**Working title:** “Comparative genomics and pangenomics of vancomycin resistant and susceptible *Enterococcus faecium* from Irish hospitals across 20 years”

**Author names:** Leigh R.J.<sup>[1]</sup>, McKenna C.<sup>[1]</sup>, McWade R.<sup>[2]</sup>, Lynch B.<sup>[2]</sup>, and Walsh F.<sup>[1]</sup>

**Affiliations:** <sup>[1]</sup>Department of Biology, Maynooth University

<sup>[2]</sup>Department of Microbiology, Mater Misericordiae University Hospital

**Corresponding author:** Dr. Robert Leigh ([rob.leigh@mu.ie](mailto:rob.leigh@mu.ie))

**Keywords:** Vancomycin resistance, Enterococcus, Evolution, Ireland, CC17

**Repositories:** Genome sequences and assembled genomes are deposited at (will be deposited to NCBI SRA and NCBI assembly upon publication).

**Abstract:**

*Enterococcus faecium* has emerged as an important nosocomial pathogen, which is increasingly difficult to treat due to the genetic acquisition of vancomycin resistance. Ireland exhibits a recalcitrant vancomycin resistant bloodstream infection rate compared to other developed countries. A set of 28 vancomycin resistant isolates was sequenced to construct a dataset alongside 61 other publicly available Irish genomes. This dataset was extensively analysed using *in-silico* methodologies and uncovered distinct evolutionary, coevolutionary, and clinically relevant population trends. These results suggest that a stable (in terms of genome size, GC%, and number of genes), yet genetically diverse population (in terms of gene

content) of *Enterococcus faecium* persist in Ireland with acquired resistance arising *via* plasmid acquisition (*vanA*) or to a lesser extent, chromosomal recombination (*vanB*). Population analysis described five clusters with one cluster partitioned into four clades which transcend isolation dates. Pangenomic and recombination analyses revealed an open (whole genome and chromosomal specific) pangenome illustrating a rampant evolutionary pattern. Comparative resistomics and virulomics uncovered distinct chromosomal and mobilomal propensity for multidrug resistance, widespread chromosomal point-mutation mediated resistance, and chromosomal harboured arsenals of virulence factors. Comparative phagomics revealed a core prophagome of three prophages throughout the dataset. Interestingly, a potential difference in biofilm formation strategies was highlighted by coevolutionary analysis, suggesting differential biofilm genotypes between *vanA* and *vanB* isolates. These results highlight the evolutionary history of Irish *Enterococcus faecium* isolates and may provide an insight into underlying infection dynamics in a clinical setting.

## Introduction:

The genus *Enterococcus* (Firmicutes; Bacilli; Lactobacilli; Enterococcaceae) are commonly observed in diverse biomes such as soil, surface water, wastewater, and as commensal inhabitants of the higher chordate (inclusive of human) gastrointestinal (GI) tract, vaginal tract, and epidermis (1,2). Two species, *Enterococcus faecium* and *Enterococcus faecalis*, are aetiological of a cohort of moderate to severe conditions when migrated from the gastrointestinal tract, especially in the immunocompromised or convalescing host (3,4). Both *E. faecium* and *E. faecalis* migration can lead to caries, cellulitis, cholecystitis, cystitis, endocarditis, endodontitis, periodontitis, peri-implantitis, postoperative peritonitis, sepsis, and neonatal meningitis (5–8). The clinical significance of these species was amplified as

antimicrobial resistance (AMR) began to evolve and disseminate throughout diverse environments (2,9).

Vancomycin is the drug-of-last-resort for recalcitrant infections with diverse resistance profiles (10), inclusive of the prominent nosocomial pathogen, methicillin-resistant *Staphylococcus aureus* (MRSA) and *E. faecium* (11,12). In recent years, vancomycin resistance has been observed in a number of human pathogens, often resulting in clinical complication and extended hospital stay (6,13–16). Ireland has one of the highest vancomycin resistant *E. faecium* (VRE) rates in Europe where 38.4% of blood stream infection isolates displaying resistance (ECDC: <https://atlas.ecdc.europa.eu/>). In particular, nosocomial VRE infection are of concern due to the rapid dissemination throughout this environment (4,15,17). Vancomycin resistance genes have been detected both on the chromosome and mobile elements (mobilome) and often accompanies other resistance genotypes (6,18–20). Commonly observed *vanA* mobilome co-resistance phenotypes are observed towards tetracycline, erythromycin, and aminoglycosides (21–24). Additionally, *E. faecium* almost ubiquitously displays chromosomal-mediated resistance to aminoglycosides (*via AAC(6')-II*), macrolides (*via efmA*, *efrAB* and *msrC*), and fluoroquinolones (*via gyrA* and *parC* mutations or upregulation of efflux), rifamycin (*via efrAB*), and to clindamycin, quinupristin-dalfopristin, and dalfopristin (*via lsaA*) (6,9,24–26).

In many countries, including the Republic of Ireland, vancomycin resistance is prominently derived from plasmid mediated *vanA*, and less commonly from chromosomal mediated *vanB* (2,27,28). Both *vanA* and *vanB* are D-Ala-D-Ala ligases (EC: 6.3.2.4) and confer resistance by constructing D-Ala-D-Lac as an alternative substrate during peptidoglycan synthesis, thus reducing vancomycin-peptidoglycan binding affinity (29–31). Aside from their associated genomic location (mobilomal vs chromosomal), *vanA* also confers resistance to

teicoplanin (another glycopeptide antibiotic) whereas *vanB* has not been observed to induce this effect (32–34).

Metal and biocide resistance is of growing concern in a plethora of environments, and especially in clinical settings (35). Correlations have been reported between metal resistance and drug resistance in pathogenic bacteria, suggesting a potential co-evolutionary pressure on both mechanisms (36–38). A range of metals are employed in healthcare for their intrinsic antimicrobial properties, for example silver embedded plasters and copper plated door handles (39–41). Previous studies have reported chromosomal mediated resistance to copper, silver, selenium, and hydrogen peroxide in *E. faecium*, suggesting a growing resistance to passive protection strategies (42–44).

Further to their resistance mechanisms, *Enterococcus* spp. employ a small cohort of effective virulence factors during pathogenesis, allowing for adhesion, biofilm formation, invasion, immunomodulation, and the synthesis of secreted toxins, enzymes, and peptides (such as bacteriocins) into local environments to inhibit competition (9,45,46). Biofilm formation is of critical importance in vancomycin resistant *Enterococcus* (VRE) infections, due to difficulty of clearance and reduced antimicrobial penetration rates (42,47).

When isolated from human samples, the average *E. faecium* genome contains  $2,765 \pm 187$  genes, yet the pangenome contained 12,457 when sampled from 161 genomes (26). These results, and other pangenomic analyses (*e.g.* (48)) illustrate the genomic plasticity and evolutionary capacity of *E. faecium*. While a major proportion of this variance is attributed to mobile genetic elements (49), to our knowledge, no study has been conducted on chromosomal pangenomic variance, so the extent of mobilome enticed variance is not fully elucidated. The integration of phages (prophages) into bacterial chromosomes can introduce genetic novelty (50–52). While a wide array of *Enterococcus* phages have been identified (53,54), and parasite-

host co-evolutionary trajectories have been explored (55), phage impact on symbiotic co-evolutionary trajectory has yet, to our knowledge, been explored.

The aims of this study were to compare the pan-genomes, mobilomes and chromosomes of the available genome sequences of vancomycin resistant or susceptible *E. faecium* across the timeframe that VRE (analysed by the ECDC: 2002 to 2019) increased in prevalence from 11.1% to 38.4% in Ireland (available at <https://atlas.ecdc.europa.eu/public/index.aspx?Dataset=27&HealthTopic=4>). Specifically, this study provides an insight into the pangenomics of *E. faecium* from three studies in Republic of Ireland using a comparative genomic, resistomic, and virulomic lens. It is now possible to derive intrapangenome correlations (Whelan *et al.*, 2020) so these approaches shall be explored to provide additional insight.

A recent study of the global dissemination of *E. faecium* identified that it has two main modes of genomic evolution: the acquisition and loss of genes, including antimicrobial resistance genes, through mobile genetic elements including plasmids, and homologous recombination of the core genome (49). Unfortunately, there were no Irish isolates contained within this study.

## Methods:

### Microbiological analysis

Twenty-eight isolates identified as vancomycin resistant *Enterococcus faecium* during 2018 and 2019 were collected by the *Mater Misericordiae* University Hospital (MMUH) in Dublin. The sample metadata are described in SI Table 1. Antimicrobial susceptibility testing was performed at the MMUH according to EUCAST guidelines

([https://www.eucast.org/ast\\_of\\_bacteria/](https://www.eucast.org/ast_of_bacteria/)) and subsequently at Maynooth University using disk testing according to the CLSI guidelines. The isolates were investigated for resistance to the following antibiotics: (ciprofloxacin, erythromycin, chloramphenicol, vancomycin, tetracycline, ampicillin, and linezolid) (SI Table 2).

#### DNA extractions genome sequencing

DNA was extracted from each of the 28 isolates using the Macherey-Nagel Nucleospin microbial DNA isolation kit according to the manufacturer's instructions. The extracted DNA was sequenced by Novogene using the "Bacterial resequencing" service on the Illumina with PE150 and Q30  $\geq$  80%. This provided >100X coverage of each genome.

#### Genome assembly

The 28 samples sequenced for this study and all reads associated with Irish VRE genomes from British Society for Antimicrobial Chemotherapy study PRJEB4344 (hereafter referred to as the "BSAC" isolates (57)) were downloaded from the NCBI sequence read archive (SRA; (58)). Each read pair (sample) was subjected to adapter removal and quality trimming using TrimGalore v.0.6.6. (59) using default settings. Adapter removal during the TrimGalore pipeline was powered by CutAdapt v.3.0 (60) and FastQC v. 0.11.9 (61). Each sample was assembled using Unicycler v.0.4.7 (62) using default paired-end settings. Unicycler utilised SPAdes v.3.14.1. (63) to assemble reads and used Bowtie2 v.2.4.2. (64), Pilon v.1.23 (65), BLAST v.2.11 (66,67), and samtools v.1.11 (68) to further complete the assembly. Each assembly was quality assessed using CheckM (69) using the *Enterococcus faecium* database (SI Table 3) and sequence typed using MLST v.2.19.0 (Jolley and Maiden, 2010; Seemann,

2014) using default settings (SI Table 4; Figure 1). Instances where a ST could not be completely identified, the approximated alleles were used to approximate a ST using the “search by locus combinations” option for *E. faecium* using PubMLST ([www.pubmlst.org](http://www.pubmlst.org) (72)). Each assembly was separated into “chromosomes” and “plasmids” (hereafter referred to as “mobilomes” as complete plasmids were not always guaranteed and were treated collectively as an extrachromosomal entity) using Platon v.1.5.0 (73). These partitioned assemblies were analysed alongside their concatenated “whole genome” assemblies. Assemblies that had a reported completeness percentage  $\leq 95\%$  were retained for further analyses.

#### Additional genomes

A total of 11 *Enterococcus faecium* genome assemblies were available on NCBI assembly and attributed to Ireland in their respective metadata (from study PRJNA521309; (74)). As above, these assemblies were quality checked using CheckM, sequence typed using MLST, and separated into chromosomal and mobilomal components using Platon. These 11 isolates were all sampled in county Cork and shall be hereafter referred to as the “Cork” isolates.

#### Plasmid containment analysis

As plasmids were contiguous, a containment analysis was used to determine the closest relatives of the mobilome. Each containment analysis was performed using the “screen” algorithm in MASH v. 2.2.2. (75) against PLSDB (76) with a *P*-value stringency cut-off of 0.1

and an identity stringency cut-off of 0.99 to replicate the parameters used during the construction of PLSDB (Table SI 5).

## Genome annotation

Each assembly dataset (whole genome, chromosomal, and mobilome) was annotated using Prokka v.1.14.6 (Seemann, 2014) using default settings. Prokka used Prodigal v.2.6.3 (78) to predict gene sequences, Aragorn v.1.2.38 (79) to detect tRNA sequences, and Minced v.0.4.0 (80) to detect CRISPR sequences, SignalP v.4.0 (81) to detect signal peptides, and HMMER v.3.3.1 for protein similarity searching (82), BioPerl v.1.7.2 for file manipulation (83), and barrnap v.0.9 for rRNA profiling (84). Each protein sequence in each assembly dataset was further annotated using InterProScan v.5.45-80.0 (85) using the “--appl PfamA” and “--goterms” to assign Pfam domains (86) and Gene Ontology terms (87) respectively. Finally, each assembly dataset was searched for secondary metabolite biosynthesis genes using a set of tools with their respective default settings (unless otherwise stated below): GECCO v.0.6.3 (88) and AntiSMASH v.5 (89), for transposable elements using MobileElementFinder v.1.0.3. (90), for antimicrobial resistance using ABRicate v.1.0.1 (Seemann, 2014) with the associated CARD database (92) and PointFinder v.1 (using the *Enterococcus faecium* database (93)), for virulence factors using ABRicate with the associated VFDB dataset (94), and for metal (and biocide) resistance using BacMet v.2.0 (95). As BacMet is published as an amino acid dataset, it was first backtranslated to a representative nucleotide sequence (using translation table 11) using the “backtranseq” function in EMBOSS v.6.6.0.0 (96) with codon usage tables for *Enterococcus faecium* (the subject of this study); *Enterococcus faecalis*, *Staphylococcus aureus*, *Klebsiella pneumoniae*, *Acinetobacter baumannii*, *Pseudomonas aeruginosa*, *Enterobacter* spp. (ESKAPE pathogens); *Escherichia coli* (model organism), *Treponema*



*pallidum*, *Neisseria gonorrhoeae*, *Chlamydia trachomatis* (prevalent bacterial STIs),  
*Clostridium botulinum*, *Campylobacter jejuni*, *Listeria monocytogenes*, and *Vibrio*  
*parahaemolyticus* (prominent foodborne pathogens), *Helicobacter pylori* (common gastric  
pathogen) and *Clostridiodes difficile*, *Legionella pneumophila*, and *Mycobacterium*  
*tuberculosis* (common nosocomial infections). Codon usage tables were obtained from the  
Kazusa genome research institute (<https://www.kazusa.or.jp/en/>). To mitigate false negatives,  
ABRicate was ran with a 50% minimum percentage identity stringency score (as opposed to  
the default 80%) to allow for the detection of full-length homologs that may have been  
otherwise undetected (Collated results for AntiSMASH and ABRicate are given in SI Tables  
6-10).

#### Genome characteristic statistical analysis

The sum of coding genes, genome size (Mbp), genome density (the mean number of  
genes per Mbp), and guanine-cytosine content (GC%) was calculated for the chromosomal and  
mobilomal datasets for each sample (SI Table 11; Figure 2). Summary statistics (mean, median,  
standard deviation, and variance) was computed for each data series (SI Table 12). Two-tailed  
Welch's *t*-tests ( $H_0: \mu_a = \mu_b$ ;  $H_A: \mu_a \neq \mu_b$ ; (97,98)) were used to compare genome density and GC%  
between chromosomal and mobilomal datasets, a Bonferroni-Dunn correction ( $P_{BD} = P \times$   
 $n_{comparisons}$ ;  $n_{comparisons} = 2$ ; (Bonferroni, 1936; Dunn, 1961)) was used to control Type-I errors  
and instances where  $P_{BD} \leq 0.005$  were considered statistically significant. A  $P \leq 0.005$  will be  
used to determine significance in all pairwise test comparisons to control for potential Type I  
and Type II errors (101). Summary statistics were calculated for gene length in each genomic  
subset (chromosomal and mobilomal), distributions were assessed for normality using a  
Kolmogorov-Smirnoff test ( $H_0: \sim X = N(\mu, \sigma)$ ;  $H_A: \sim X \neq N(\mu, \sigma)$ ; (102,103)) and equivariance using

a Levene's test ( $H_0: \sigma_a^2 = \sigma_b^2; H_A: \sigma_a^2 \neq \sigma_b^2$ ; (Levene, 1960)). All samples were observed to be non-normally distributed and 26 of 79 were observed to have unequal variances (Levene's test  $P \leq 0.05$ ). Considering these trends, a Brunner-Munzel test ( $H_0: B=0.5; H_A: B \neq 0.5$ ) was used to determine whether chromosomes were statistically more likely to have longer genes than mobilomes. A Bonferroni-Dunn correction was applied ( $n_{\text{comparisons}} = 79$ ) and instances where  $P_{BD} \leq 0.005$  were considered statistically significant (SI Table 12).

### Genome relatedness

Chromosomal sequences from each isolate were all-vs-all compared using MASH v. 2.2.2. (75) and instances where the reported distance ( $D$ )  $\leq 0.05$  with a  $P$ -value  $\leq 0.05$  extracted as an edge list and visualised as a network with Gephi v.0.9.2 (104) using the Fruchterman-Reingold algorithm (105) (Figure 3). This procedure was repeated for mobilomal sequences (Figure 4).

### Pangenome analysis

A pangenome for the whole genome and chromosomal datasets (for all isolates, and individually for the "Cork" isolates, for the "BSAC" isolates, and for the isolates sequenced for this study) was produced using Roary v.3.1.3. (106) with the "-e" flag to align all gene clusters using PRANK v.170427 (107), and the "-z" flag to keep intermediate files (retained to produce the robust phylogeny below). To assess the effect of the mobilome on the genome diversity and complexity, each pangenomic category ( $n_{\text{genes}}$ ; "core pangenome" ( $99\% \leq n_{\text{samples}} \leq 100\%$ ), "soft core pangenome" ( $95\% \leq n_{\text{samples}} < 99\%$ ), "shell pangenome" ( $15\% \leq n_{\text{samples}} < 95\%$ ), and "cloud pangenome" ( $n_{\text{samples}} < 15\%$ )) in the whole genome generated pangenome

was compared to the chromosomal pangenome using a two-tailed Fisher’s exact test ( $H_0: \rho = \pi; H_A: \rho \neq \pi$ ; (108)) with a Bonferroni-Dunn correction ( $n_{\text{comparisons}} = 4$ ), instances where  $P_{\text{BD}} \leq 0.05$  were considered statistically significant, and statistically significant instances where  $\rho > \pi$  were considered to be overrepresented and instances where  $\rho < \pi$  were considered underrepresented (SI Table 13).

#### Pangenome function

The representative pangenome refers to the collection of representative sequences from each pangenome cluster. Gene ontology terms (as assigned by InterProScan) were extracted and slimmed from the whole genome dataset (inclusive of all isolates) using the “map\_to\_slim.py” from GOATools (109) using generic .obo files. Sequences were grouped into their pangenomic categories and compared to the background population using the “find\_enrichment.py” script (using a Fisher’s exact test ( $H_0: \rho = \pi; H_A: \rho \neq \pi$ ) and Bonferroni-Dunn correction (SI Table 14))

#### Phylogeny construction

A phylogeny was constructed using single-copy, ubiquitous gene alignments (as produced by PRANK during pangenome construction) from the chromosomal dataset. The chromosomal dataset was used to further minimise the likelihood of interference non-vertically inherited sequences on the phylogeny. Each alignment was quality trimmed using TrimAL v.1.4 (110) using the “-automated1” flag. A superalignment was constructed by concatenating all trimmed alignments using FASconCAT v.1.04 (111) and a consensus phylogeny was constructed using IQtree v.1.6.12 (112) with 10,000 bootstrap replicates. IQTree used

ModelTest-NG v.0.1.7 (113) to determine the GTR+F+R6 (114) nucleotide evolutionary model to be most appropriate for phylogenetic reconstruction. The root of the tree was determined by creating a second phylogeny with a specified outgroup of 2 *Staphylococcus aureus* genomes. The second phylogeny was constructed by clustering all chromosomal and staphylococcal proteins using ProteinOrtho v.6.0.24 (115) with a stringency cut off value of  $E \leq 1.00e^{-50}$ . All protein clusters that were ubiquitous in all *Enterococcus faecium* species and single copy for each species within each cluster were extracted and aligned using Muscle v.3.8.1551 (116). Each alignment was trimmed as above using TrimAL (using the “-automated1” flag) and a consensus tree was constructed as above using IQtree with 10,000 bootstrap replicates. ModelFinder-NG determined LG+I+G (117) to be the best model of protein evolution. The second phylogeny determined ST178 (all samples isolated in Cork, Ireland) to be the outgroup of the core gene tree. The finalised phylogeny was displayed and annotated using iTOL v.5 (118) (Figure 5). The phylogeny was annotated with genome annotation data (generated using the analyses above and below) to visualise underlying trends (Figures 6-10; SI Figure 1)

### Isolate clustering

Isolates were clustered using previously constructed core gene superalignment using RhoBAPS v.1.1.3 (119,120) with a maximum depth of two, an initial population cluster of 20, and with an additional 100 rounds of processing to approximate optimal clustering (Figure 5; Figure 11; SI Table 15). All isolate-cluster assignments were determined to approach 100% likelihood ( $P = 1$  in all cases) indicating that their placement is correct.

### Core genome MLST

A core genome MLST (cgMLST) was constructed for all isolates using chewBBACA v.2.8.5 (121) using default settings and using the *Enterococcus faecium* Prodigal training file provided with the software. The cgMLST profile was displayed and annotated with metadata using GrapeTree (122) with the MSTree V2 algorithm (Figure 12). The generated cgMLST was verified using our previously generated data pangenomic data with PANINI v.1 (123). Briefly, as PANINI requires a minimum of 100 input taxa, we constructed a pseudo-dataset where each taxon was represented twice and processed. Pseudo-taxa were removed from the PANINI output and was visualised alongside the previously constructed phylogeny and annotated with their associated RheirBAPS generated clade using MicroReact (124) (SI Figure 2).

#### Pangenomic co-evolutionary analyses

The chromosomal phylogeny and Roary-derived pangenome (inclusive of all isolates) were used to test statistically significant associations or dissociations between any vancomycin resistance gene (*vanA*, *vanB*, *vanH*, *vanW*, *vanX*, *vanXB*, *vanY*, *vanYB*) and any other gene (SI Table 16) using Coinfinder (56). Coinfinder uses a binomial test ( $H_0: \pi = \pi_x; H_A: \pi \neq \pi_x$ ) and while the authors advise the use of a Bonferroni-Dunn corrected, this was not implemented so all coincidences could be explored and instances where  $P \leq 0.005$  were considered statistically significant.

#### Recombination analysis

Using RheirBAPS resulted into two distinct clades, the “Cork” isolates (CC94) and all other isolates (CC17; discussed in a later section). To examine the extent of core genome

recombination on CC17 evolution, genomic comparisons were performed between each CC17 isolate and a “complete genome” *Enterococcus faecium* (reference) assembly (downloaded from NCBI Assembly). The reference was selected from a pool of all available *Enterococcus faecium* complete genome assemblies (which passed taxonomy assignment) from NCBI Assembly, where each genome was assessed for *vanA* or *vanB* presence using ABRicate with the CARD database (--minid 50), assigned a sequence type using MLST, and assigned a CC using PubMLST. Any assembly with a *vanA*+ or *vanB*+ phenotype, with an indeterminant ST, or assigned to either CC17 or CC94 were discarded. Remaining isolates were processed to remove plasmids and the remaining chromosomal sequence was annotated using Prokka with default settings. Proteins from all CC17, CC94, and candidate reference assemblies were clustered using ProteinOrtho ( $E \leq 1e^{-50}$ ). Protein clusters that were both single copy and ubiquitous in all species were individually aligned using Muscle with uninformative regions using TrimAL (with the “-automated1” flag) and concatenated into a superalignment using FASConCAT. The superalignment was processed to construct a consensus tree with 10,000 bootstrap replicates using IQTree. The resultant consensus tree was rooted at CC94 and the closest assembly to CC17 was selected as the reference strain. The most suitable reference was determined to be GCF\_005166365.1 (strain NM213; PRJNA513159). Strain NM213 was isolated from healthy Egyptian infants in 2018 to determine its potential as a probiotic (<https://www.ncbi.nlm.nih.gov/bioproject/PRJNA513159/>).

Whole genome alignments were constructed between strain NM213 and each CC17 assembly and concatenated using Snippy v.4.6.0 (snippy-multi) with default settings (<https://github.com/tseemann/snippy>). The resultant core whole multigenome alignment was processed to convert non-standard nucleotide characters to (ATGC) to “N” using a Snippy auxiliary script (“snippy-clean\_full\_aln”). Genomic recombination regions were detected using Gubbins v.3.0.0 (125) using default settings and the extent of recombination was

illustrated using Phandango v.1.3.0 (126) where the previously constructed core-genome phylogeny (of CC17 and CC94) was used to scaffold recombination (Figure 13). This procedure was replicated for the remaining 24 suitable references (SI Figure 3).

## Phages

Phage and prophage elements within each chromosomal and plasmid sequence were assessed using Phigaro v. 2.3.0 (127) with default settings and saving the detected viral sequences to their own output files (“--save-fasta” flag) (SI Table 17). The sum of phages per genome were counted (SI Table 18). Extracted viral sequences were assessed as a source of drug resistance, metal resistance and virulence factors using abricate with the CARD, BACMET, VFDB databases as above and as a source of secondary metabolism machinery using GECCO as above, only one gene-of-interest was observed (discussed below). Extracted prophages were annotated using Prokka using the “--kingdom Viruses” flag.

## Phage classification

A database of all Caudoviridae ICTV exemplar reference phage genomes were downloaded from NCBI Assembly. Caudoviridae were selected as this clade encompassed all viral families identified by Phigaro (Siphoviridae, Inoviridae, and Myoviridae, respectively). Each extracted prophage was searched against the database using Mash v.2.2.2 (75) using the “dist” (distance) algorithm. As we searched prophages (partial genomes) against phages (whole genomes) we selected top hits (1 per prophage) from instances with the shortest distances ( $D < 1$ ) and smallest  $P$ -values ( $P \leq 0.005$ ) for each prophage (SI Table 18; Figure 14).

## Integron assessment

The presence of integrons in chromosomal and plasmid sequences was determined using IntegronFinder v.2.0 (128) using the “--local-max” flag and setting “--calin-threshold” flag to 1 (instead of the default 2). We chose to set the “--calin-threshold” flag to 1 to include integrated regions with CALIN artefacts. While lowering this threshold may yield a higher number of false positives, we feel it is appropriate for exploratory purposes. The distribution of integrons per genome is given in SI Table 19. Again, ABRicate was used to determine whether contigs containing integron elements contained genes-of-interest (SI Table 20; Figure 15).

## **Results**

### Quality control

All assemblies were reported to have a high level of completeness ( $\mu_{\text{completeness}} = 99.29 \pm 0.55\%$ ;  $95.16 \leq \% \leq 99.61$ ; SI Table 3).

### General characteristics of the genomes

Genomes used in this manuscript were reported to have a mean chromosomal gene count of  $2537.91 \pm 77.44$  ( $\eta = 2550.5$ ;  $2334 \leq n \leq 2730$ ) and an aggregated (chromosomal and mobilomal) gene count of  $2,821.64 \pm 116.65$  ( $\eta = 2812$ ;  $2508 \leq n \leq 3158$ ). For chromosomal data, a mean gene sum of  $2537.91 \pm 77.44$ , a mean genome size of  $2681.5 \pm 78.77$  Mbp, a mean density of  $0.946 \pm 0.0098$  genes/Mbp, and a mean GC% of  $38.03 \pm 0.15\%$  (SI Tables 10-11;



Figure 2). For mobilomal data, a mean gene sum of  $283.73 \pm 84.86$ , a mean genome size of  $259.99 \pm 75.76$  Mbp, a mean density of 1.088 genes/Mbp, and a mean GC% of  $34.70 \pm 0.38\%$ . When statistically examined, mobilomes were observed to be significantly denser with regards the number of observed genes (to have a greater number of genes per Mbp genome;  $P_{BD} < 1.00e^{-06}$ ) and had a significantly lower GC% ( $P_{BD} < 1.00e^{-06}$ ) When the coding proportions were compared, 19 mobilome samples were reported to be significantly less dense (in terms of the sum of coding nucleotides) than their chromosomal counterparts, however 61 comparisons displayed insignificant differences.

#### Genetic relatedness (MLST, cgMLST, and RheirBAPS)

While a total of 16 STs were observed throughout the dataset, considerable differences were observed between the 3 sources (isolates sequenced for this study, previously published isolates, and “Cork” isolates). The “Cork” isolates were exclusively ST178, and ST178 was not observed in either of the clinical sources (Figure 1, SI Table 4). Isolates sequenced for this study were predominantly ST80 (16 of 28; 57.14%) and previously published isolates were predominantly ST17 (17 of 40; 42.5%) and ST192 (9 of 40; 22.5%). Interestingly, ST80 and ST17 are exclusively observed in their associated sources, however ST192 and ST203 are observed in both sources.

Isolate clustering using RheirBAPS matched clonal complexes at level one, with all CC94 isolates assigned to Cluster A and all CC17 isolates assigned to Cluster B (SI Table 14). At level two, eight clusters were observed, however using phylogenetic inference, this can be collapsed to five clusters with four subclusters. As all CC94 isolates were again assigned to a single cluster, CC17 isolates formed four clusters ( $\alpha$ ,  $\beta$ ,  $\gamma$ ,  $\delta$ ) with four subclusters ( $\delta_1$ ,  $\delta_2$ ,  $\delta_3$ , and  $\delta_4$ ). These clusters are named based on their phylogenetic divergences (Figure 5) . Cluster

$\alpha$  contained one genome, ERR374806 (ST1032) and was the earliest diverging CC17 isolate in our dataset. Cluster  $\beta$  encompassed all ST203 isolates and all ST192 isolates except for ERR374982 (which was assigned to Cluster  $\gamma$ , matching its phylogenetic placement). Cluster  $\gamma$  encompasses all ST78 isolates and the singleton ST192. As previously mentioned, Cluster  $\delta$  was comprised of four distinct subclusters ( $\delta_1$ ,  $\delta_2$ ,  $\delta_3$ , and  $\delta_4$ ). Where  $\delta_1$  is basal to all other  $\delta$  clades, and  $\delta_2$  is basal to sister clades  $\delta_3$  and  $\delta_4$ . Clade  $\delta_1$  encompassed all ST17 isolates, and isolates assigned to singleton ST groups (ST18, ST132, ST982, ST1038, ST1421). Clade  $\delta_2$  encompassed all ST80 isolates, two ST80 isolates, and singleton ST isolates (ST16, ST64, ST132, ST202, ST612). Clade  $\delta_3$  encompasses seven ST80 isolates and clade  $\delta_4$  encompasses the remaining eight ST80 isolates and the singleton ST787. These results suggest that ST80 is a descendant of ST17 and is undergoing considerable chromosomal evolution. Clusters  $\alpha$ ,  $\beta$ , and  $\gamma$ , and Subclusters  $\delta_3$ , and  $\delta_4$  all displayed monophyly. Subcluster  $\delta_2$  displayed considerable paraphyly with 4 root nodes. Subcluster  $\delta_1$  also displayed paraphyly (if the Cluster  $\delta$  earliest diverging taxon (Sample 8) is ignored) due to ERR374755. The Subcluster  $\delta_1$  paraphyly may be considered an artefact of cluster evolution, with Subclusters  $\delta_2$ ,  $\delta_3$ , and  $\delta_4$  undergoing rapid evolution after the divergence of ERR374755 from their common ancestor. The paraphyly observed in Subcluster  $\delta_2$  may be due to sample size and may be resolved or further partitioned with additional taxa. The paraphyly observed is likely due to evolutionary expansion between sampling times, with earlier diverging isolates (BSAC isolates) being isolated prior to 2011 and later diverging isolates (isolates sequenced for this study) being sequenced in 2018).

The cgMLST graph (and associated graph analyses) displayed considerable modularity (Figure 12; SI Figure 2) with distinct clades forming, largely corroborating RheirBAPS results, regardless of the year of isolation. Two exceptions were observed for this trend: firstly, polyphyly in Cluster  $\beta$  was observed with isolates from 2009 adjacent to Cluster  $\gamma$ , and those from 2018 adjacent to Subcluster  $\delta_2$ . Again, Subcluster  $\delta_2$  appeared less modular than other

Clusters (mirroring paraphyly observed in the phylogeny), but this was likely due to core genome evolution between sampling dates. A Subcluster  $\delta_2$  isolate was observed adjacent to Subcluster  $\delta_4$ .

#### Plasmid containment

As expected, the majority of PLSDB hits were attributed to *E. faecium* (SI Table 5), however some other interesting observations were also noted. All eleven CC94 (Cork) isolates each displayed a hit to two *Listeria monocytogenes* strain CFSAN023459 plasmids (pCFSAN023459\_01 and pCFSAN023459\_02), eight CC94 isolates also returned a hit for *Enterococcus hirae* strain CQP3-9 plasmid pCQP3-9\_1. Hits pertaining to *Bacillus cereus* plasmid pBC16 were observed across CC17, interestingly, all Cluster  $\gamma$  isolates except ERR375014 (ST78) and all Cluster  $\beta$  isolates except ERR374813 and ERR374914 (ST203; only Cluster  $\beta$  isolates not sequenced during this study) returned a hit. Plasmid pEGM182-2 from *Enterococcus casseliflavus* strain EGM182 was observed in CC94 and in Subclusters  $\delta_3$  and  $\delta_4$ , where four of six  $\delta_3$  isolates (except Samples 6 and 12; ST80) returned two hits for pEGM182-2. Hits were returned for *Escherichia coli* strain UB-ESBL31 plasmid pESBL31 from isolates across the phylogeny. Of note, all Cluster  $\gamma$  isolates and five  $\delta_4$  isolates returned a hit for pESBL31. Most of these isolates (14 of 15) were sampled between 2002 and 2011, and one isolate (Sample 1) was sampled in 2018, suggesting persistent survivability for this plasmid and its descendants.

#### Antimicrobial susceptibility profiles

The 28 vancomycin resistant *Enterococcus faecium* were isolated from 22 hospital patients in 2018/2019 (MMUH, Dublin isolates). Samples 2 and 24 were isolated on the same day from patient 2. Samples 10, 5 and 27 were isolated from patient 5 at days 92, 100 and 107, respectively. Samples 21, 20, 9 and 26 were isolated from patient 9 on days 0, 8, 19 and 365, respectively. The antimicrobial susceptibility profiles (SI Table 2) of the isolates confirmed they were all vancomycin resistant. Of the 28 VRE*fm*, 25 were erythromycin resistant, two were chloramphenicol resistant, 28 were ampicillin resistant, 19 were tetracycline resistant and two were linezolid resistant. Samples 14 and 24 were the only isolates resistant to chloramphenicol or linezolid. While sample 2 was isolated from the same patient as sample 24 it did not display the same resistance profile. The three samples susceptible to erythromycin did not display a specific AMR gene absence associated only with these samples. The metadata of the BSAC study contained susceptibility to vancomycin data only and the “Cork” isolates contained no antimicrobial resistance data. Of the BSAC study isolates 23 were vancomycin susceptible and 17 were vancomycin resistant (SI Table 1).

#### Antimicrobial resistance genotyping

A total of 32 resistance genes were observed throughout the dataset, of which 13 were exclusively observed in the chromosome (AAC(6')-Ii, *dfrF*, *ermT*, *efmA*, *msrC*, *tetM*, *vanB*, *vanHB*, *vanRB*, *vanSB*, *vanWB*, *vanXB*, and *vanYB*), where one pair (*vanRB* and *vanSB*) were observed exclusively in isolate ERR374834. Ten genes were observed exclusively on the mobilome (ANT(6)-Ia, *Enterococcus faecium* chloramphenicol acetyltransferase, *catA8*, *lsaE*, *tetU*, *vanA*, *vanHA*, *vanRA*, *vanXA*, and *vanZA*), and 9 were observed in either the chromosome or mobilome (AAC(6')-Ie-APH(2'')-Ia, APH(3')-IIIa, *ermB*, *SAT-4*, *aad(6)*, *dfrG*, *tet(L)*, *vanSA*,

and *vanYA*). Interestingly, the 9 genes present on either the chromosome or mobilome never appeared both chromosomally and mobilomally in the same isolate (SI Table 6; Figure 6).

#### Mobile AMR genes

The *vanA* gene was present only in the mobilome of 44 isolates, almost always with the cluster of *vanHA*, *vanRA*, *vanSA*, *vanXA*, *vanYA* and *vanZA* (SI Table 6; Figure 6). These mobilomes were sampled from across CC17, spanning Clusters  $\beta$ ,  $\gamma$ , and  $\delta$  (encompassing 16 ST80 isolates, 7 ST78 isolates, 5 ST203 isolates, 4 ST17 isolates, and 3 ST192 genomes, and one isolate from each of ST16, ST18, ST64, ST132, ST202, ST612, ST1032, ST1421 and an unassigned ST). The *vanA* isolates comprised samples from the BSAC study ( $n = 16$ ) isolated in 2002, 2003, 2005, 2006, 2007 and 2009 to 2011 and the isolates from Dublin between 2018 and 2019 ( $n = 28$ ). The *vanB* gene was identified on the chromosomes in addition to the mobile *vanA* on two isolates from the BSAC study and one isolate from MMUH (sample 1). Samples 14 and 24 (ST80, Subcluster  $\delta_4$ ) were linezolid resistant but did not contain the mobile linezolid resistance genes. Both samples were also the only isolates displaying chloramphenicol resistance. However, neither contained any known mobile chloramphenicol resistance genes. *Enterococcus faecium* chloramphenicol acetyltransferase (conferring resistance to phenicols) was observed in the mobilome of 3 of 17 ST17 isolates and in the ST1038 isolate (all Subcluster  $\delta_4$ ). Another phenicol resistance gene *catA8* was also observed in the mobilome of sample 26. However, all were phenotypically susceptible to chloramphenicol.

The resistance gene *lsaE* (conferring resistance to lincosamide) was observed on the mobilomes of samples 18 and 26 and ten isolates from the BSAC study. The genes *aad(6)*, *ermB* and *aph(3')III-a* were present in each of the BSAC mobilomes containing *lsaE*. The tetracycline resistance gene *tetU* was observed on the mobilome of 6 ST80 isolates, 2 ST18

isolates, and one isolate from each of ST17, ST132, ST787, ST1038, and ST1421 respectively. In addition, *tetL* (conferring resistance to tetracyclines) was frequently present on the mobilomes.

### Chromosomally mediated AMR

The *vanB* gene was identified in 11 isolates and were always chromosomal. A cluster of *vanB*, *vanWB*, *vanXB*, and *vanYB* (conferring resistance to glycopeptides, specifically vancomycin) was observed in nine Subcluster  $\delta_1$  isolates (accounting for one ST16, and 8 of 17 ST17 isolates) and one Subcluster  $\delta_2$  isolate (ERR374832; ST132) (SI Table 6; Figure 6). With the exception of ST16, all isolates with these four genes were also observed to possess *vanHB*, and the ST132 isolate was further observed to possess *vanRB* and *vanSB*. The genes *vanSA* and *vanYA* were individually (and uniquely) observed in sample 8 (unassigned ST) and sample 23 (ST203) respectively.

One chromosomal exclusive gene, *aac(6')-II* (aminoglycoside resistance), was observed to be ubiquitous in all samples and one other *msrC* (macrolide and streptogramin B resistance), was observed in all isolates except sample 23 (ST64). The combination of these two genes is reported to confer resistance to compounds from the aminoglycoside, lincosamide, macrolide, oxazolidinone, phenicol, pleuromutilin, streptogramin, and tetracycline classes (129–132). Interestingly, CC94 isolates were not observed to possess any other AMR genes beyond these two examples. The genes *ermB* and *ermT* (conferring resistance to lincosamide, macrolide, and streptogramin) were present in 46 of 68 CC17 isolates. Only one isolate, sample 23 (ST64), was observed to possess both *ermB* and *ermT* genes and each individual gene was distributed relatively unevenly throughout the dataset (*eg.* *ermB* was observed in 8 ST80 isolates, *ermT* in 5 ST80 isolates, and 5 ST80 isolates lacked both genes); however, it was

observed that, if present, an isolate only possessed one of *ermB* or *ermT* on the chromosome (with the exception of Sample 23). The distribution of *erm* in this regard does seem to follow an underlying phylogenetic bias. For example, approximately half of Subcluster  $\delta_2$  possess *ermB* and the other possess *ermT*. This transition appears to have occurred after the divergence of ERR374697 as it is retained in all later diverging taxa (Figures 5,6). Another example of *erm* bias can be observed between Subclusters  $\delta_2$ ,  $\delta_3$ , and  $\delta_4$ , where  $\delta_2$ ,  $\delta_3$  display bias towards *ermB* and  $\delta_4$  towards *ermT*. As both genes are observed in the Sample 23 chromosome (the earliest diverging  $\delta_4$  taxon), it can be reasonably assumed that this transition occurred after the divergence of Sample 23 from the last common ancestor of the remaining  $\delta_4$  isolates.

The gene *dfrF* (conferring resistance to trimethoprim) was observed distributed throughout the dataset (like *ermBT*) and displayed phylogenetic biases towards Cluster  $\gamma$ , and *ermT* positive members of Subclusters  $\delta_1$ ,  $\delta_2$ , and  $\delta_3$ . The gene *tetM* (conferring resistance to tetracycline) was scattered throughout the dataset but was specifically observed in 13 or 18 ST80 isolates.

#### AMR genes present on either mobilome or chromosome.

Seven of the AMR genes detected were distributed across either the mobilome or the chromosome within the samples investigated (*AAC(6')-Ie-APH(2'')-Ia*, *aph(3')-IIIa*, *ermB*, *SAT-4*, *aad(6)*, *dfrG* and *tetL*). This demonstrates the inter-connectedness of the mobilome and the chromosome as a mode of AMR gene transport within these isolates (SI Table 6; Figure 6).

Core resistome

Using default pangenomic parameters (106), a core chromosomal resistome (inclusive of soft-core) whereby a gene is represented in  $\geq 95\%$  ( $\geq 75$  genomes) comprise of two genes: *AAC(6')-II* and *msrC*. When CC94 is excluded, the core mobile resistome ( $\geq 64$  genomes), is expanded to include *efmA*. A core mobile resistome was not established.

#### Single nucleotide point mutations

Linezolid resistance was identified phenotypically in sister taxa, Samples 14 and 24, but no associated plasmid mediated resistance mechanism was identified (SI Table 6; Figure 6). In addition, the 23S rRNA, L3 and L4 gene sequences and amino acid sequences, respectively, were compared with the linezolid susceptible isolates in this study using PointFinder (SI Table 7; Figure 7). No linezolid resistance associated mutations were identified. Thus, the mechanism of linezolid resistance has not been identified. The linezolid resistance phenotype of the BSAC or CC94 isolates was not reported.

The ciprofloxacin resistance phenotype was not reported in the BSAC or CC94 isolate associated metadata. Isolates sequenced for this study were all ciprofloxacin resistant. The gyrase and topoisomerase IV genes (*gyrA* and *parC*) from each isolate was compared with the ciprofloxacin susceptible strains using PointFinder to identify point mutations associated with ciprofloxacin resistance. Mutations in all isolates were identified at amino acid position 83 in GyrA, resulting in either an S83I change in all  $\delta_2$  isolates (Samples 6, 7, 12, 15, 19, 20, and 22) or an S83Y change in the remaining samples sequenced for this study, in *ermT* positive  $\delta_1$  isolates, both ST203 isolates, in the only Cluster  $\alpha$  isolate, and in a four-isolate clade of  $\delta_2$ . In addition, two mutations at amino acid 709: Y709N and Y709D, outside the quinolone resistance determining region (QRDR) in the same groups of isolates. Point mutations at p.S80 were observed across all CC17 isolates except ERR37474. The majority (53 of 78) of isolates



displayed an S80I mutation and the remaining 15 isolates displayed an S80R mutation. Point mutations in ParC follow a phylogenetic pattern, appearing in blocks with sister taxa (Figure). Interestingly, all Cluster  $\gamma$  isolates displayed the S80R mutation. As these point mutations are at the same site, it can be reasonably assumed that this point mutation is more likely to be inherited from the CC17 common ancestor than *via* several individual convergent events.

Thus, ciprofloxacin resistance was due to the mutations at serine 83 in the GyrA protein and serine 80 in the ParC protein in all isolates sequenced for this study.

### Metal resistance

No metal or biocide resistance genes were observed on any mobilome sequence. A “core” metal-resistome of 3 single-copy genes (*chtR*, *chtS*, and *sodA*) was observed in all chromosomes (SI Table 8; Figure 8). A further 3 single copy genes (*copA*, *copB*, and *copY/tcrY*) observed in all chromosomes except for two isolates sequenced during this study, sample 9 and sample 21 (both from ST192). One gene, *perR* was observed as a single-copy ortholog in all clinical isolates (inclusive of ST192) but absent in all “Cork” samples. One gene, *dpr/dps* was observed exclusively in sample 8 (unassigned ST). Finally, a set of 6 genes (*merA*, *merRI*, *tcrA*, *tcrB*, *tcrY*, and *tcrZ*) were observed exclusively in the “Cork” samples (CC94). In summation, all samples (except ST192) shared 7 genes (*chtR*, *chtS*, *copA*, *copB*, *copY/tcrY*, *perR*, and *sodA*). These 7 genes confer resistance towards selenium (*chtR*), hydrogen peroxide (*chtR*, *perA*, and *sodA*), chlorhexidine (*chtS*), copper (*copA*, *copB*, *copY/tcrY*) and silver (*copB*) (36,133). The absence of *copABY* from ST192 may indicate copper and silver susceptibility in these samples. The presence of *dpr/dps* in sample 8 is expected to confer iron resistance and increased resistance to hydrogen peroxide (134,135). The presence of *merA* and *merRI* in the CC94 samples indicates intrinsic resistance to mercury and phenylmercury acetate (an

organomercuric compound) and the presence of *tcrABYZ* suggests increased copper resistance (43,136–139).

Using default pangenomic parameters (106), a core chromosomal metal resistome (inclusive of soft-core) whereby a gene is represented in  $\geq 95\%$  genomes ( $\geq 75$  genomes) comprise of six genes: *chtR*, *chtS*, *copA*, *copB*, *copY/tcrY* and *sodA*. When CC94 is excluded, the core metal resistome ( $\geq 64$  genomes), is expanded to include *perR*.

### Virulence factors

Each CC94 isolate contained a plasmid mediated virulence factor (VF), the biofilm-associated transcription factor *bopD* (SI Table 9; Figure 9). Only one other VF was observed to be plasmid mediated: the fibrinogen binding surface protein *fss3* (only observed within sample 18 (ST80)), all other observations were chromosomally mediated. All isolates were observed to possess *clpP* (a caseinolytic protease), *cpsA* (a biofilm associated undecaprenyl diphosphate synthase) and *cpsB* (a capsule associated phosphatidate cytidyltransferase). A collagen adhesin precursor (*acm*) was observed in all isolates except sample 1 (ST1421) and the cell wall anchor protein *sgrA* was observed in every isolate except sample 26 (ST202). All isolates in CC17 (except Sample 1 (ST1421)) contained the bile salt hydrolase *bsh* and all CC17 isolates except ERR375031 (ST17) contained the endocarditis/biofilm-associated pilus *ebpC*. The collagen binding microbial surface components recognizing adhesive matrix molecule (MSCRAMM) gene *ecbA* was observed in sample 17 (ST80), ERR375043 (ST16), ERR374741 (ST17), ERR374767 (ST64), and in two ST203 samples (ERR374813 and ERR374914). The collagen adhesin protein *scm* was observed in 14 of 16 ST80 isolates, 5 of 17 ST17 isolates, 2 of 5 ST18, 7 of 9 ST78, 1 of 3 ST192 (sample 21) and in sample 26 (ST202). Finally, *fss3* was observed in 14 of 16 ST80 isolates, all 6 ST203 isolates, in both ST132

isolates, in one isolate each from ST16, ST17, ST64, ST78, ST192, ST787, ST1032, and ST1421 and one unclassified ST isolate (sample 22). Both *fss3* and *scm* were absent from sample 17 (ST80).

Using pangenomic parameters, a core virulome (inclusive of soft-core) whereby a gene is represented in  $\geq 95\%$  ( $\geq 75$  genomes) would yield *acm*, *bopD*, *clpP*, *cpsA*, *cpsB*, *efaA*, *hasC*, *htpB*, *lap*, and *sgrA*, illustrating a key pathenogenic potential for biofilm-associated proteins, capsular polysaccharide biosynthesis, caseinolytic protease, endocarditis specific antigen and collagen adhesins (140,141). When only clinical isolates are considered, the core virulome ( $\geq 64$  genomes) is expanded to include *bsh*, *epbA* and *epbC*, further increasing cardiac virulence and limiting the antibacterial function of bile acids (142,143).

## Phages

Prophages were observed in the chromosome of 65 isolates ( $2.59 \pm 1.02$ ;  $1 \leq n \leq 4$ ) and all were observed to be non-transposable (SI Tables 17-19). The majority (196 of 202) of prophages were predicted to be Siphoviridae, three prophages were observed to be either Siphoviridae or Myoviridae in ERR374794, ERR374824, ERR375046, one prophage (from ERR374806) was observed to be Myoviridae, one prophage (from sample 25) was observed to be Inoviridae, and one prophage (from sample 20) was of unknown taxonomy. Prophages were not observed within any mobilome. One resistance gene, *ermB*, was observed in a prophage of ERR374741, however no other resistance mechanism (antibiotic or metal/biocide) and no virulence factors were observed on any other prophage. Without this *ermB* phage, ERR374741 would be susceptible to lincosamide, macrolide, and streptogramin. The prophage genome within ERR374741 was also observed to contain a probable secondary metabolism mechanism, however the product class could not be determined. One prophage within sample 13, sample

28, and ERR374909 was observed to contain a probable polyketide synthase. When these prophages were searched using Mash (SI Table 19), a set of 4 phages were mapped to 40 of 79 genomes. In the “Cork” samples, *Enterococcus* phage  $\Phi$ FL2A was ubiquitously observed. A total of 17 prophages were observed within 17 BSAC genomes, *Enterococcus* phage EFP01 was observed in 11 genomes, *Listeria* phage B025 was observed in 4 genomes, and *Corynebacterium* phage BFK20 was observed in 2 genomes (Figure 14)

When isolation dates were considered for the BSAC samples, vancomycin resistance did not appear to be affected by the presence of a prophage as both VSE and VRE were represented (57). Both *Corynebacterium* phage BFK20 prophage-containing genomes were isolated in 2009, *Listeria* phage B025 prophage-containing genomes were isolated between 2002 and 2011, and *Enterococcus* phage EFP01 prophage-containing genomes were isolated between 2001 and 2011. In genomes sequenced for this study, *Corynebacterium* phage BFK20 was observed in 1 genome (sample 7), *Enterococcus* phage EFP01 was observed in two genomes (samples 13 and 28), *Enterococcus* phage  $\Phi$ FL2A was observed in sample 11, *Listeria* phage B025 was observed in 3 genomes (samples 6, 12, and 19), and a duo of *Enterococcus* phage  $\Phi$ FL2A and *Listeria* phage B025 was observed in 5 genomes (samples 2, 14, 22, 23, and 24).

A core phage has previously been observed in studies into *Enterococcus faecalis*, where it is implicated in virulence and genome plasticity (144), however, to our knowledge, this trend has not been observed for *E. faecium*.

## Pangenomics

As mentioned above, a pangenome was constructed for this dataset each pangenomic category was populated ( $n_{\text{genes}}$ ; “core pangenome” ( $99\% \leq n_{\text{samples}} \leq 100\%$ ), “soft core

pangenome” ( $95\% \leq n_{\text{samples}} < 99\%$ ), “shell pangenome” ( $15\% \leq n_{\text{samples}} < 95\%$ ), and “cloud pangenome” ( $n_{\text{samples}} < 15\%$ ). The number of genes in the “whole genome” core and soft-core pangenomes and the “chromosomal” core and soft-core pangenomes are relatively unaffected by the mobilome (1324 and 236 genes vs 1327 and 229 genes respectively (SI Table 12)). However, the shell pangenome (2252 genes vs 1550) and the cloud pangenome (3306 genes vs 2762 genes) were more pronouncedly affected.

### Pangenomic enrichment

The core pangenome (inclusive of all isolates) was observed to be enriched ( $P_{\text{BD}} \leq 0.005$ ) for major “house-keeping” and viability functions such as metabolism (*eg.* lipid metabolic process (GO:0006629), protein metabolic process (GO:0019538), carbohydrate metabolic process (GO:0005975), and RNA metabolic process (GO:0016070)), transport (*eg.* protein transport (GO:0015031) and ion transport (GO:0043167)), stress response (GO:0006950), signal transduction (GO:0050794), biosynthesis (GO:0009058), cellular regulation (GO:0065007), and localization (GO:0051179) (SI Table 13). The soft-core pangenome was observed to be enriched for localization and for transmembrane transport (GO:0022857). The shell pangenome was enriched for similar processes as the core genome, namely metabolic processes, transport, stress response, and localisation. The shell pangenome was also significantly enriched for small molecule metabolism (GO:0044281) and transposition (GO:0032196). The cloud pangenome was also enriched for metabolic processes, transport, and signal transduction. There was only one significant purification: transposition in the core genome. These results suggest a dynamic and non-specific evolution of the *E. faecium* pangenome and provides an insight into their genomic organisation and architecture.

## Co-evolution

When vancomycin resistance genes were sampled from the 28 genome dataset, a significant association ( $P \leq 0.005$ ) was observed between *vanAHX* and each of *cadC*, *dinB*, *gmuD*, *gmuR*, *hin*, *hisB*, *nag3*, *sdhB*, and *uxaC* and a significant dissociation with each of *clpC*, *czcD*, *czrA*, *dkgB*, *dps*, *entP*, *fetA*, *fetB*, *fixK*, *fruA*, *gatA*, *lgt*, *mco*, *metB*, *opuCA*, *panE*, *phoP*, *rihB*, and *uvrA* (SI Table 14). These results suggest that *VREfm* carrying *vanA* typically display an increase in carbohydrate processing (via *gmuD*, *gmuR*, *nag3*, *sdhB*, and *uxaC*), cadmium transport (via *cadC*), and DNA repair (via *dinB*) (145–152). Conversely, isolates with a *vanA*+ genotype were also more likely to display genotypes for a decrease in biofilm formation (via *clpC*), lipoprotein synthesis (via *lgt*), copper, iron, and zinc resistance (via *czrA* *fetAB*, and *mco*), pantothenate biosynthesis (via *panE*), quaternary ammonium compound resistance (via *opuCA*), oxidative resistance (via *fetAB* and *opuCA*), and stress response (*clpC*, *dps*, and *uvrA*) (153–162). Comparatively, *vanBWXBYB* was observed to be significantly associated with each of *agaS*, *bfrA*, *dgaR*, *dgoA*, *dgoD*, *epsF*, *fruA*, *gatB*, *gmuE*, *gmuR*, *gpr*, *Int-Tn*, *lacD2*, *manR*, *manX*, *metK*, *mhpE*, *mro*, *mshA*, *noxE*, *sorC*, *ssbA*, and *treP* and dissociated with each of *aes*, *araQ*, *cysM*, *dctM*, *dppC*, *dppE*, *oppB*, and *tuf*. These observations suggest that *vanB*+ *VREfm*, like *vanA*+ *VREfm* possess increases in carbohydrate (specifically sugar) catabolic processing genotypes (via *agaS*, *dgoAD*, *lacD2*, *manRX*, *mshA*, and *treB*), however, an increase was observed in biofilm formation genotype (via *epsF*) and stress response (via *treB*) (163–169). Isolates with a *vanB* phenotype were observed to be decreased in phenotypes for arabinose uptake (via *araQ*), cysteine synthesis (via *cysM*), dicarboxylate transport (via *dctM*) and protein transport (via *dppCE* and *oppB*) (170–174). These protein transport genes are essential for sporulation in other Firmicute species, however, as *Enterococcus* are non-spore forming, their exact role with relation to *vanB* has not been elucidated (174–176).

Interestingly, fructose processing genotypes (*via fruA*, *gatAB*, and *gpr*) are significantly decreased in *vanA*<sup>+</sup> isolates while being significantly increased in *vanB*<sup>+</sup> isolates (SI Table 16), suggesting a possible fructose metabolic niche in *vanB*<sup>+</sup> isolates.

### Rampant recombination

Whole genome alignments and subsequent recombination analyses indicate massive recombination events in across the CC17 genome during its divergence from non CC17 *E. faecium* ancestors (Figure 13; SI Figure 3). The majority of recombination appears to have occurred approximately within the first 50% of the genome.

### Integron evolution

A total of 31 CC17 isolates were observed to possess an intrgtron element, where three isolates (Samples 7, 15, and 22 (all Subcluster  $\delta_3$ )) were observed to possess two (SI Table 20; Figure 15). Integrons followed a phylogenetic distribution in Subclusters  $\delta_3$  and  $\delta_4$ , however all other clusters were observed to be pseudorandomly distributed throughout the phylogeny. Genes-of-interest (resistance or virulence genes) were only observed on integron containing contigs in Subclusters  $\delta_3$  and  $\delta_4$ . All isolates with a gene-of-interest possessed *lsaA* (conferring resistance to clindamycin, quinupristin-dalfopristin, and dalfopristin). Subcluster  $\delta_4$  isolates only possessed *lsaA*. All Subcluster  $\delta_3$  isolates also possessed *efmA* (an efflux pump conferring resistance to macrolides and fluoroquinolones), *chtS* (conferring resistance to chlorhexidine) and *sodA* (conferring resistance to peroxides). A clade within Subcluster  $\delta_3$  (comprising of Samples 6, 12, 19, and 22) also all contained *efaA* (an endocarditis specific antigen) on their integron containing contigs.



## Observation of an unusual contig

Five isolates (Samples 2, 14, 24, and 25 (all assigned to ST80; subcluster  $\delta_4$ ) and Sample 18 (ST80; Cluster  $\beta$ )) possessed a contig with a copy of *arnB*, a UDP-4-amino-4-deoxy-L-arabinose--oxoglutarate aminotransferase involved in Gram-negative Lipid A biosynthesis and polymyxin resistance (177–179). The contig in samples 2, 14, and 24 are identical (SI Figures 4<sub>(a)</sub>-4<sub>(c)</sub>), however those attributed to samples 18 and 25 are distinct (SI Figures 4<sub>(d)</sub>-4<sub>(e)</sub>). Samples 2 and 24 were isolated from the same patient and all three of these samples are phylogenetic neighbours (Figure 5). These contigs have a plethora of cell wall synthesis and lipopolysaccharide modification genes which may play a role in resistance. Of particular interest, sample 17 contained phage sequences suggesting a possible viral mediated horizontal gene transfer. Instances of chromosomal segment transfer between Gram-positive and Gram-negative species (and *vice-versa*) has previously been attributed to phage activity and plasmid integration (180–182).

## **Discussion**

Within Ireland VRE has already spread nationally and is endemic to Irish hospitals (183). The level of VRE in blood stream infections in Ireland has remained at or above 30% since 2005. While some other EU countries have levels above 30%, they have not consistently had this level of VRE BSI over such a wide timeframe. In 2019, >25% of VRE<sub>fm</sub> BSI in eleven additional EU countries have been identified using the ECDC surveillance data. The spread and dominance of VRE<sub>fm</sub> within Irish hospital patients over such a long duration provides us with a unique setting to study the changing dynamics and evolution of VRE<sub>fm</sub>. A recent study



of the global dissemination of *E. faecium* identified that it has two main modes of genomic evolution: the acquisition and loss of genes, including antimicrobial resistance genes, through mobile genetic elements including plasmids, and homologous recombination of the chromosome. Within this global study 261 genomes contained the *vanA* gene. Within the hospital associated A1 clade of *E. faecium* the median number of AMR genes increased in the global study between 2001 and 2019 from 8 to 11 in 2015. Within this study for the *Efm* isolated between 2001 and 2011 the total AMR gene numbers corresponded with the presence of *vanA* rather than year. The vancomycin susceptible isolates and those with the *vanB* gene had less AMR genes than those with the *vanA* gene. *vanA*+ isolates had between 13 and 20 AMR genes, while those with *vanB* or no van gene had a total of between 5 and 12 AMR genes (except one vancomycin resistant isolate with *vanB* ( $n = 15$ ) and one van susceptible isolate with no van genes ( $n = 16$ )). The timeframes for both groups were distributed across the ten years. Those with the highest AMR gene numbers both contained *vanA* and *vanB*. The number of AMR genes from the *vanA* study in 2018/2019 was between 12 and 18, which is consistent with the number from the previous study. Thus, the number of AMR genes in Ireland did not increase over time.

The aims of this study were to compare the pan-genomes, mobilomes and chromosomes of the available genome sequences of vancomycin resistant or susceptible *E. faecium* across the timeframe that VRE (analysed by the ECDC (2002 to 2019)) increased in prevalence from 11.1% to 38.4% in Ireland. To monitor and limit the spread of *VREfm* we need to understand how it evolves and acquires vancomycin resistance, how transmission networks are operating and how *VREfm* is developing resistance to last-line antibiotics.

The same AMR gene was not observed in both chromosome and mobilome in any instance, which indicated genomic control of genetic redundancy (184–186). Vancomycin resistance was observed to be either plasmid mediated (*via vanA*) or chromosomally mediated

(*via vanB*), and rarely a combination of *vanB* on the chromosome and plasmid mediated *vanA* vancomycin resistance was observed. Tetracycline (and probable tigecycline) resistance (*via tet(L)*) was differentially dispersed in clinical isolates, with *tet(L)* being observed in the mobilomes of ST17, ST18, and ST203 and in the chromosomes of ST80 (if present within the genome). Other tetracycline resistance genes implicated in tigecycline resistance, *tet(M)* and *tet(U)*, were observed in addition to *tet(L)* on the chromosome of most ST80 isolates. Interestingly, in contrast to previously reported trends (187,188), increased metal resistance did not positively correlate with increased drug resistance, in fact the opposite was observed, with the “Cork” strains displaying diminished drug resistance and increased metal resistance.

Core-genome MLST corroborated phylogenetic and hierarchical clustering results, suggesting that core populations of *E. faecium* persist in Irish hospitals with frequent evolution towards pathogenicity *via* plasmid mediated transfer of *vanA* or chromosomal incorporation of *vanB* (Figures 5,12). This suggestion is corroborated by the genomic similarity between isolates in different clusters and clades (regardless of isolation year) and by the fact the VSE is observed within Cluster  $\beta$  and clades  $\delta_1$  and  $\delta_4$  (Figure 5).

We determined that a relatively stable “prophagome” exists between isolates (SI Table 17), however, these are not, to our knowledge, implicated in the evolution of resistance or pathogenicity, as observed with closely related species (189,190).

An interesting potential virulence mechanism difference was observed between *vanA*<sup>+</sup> and *vanB*<sup>+</sup> isolates, whereby *vanA*<sup>+</sup> genotypes were unlikely to display a biofilm forming genotype (*via clpC*) and *vanB*<sup>+</sup> isolates were likely to display an *epsF* biofilm forming genotype (SI Table 16). Both vancomycin resistance genotypes displayed increases in carbohydrate catabolism genotypes, however *vanB*<sup>+</sup> isolates were more likely to display specific sugar processing genotypes. Interestingly, *vanA*<sup>+</sup> genotypes were less likely to coevolve with metal resistance, oxidative stress resistance, panthenoate, or lipoprotein

synthesis genotypes. These results suggest that *vanB*<sup>+</sup> isolates are more likely to have evolved due to different stressors than *vanA*<sup>+</sup> isolates. As *vanA* alignments used in this manuscript did not have any point mutations (regardless of the year of isolation), it is likely that a narrow range of mobile genetic elements confer resistance to commensal VSE in the immunocompromised, prompting their pathogenicity.

The significant differences in observed gene density (higher in mobilomes), GC% (lower in mobilomes), gene length (shorter in mobilomes) coupled with insignificant in coding proportions between chromosomes and mobilomes suggest that mobilomes are more likely to evolve either through the acquisition of statistically shorter sequences (while maintaining an equivalent coding potential) or through successive gene fission and/or gene subfunctionalisation events (191–194). While not statistically significant in most samples, coding nucleotide density is, on average, approximately 7% less in mobilomes (SI Tables 11–12), where significantly variant coding proportions are also observed ( $\sigma^2_{\text{chromosomal}} = 1.04$ ;  $\sigma^2_{\text{mobilomal}} = 3.62$ ;  $P = 1.99e^{-10}$  (Levene’s test)). It is possible that these variances may just be an artifact of the highly variant sequences distributed across plasmids when compared to more stable chromosomes, these variances may also underly nucleotide deletion “clean up” processes following subfunctionalisation or fission events indicating evolution towards a more streamline, and therefore less bioeconomic expensive plasmids, thus promoting their propagation (193,195–197).

The pangenome of *E. faecium* is relatively open, with core and soft-core components only accounting for approximately 22% of the pangenome (when the mobilome is included) and for 26.5% when the mobilome is excluded (SI Table 12). This variation, coupled with the non-specific functional enrichments observed within the pangenome (SI Table 13), highlights the rampant evolutionary capabilities in “fixed” genomic biomolecules. This variation may be partially explained by the rampant recombination observed throughout CC17 or the diversity

of prophages observed throughout the respective genomes, however more research is needed to confirm the role of phages on VRE genome (Figures 11-13; SI Figure 3). As observed for phage data, integrons were observed throughout CC17 (SI Table 19; Figure 15). When integrons were observed in phylogenetic blocks, genes-of-interest were observed (SI Table 20; Figure 15). However, as these genes are widely observed in *E. faecium*, it is possible that these integrons are facilitating mobilisation of these genes. While recombination has been reported in *E. faecium* (198,199), the extent of recombination observed during this study has not, to our knowledge, been previously reported. This recombination may have been a driving force in the evolution of *E. faecium* CC17 towards pathogenicity (200). Despite the rampant variation observed between genomes used in this study, chromosomal size, gene content, gene density, and the phylogenetic proximity of each genome remained largely stable throughout the dataset. The relatedness of the VSE and VRE indicates that vancomycin susceptible *Efm* are transferring between patients and then acquiring plasmids to become VRE*Efm* rather than or in addition to the movement of VRE between patients. Stability of *Efm* within Ireland over the 20 years indicates that the increases in VRE across patients is not due to frequent and multiple introductions of different *Efm* into the hospital but rather the maintenance of genomic-related susceptible *Efm* that acquire vancomycin resistance plasmids and the spread of a cohort of highly related VRE*Efm*. Thus, the susceptible and resistant *Efm* are highly related and fixed within the hospital patients. To tackle VRE within Ireland we need to focus on reducing VSE in addition to reducing VRE*Efm*. This requires analysis of the epidemiology of VSE, VRE*Efm* and the plasmids containing the *vanA* gene. While this study provides some understanding of the past, we need to perform studies on the VSE*Efm* and VRE*Efm* within our hospitals to understand the continuing rise of VRE*Efm* and the infection control required to limit the spread.

## Conclusion

895

896 We have demonstrated that the genomic characteristics of the studies *VSEfm* and  
 897 *VREfm* (such as genome size, gene density, and gene count) are relatively stable across space  
 898 and time despite an open and plastic pangenome. The relatedness of the *VSEfm* and *VREfm*  
 899 across time indicates that to reduce or remove *VREfm* from Irish hospitals we must  
 900 concurrently remove *VSEfm*. The problem of vancomycin resistance within these pathogens is  
 901 plasmid mediated *vanA* rather than chromosomally mediated *vanB*.

902

### 903 **Author contributions**

904

| Contribution                         | Author(s)  |
|--------------------------------------|------------|
| Conceptualisation                    | RL, BL, FW |
| Methodology                          | RL, FW     |
| Software                             | RL         |
| Validation                           | RL         |
| Formal Analysis                      | RL         |
| Investigation                        | RL, CM, RM |
| Resources                            | BL, FW     |
| Data Curation                        | RL         |
| Writing – Original Draft Preparation | RL, FW     |
| Writing – Review and Editing         | RL, FW     |
| Visualisation                        | RL         |
| Supervision                          | FW         |
| Project Administration               | FW         |
| Funding                              | FW         |

905

906

### 907 **Conflict-of-interest statement**

908

909 The authors declare no conflicts of interest for this study

910

## 911 **Acknowledgements**

912

913 We wish to thank the staff in the microbiology laboratories at MMUH and the BSAC  
914 surveillance team for making their data available.

915

## 916 **References**

917

- 918 1. Zhou X, Willems RJL, Friedrich AW, Rossen JWA, Bathoorn E. Enterococcus  
919 faecium: From microbiological insights to practical recommendations for infection  
920 control and diagnostics. Antimicrob Resist Infect Control. 2020 Aug 10;9(1).
- 921 2. Howden BP, Holt KE, Lam MMC, Seemann T, Ballard S, Coombs GW, et al.  
922 Genomic insights to control the emergence of vancomycin-resistant enterococci.  
923 MBio. 2013 Aug 13;4(4).
- 924 3. Giannakopoulos X, Sakkas H, Ragos V, Tsiambas E, Bozidis P, Evangelou AM, et al.  
925 Impact of enterococcal urinary tract infections in immuno-compromised-neoplastic  
926 patients. JBUON. 2019;24(5):1768–75.
- 927 4. Chilambi GS, Nordstrom HR, Evans DR, Ferrolino JA, Hayden RT, Marón GM, et al.  
928 Evolution of vancomycin-resistant Enterococcus faecium during colonization and  
929 infection in immunocompromised pediatric patients. Proc Natl Acad Sci [Internet].  
930 2020 May 26 [cited 2021 Aug 17];117(21):11703–14. Available from:  
931 <https://www.pnas.org/content/117/21/11703>
- 932 5. Alghamdi F, Shakir M. The Influence of Enterococcus faecalis as a Dental Root Canal  
933 Pathogen on Endodontic Treatment: A Systematic Review. Cureus [Internet]. 2020  
934 Mar 13 [cited 2021 Aug 17];12(3). Available from: [/pmc/articles/PMC7152576/](https://www.ncbi.nlm.nih.gov/pmc/articles/PMC7152576/)

6. Higuera NIA, Huycke MM. Enterococcal Disease, Epidemiology, and Implications for Treatment. Enterococci From Commensals to Lead Causes Drug Resist Infect [Internet]. 2014 Feb 4 [cited 2021 Aug 17]; Available from: <https://www.ncbi.nlm.nih.gov/books/NBK190429/>
7. Tortosa JA, Hernández-Palazón J. Enterococcus faecalis Meningitis after Spinal Anesthesia. Anesthesiology [Internet]. 2000 Mar 1 [cited 2021 Aug 17];92(3):909–909. Available from: <http://pubs.asahq.org/anesthesiology/article-pdf/92/3/909/399075/0000542-200003000-00060.pdf>
8. Scapellato PG, Ormazabal C, Scapellato JL, Bottaro EG, Rodríguez Brieschke MT, Vidal GI. Meningitis due to vancomycin-resistant Enterococcus faecium successfully treated with combined intravenous and intraventricular chloramphenicol [3]. J Clin Microbiol [Internet]. 2005 Jul [cited 2021 Aug 17];43(7):3578–9. Available from: <https://journals.asm.org/journal/jcm>
9. Tyne D Van, Gilmore MS. Friend Turned Foe: Evolution of Enterococcal Virulence and Antibiotic Resistance. Annu Rev Microbiol [Internet]. 2014 Sep 8 [cited 2021 Aug 17];68:337. Available from: [/pmc/articles/PMC4384341/](https://pmc/articles/PMC4384341/)
10. Tsoulas C, Nathwani D. Review of meta-analyses of vancomycin compared with new treatments for Gram-positive skin and soft-tissue infections: Are we any clearer? Int J Antimicrob Agents. 2015;46(1):1–7.
11. Liu C, Bayer A, Cosgrove SE, Daum RS, Fridkin SK, Gorwitz RJ, et al. Clinical Practice Guidelines by the Infectious Diseases Society of America for the Treatment of Methicillin-Resistant Staphylococcus aureus Infections in Adults and Children: Executive Summary. Clin Infect Dis [Internet]. 2011 Feb 1 [cited 2021 Aug 17];52(3):285–92. Available from: <https://academic.oup.com/cid/article/52/3/285/308819>

12. Munita JM, Arias CA, Murray BE. Enterococcal Endocarditis: Can We Win the War?  
Curr Infect Dis Rep [Internet]. 2012 Aug [cited 2021 Aug 17];14(4):339. Available  
from: /pmc/articles/PMC4433165/
13. Top J, Sinnige JC, Brouwer EC, Werner G, Corander J, Severin JA, et al.  
Identification of a novel genomic island associated with vand-type vancomycin  
resistance in six Dutch vancomycin-resistant enterococcus faecium isolates.  
Antimicrob Agents Chemother. 2018 Mar 1;62(3).
14. Hayakawa K, Marchaim D, Palla M, Gudur UM, Pulluru H, Bathina P, et al.  
Epidemiology of Vancomycin-Resistant Enterococcus faecalis: a Case-Case-Control  
Study. Antimicrob Agents Chemother [Internet]. 2013 Jan [cited 2021 Aug  
17];57(1):49. Available from: /pmc/articles/PMC3535915/
15. Machado H, Seif Y, Sakoulas G, Olson CA, Hefner Y, Anand A, et al. Environmental  
conditions dictate differential evolution of vancomycin resistance in Staphylococcus  
aureus. Commun Biol 2021 41 [Internet]. 2021 Jun 25 [cited 2021 Aug 17];4(1):1–12.  
Available from: <https://www.nature.com/articles/s42003-021-02339-z>
16. Patel R. Clinical impact of vancomycin-resistant enterococci. J Antimicrob Chemother  
[Internet]. 2003 [cited 2021 Aug 17];51:13–21. Available from:  
[https://academic.oup.com/jac/article/51/suppl\\_3/iii13/2473485](https://academic.oup.com/jac/article/51/suppl_3/iii13/2473485)
17. Correa-Martinez C, Tönnies H, Froböse N, Mellmann A, Kampmeier S. Transmission  
of Vancomycin-Resistant Enterococci in the Hospital Setting: Uncovering the Patient-  
Environment Interplay. Microorganisms [Internet]. 2020 Feb 1 [cited 2021 Aug  
17];8(2). Available from: <https://pubmed.ncbi.nlm.nih.gov/32024001/>
18. Courvalin P. Vancomycin Resistance in Gram-Positive Cocci. Clin Infect Dis  
[Internet]. 2006 Jan 1 [cited 2021 Aug 18];42(Supplement\_1):S25–34. Available from:  
[https://academic.oup.com/cid/article/42/Supplement\\_1/S25/275393](https://academic.oup.com/cid/article/42/Supplement_1/S25/275393)



- 985 19. Arias CA, Contreras GA, Murray BE. Management of multidrug-resistant  
986 enterococcal infections. Clin Microbiol Infect [Internet]. 2010 [cited 2021 Aug  
987 18];16(6):555–62. Available from: /pmc/articles/PMC3686902/
- 988 20. O’Driscoll T, Crank CW. Vancomycin-resistant enterococcal infections:  
989 epidemiology, clinical manifestations, and optimal management. Infect Drug Resist  
990 [Internet]. 2015 Jul 24 [cited 2021 Aug 17];8:217. Available from:  
991 /pmc/articles/PMC4521680/
- 992 21. Leavis HL, Bonten MJ, Willems RJ. Identification of high-risk enterococcal clonal  
993 complexes: global dispersion and antibiotic resistance. Curr Opin Microbiol. 2006  
994 Oct;9(5):454–60.
- 995 22. Getachew Y, Hassan L, Zakaria Z, Abdul Aziz S. Genetic variability of vancomycin-  
996 resistant enterococcus faecium and enterococcus faecalis isolates from humans,  
997 chickens, and pigs in malaysia. Appl Environ Microbiol [Internet]. 2013 Aug [cited  
998 2021 Aug 18];79(15):4528–33. Available from:  
999 [http://www.fas.usda.gov/dlp/circular/2011/livestock\\_poultry](http://www.fas.usda.gov/dlp/circular/2011/livestock_poultry)
- 1000 23. Leclercq R, Derlot E, Duval J, Courvalin P. Plasmid-Mediated Resistance to  
1001 Vancomycin and Teicoplanin in Enterococcus Faecium. N Engl J Med. 1988 Jul  
1002 21;319(3):157–61.
- 1003 24. Yim J, Smith JR, Rybak MJ. Role of Combination Antimicrobial Therapy for  
1004 Vancomycin-Resistant Enterococcus faecium Infections: Review of the Current  
1005 Evidence. Pharmacother J Hum Pharmacol Drug Ther [Internet]. 2017 May 1 [cited  
1006 2021 Aug 17];37(5):579–92. Available from:  
1007 <https://accpjournals.onlinelibrary.wiley.com/doi/full/10.1002/phar.1922>
- 1008 25. Zhong Z, Zhang W, Song Y, Liu W, Xu H, Xi X, et al. Comparative genomic analysis  
1009 of the genus Enterococcus. Microbiol Res. 2017 Mar 1;196:95–105.

- 1010 26. Zhong Z, Kwok L-Y, Hou Q, Sun Y, Li W, Zhang H, et al. Comparative genomic  
1011 analysis revealed great plasticity and environmental adaptation of the genomes of  
1012 *Enterococcus faecium*. BMC Genomics [Internet]. 2019 Jul 22 [cited 2021 Aug  
1013 18];20(1). Available from: /pmc/articles/PMC6647102/
- 1014 27. Sadowy E, Gawryszewska I, Kuch A, Żabicka D, Hryniewicz W. The changing  
1015 epidemiology of VanB *Enterococcus faecium* in Poland. Eur J Clin Microbiol Infect  
1016 Dis 2018 375 [Internet]. 2018 Feb 13 [cited 2021 Aug 24];37(5):927–36. Available  
1017 from: <https://link.springer.com/article/10.1007/s10096-018-3209-7>
- 1018 28. Paoletti C, Foglia G, Princivalli MS, Magi G, Guaglianone E, Donelli G, et al. Co-  
1019 transfer of vanA and aggregation substance genes from *Enterococcus faecalis* isolates  
1020 in intra- and interspecies matings. J Antimicrob Chemother. 2007 May;59(5):1005–9.
- 1021 29. Handwerger S, Pucci MJ, Volk KJ, Liu J, Lee MS. The cytoplasmic peptidoglycan  
1022 precursor of vancomycin-resistant *Enterococcus faecalis* terminates in lactate. J  
1023 Bacteriol [Internet]. 1992 [cited 2021 Aug 18];174(18):5982–4. Available from:  
1024 <https://journals.asm.org/journal/jb>
- 1025 30. Dutka-Malen S, Mohnas C, Arthur M, Courvalin P. The VANA glycopeptide  
1026 resistance protein is related to d-alanyl-d-alanine ligase cell wall biosynthesis  
1027 enzymes. Mol Gen Genet MGG 1990 2243 [Internet]. 1990 Dec [cited 2021 Aug  
1028 18];224(3):364–72. Available from:  
1029 <https://link.springer.com/article/10.1007/BF00262430>
- 1030 31. Roper DI, Huyton T, Vagin A, Dodson G. The molecular basis of vancomycin  
1031 resistance in clinically relevant Enterococci: Crystal structure of d-alanyl-d-lactate  
1032 ligase (VanA). Proc Natl Acad Sci [Internet]. 2000 Aug 1 [cited 2021 Aug  
1033 18];97(16):8921–5. Available from: <https://www.pnas.org/content/97/16/8921>
- 1034 32. Clark N, Cooksey R, Hill B, Swenson J, Tenover F. Characterization of glycopeptide-

- 1035 resistant enterococci from U.S. hospitals. Antimicrob Agents Chemother [Internet].
- 1036 1993 [cited 2021 Aug 18];37(11):2311–7. Available from:
- 1037 <https://pubmed.ncbi.nlm.nih.gov/8285611/>
- 1038 33. Arthur M, Courvalin P. Genetics and mechanisms of glycopeptide resistance in
- 1039 enterococci. Antimicrob Agents Chemother [Internet]. 1993 [cited 2021 Aug
- 1040 18];37(8):1563–71. Available from: <https://pubmed.ncbi.nlm.nih.gov/8215264/>
- 1041 34. Il JP, Wee GL, Jong HS, Kyung WL, Gun JW. VanB phenotype-vanA genotype
- 1042 Enterococcus faecium with heterogeneous expression of teicoplanin resistance. J Clin
- 1043 Microbiol [Internet]. 2008 Sep [cited 2021 Aug 18];46(9):3091–3. Available from:
- 1044 <https://journals.asm.org/journal/jcm>
- 1045 35. Turner RJ, Huang L-N, Viti C, Mengoni A. Metal-Resistance in Bacteria: Why Care?
- 1046 Genes (Basel) [Internet]. 2020 Dec 1 [cited 2021 Aug 18];11(12):1–4. Available from:
- 1047 </pmc/articles/PMC7764034/>
- 1048 36. Chen J, Li J, Zhang H, Shi W, Liu Y. Bacterial Heavy-Metal and Antibiotic Resistance
- 1049 Genes in a Copper Tailing Dam Area in Northern China. Front Microbiol.
- 1050 2019;0(AUG):1916.
- 1051 37. Li L-G, Xia Y, Zhang T. Co-occurrence of antibiotic and metal resistance genes
- 1052 revealed in complete genome collection. ISME J 2017 113 [Internet]. 2016 Dec 13
- 1053 [cited 2021 Aug 18];11(3):651–62. Available from:
- 1054 <https://www.nature.com/articles/ismej2016155>
- 1055 38. Liu H, Li M, Dao TD, Liu Y, Zhou W, Liu L, et al. Design of PdAu alloy plasmonic
- 1056 nanoparticles for improved catalytic performance in CO2 reduction with visible light
- 1057 irradiation. Vol. 26, Nano Energy. 2016.
- 1058 39. Maillard J-Y. Antimicrobial biocides in the healthcare environment: efficacy, usage,
- 1059 policies, and perceived problems. Ther Clin Risk Manag [Internet]. 2005 Dec [cited

- 1060 2021 Aug 18];1(4):307. Available from: /pmc/articles/PMC1661639/
- 1061 40. Wilkinson L, White R, Chipman J. Silver and nanoparticles of silver in wound  
1062 dressings: a review of efficacy and safety. J Wound Care [Internet]. 2011 [cited 2021  
1063 Aug 18];20(11):543–9. Available from: <https://pubmed.ncbi.nlm.nih.gov/22240850/>
- 1064 41. Grass G, Rensing C, Solioz M. Metallic Copper as an Antimicrobial Surface. Appl  
1065 Environ Microbiol [Internet]. 2011 Mar [cited 2021 Aug 18];77(5):1541. Available  
1066 from: /pmc/articles/PMC3067274/
- 1067 42. Lebreton F, Schaik W van, Sanguinetti M, Posteraro B, Torelli R, Bras F Le, et al.  
1068 AsrR Is an Oxidative Stress Sensing Regulator Modulating Enterococcus faecium  
1069 Opportunistic Traits, Antimicrobial Resistance, and Pathogenicity. PLOS Pathog  
1070 [Internet]. 2012 Aug [cited 2021 Aug 18];8(8):e1002834. Available from:  
1071 <https://journals.plos.org/plospathogens/article?id=10.1371/journal.ppat.1002834>
- 1072 43. Hasman H, Aarestrup FM. tcrb, a gene conferring transferable copper resistance in  
1073 Enterococcus faecium: Occurrence, transferability, and linkage to macrolide and  
1074 glycopeptide resistance. Antimicrob Agents Chemother [Internet]. 2002 [cited 2021  
1075 Aug 18];46(5):1410–6. Available from: <https://journals.asm.org/journal/aac>
- 1076 44. Pidot S, Gao W, Buultjens A, Monk I, Guerillot R, Carter G, et al. Increasing tolerance  
1077 of hospital Enterococcus faecium to hand-wash alcohols. Increasing Toler Hosp  
1078 Enterococcus faecium to handwash alcohols. 2016;053728.
- 1079 45. Comerlato CB, Resende MCC de, Caierão J, d’Azevedo PA. Presence of virulence  
1080 factors in Enterococcus faecalis and Enterococcus faecium susceptible and resistant to  
1081 vancomycin. Mem Inst Oswaldo Cruz [Internet]. 2013 [cited 2021 Aug  
1082 18];108(5):590. Available from: /pmc/articles/PMC3970601/
- 1083 46. Haghi F, Lohrasbi V, Zeighami H. High incidence of virulence determinants,  
1084 aminoglycoside and vancomycin resistance in enterococci isolated from hospitalized

1085 patients in Northwest Iran. BMC Infect Dis 2019 191 [Internet]. 2019 Aug 27 [cited  
1086 2021 Aug 18];19(1):1–10. Available from:  
1087 <https://bmcinfectdis.biomedcentral.com/articles/10.1186/s12879-019-4395-3>

1088 47. Biswas PP, Dey S, Adhikari L, Sen A. Virulence Markers of Vancomycin Resistant  
1089 Enterococci Isolated from Infected and Colonized Patients. J Glob Infect Dis  
1090 [Internet]. 2014 Oct 1 [cited 2021 Aug 18];6(4):157. Available from:  
1091 </pmc/articles/PMC4265831/>

1092 48. Kim EB, Marco ML. Nonclinical and clinical enterococcus faecium strains, but not  
1093 enterococcus faecalis strains, have distinct structural and functional genomic features.  
1094 Appl Environ Microbiol [Internet]. 2014 Jan [cited 2021 Aug 18];80(1):154–65.  
1095 Available from: <http://dx.doi.org/10.1128>

1096 49. van Hal SJ, Willems RJL, Gouliouris T, Ballard SA, Coque TM, Hammerum AM, et  
1097 al. The global dissemination of hospital clones of Enterococcus faecium. Genome Med  
1098 2021 131 [Internet]. 2021 Mar 30 [cited 2021 Aug 18];13(1):1–12. Available from:  
1099 <https://genomemedicine.biomedcentral.com/articles/10.1186/s13073-021-00868-0>

1100 50. Banfield And JF, Young M. Variety-the splice of life-in microbial communities.  
1101 Science (80- ). 2009 Nov 27;326(5957):1198–9.

1102 51. Koskella B, Brockhurst MA. Bacteria–phage coevolution as a driver of ecological and  
1103 evolutionary processes in microbial communities. FEMS Microbiol Rev [Internet].  
1104 2014 Sep 1 [cited 2021 Aug 18];38(5):916–31. Available from:  
1105 <https://academic.oup.com/femsre/article/38/5/916/497097>

1106 52. Broniewski JM, Meaden S, Paterson S, Buckling A, Westra ER. The effect of phage  
1107 genetic diversity on bacterial resistance evolution. ISME J 2020 143 [Internet]. 2020  
1108 Jan 2 [cited 2021 Aug 18];14(3):828–36. Available from:  
1109 <https://www.nature.com/articles/s41396-019-0577-7>

- 1110 53. Bonilla N, Santiago T, Marcos P, Urdaneta M, Santo Domingo J, Toranzos GA.  
1111 Enterophages, a group of phages infecting *Enterococcus faecalis*, and their potential as  
1112 alternate indicators of human faecal contamination. *Water Sci Technol*.  
1113 2010;61(2):293–300.
- 1114 54. Lee D, Im J, Na H, Ryu S, Yun C-H, Han SH. The Novel *Enterococcus* Phage  
1115 vB\_EfaS\_HEf13 Has Broad Lytic Activity Against Clinical Isolates of *Enterococcus*  
1116 *faecalis*. *Front Microbiol*. 2019 Dec 17;0:2877.
- 1117 55. Wandro S, Oliver A, Gallagher T, Weihe C, England W, Martiny JBH, et al.  
1118 Predictable Molecular Adaptation of Coevolving *Enterococcus faecium* and Lytic  
1119 Phage EfV12-phi1. *Front Microbiol*. 2019;0(JAN):3192.
- 1120 56. Whelan F, Rusilowicz M, McNerney J. Coinfinder: Detecting significant associations  
1121 and dissociations in pangenomes. *Microb Genomics* [Internet]. 2020 [cited 2021 Aug  
1122 18];6(3). Available from: <https://pubmed.ncbi.nlm.nih.gov/32100706/>
- 1123 57. Raven KE, Reuter S, Gouliouris T, Reynolds R, Russell JE, Brown NM, et al.  
1124 Genome-based characterization of hospital-adapted *Enterococcus faecalis* lineages.  
1125 *Nat Microbiol* 2016 13 [Internet]. 2016 Feb 8 [cited 2021 Aug 24];1(3):1–7. Available  
1126 from: <https://www.nature.com/articles/nmicrobiol201533>
- 1127 58. Leinonen R, Sugawara H, Shumway M. The Sequence Read Archive. *Nucleic Acids*  
1128 *Res* [Internet]. 2011 Jan [cited 2021 Aug 18];39(Database issue):D19. Available from:  
1129 </pmc/articles/PMC3013647/>
- 1130 59. Krueger F. Babraham Bioinformatics - Trim Galore! [Internet]. 2012 [cited 2021 Jan  
1131 16]. Available from: [https://www.bioinformatics.babraham.ac.uk/projects/trim\\_galore/](https://www.bioinformatics.babraham.ac.uk/projects/trim_galore/)
- 1132 60. Martin M. Cutadapt removes adapter sequences from high-throughput sequencing  
1133 reads. *EMBnet.journal* [Internet]. 2011 May 2 [cited 2021 Jan 16];17(1):10. Available  
1134 from: <http://www-huber.embl.de/users/an->

- 1135 61. Andrews S, Krueger F, Seconds-Pichon A, Biggins F, Wingett S. FastQC. A quality  
1136 control tool for high throughput sequence data. Babraham Bioinformatics. 2015 [cited  
1137 2021 Aug 18];1(1):undefined-undefined. Available from:  
1138 [https://www.mendeley.com/catalogue/8057171e-e700-36a0-b936-](https://www.mendeley.com/catalogue/8057171e-e700-36a0-b936-1c307058462d/?utm_source=desktop&utm_medium=1.19.8&utm_campaign=open_catalog&userDocumentId=%7B124edc8f-5459-3c1b-a449-8ab9bc3e95f8%7D)  
1139 [1c307058462d/?utm\\_source=desktop&utm\\_medium=1.19.8&utm\\_campaign=open\\_ca](https://www.mendeley.com/catalogue/8057171e-e700-36a0-b936-1c307058462d/?utm_source=desktop&utm_medium=1.19.8&utm_campaign=open_catalog&userDocumentId=%7B124edc8f-5459-3c1b-a449-8ab9bc3e95f8%7D)  
1140 [talog&userDocumentId=%7B124edc8f-5459-3c1b-a449-8ab9bc3e95f8%7D](https://www.mendeley.com/catalogue/8057171e-e700-36a0-b936-1c307058462d/?utm_source=desktop&utm_medium=1.19.8&utm_campaign=open_catalog&userDocumentId=%7B124edc8f-5459-3c1b-a449-8ab9bc3e95f8%7D)
- 1141 62. Wick RR, Judd LM, Gorrie CL, Holt KE. Completing bacterial genome assemblies  
1142 with multiplex MinION sequencing. Microb Genomics. 2017 Oct 1;3(10):e000132.
- 1143 63. Bankevich A, Nurk S, Antipov D, Gurevich AA, Dvorkin M, Kulikov AS, et al.  
1144 SPAdes: A new genome assembly algorithm and its applications to single-cell  
1145 sequencing. J Comput Biol. 2012 May 1;19(5):455–77.
- 1146 64. Langmead B, Salzberg SL. Fast gapped-read alignment with Bowtie 2. Nat Methods  
1147 [Internet]. 2012 [cited 2017 Sep 6];9(4):357–9. Available from:  
1148 <http://www.nature.com/articles/nmeth.1923>
- 1149 65. Walker BJ, Abeel T, Shea T, Priest M, Abouelliel A, Sakthikumar S, et al. Pilon: An  
1150 Integrated Tool for Comprehensive Microbial Variant Detection and Genome  
1151 Assembly Improvement. PLoS One [Internet]. 2014 Nov 19 [cited 2021 Aug  
1152 18];9(11):e112963. Available from:  
1153 <https://journals.plos.org/plosone/article?id=10.1371/journal.pone.0112963>
- 1154 66. Camacho C, Coulouris G, Avagyan V, Ma N, Papadopoulos J, Bealer K, et al.  
1155 BLAST+: architecture and applications. BMC Bioinformatics [Internet]. 2009 Dec 15  
1156 [cited 2017 Aug 1];10(1):421. Available from: [http://www.biomedcentral.com/1471-](http://www.biomedcentral.com/1471-2105/10/421)  
1157 [2105/10/421](http://www.biomedcentral.com/1471-2105/10/421)
- 1158 67. Altschul SSF, Gish W, Miller W, Myers EEW, Lipman DJD. Basic local alignment  
1159 search tool [Internet]. Journal of Molecular Biology Oct, 1990 p. 403–10. Available

- 1160 from: <https://linkinghub.elsevier.com/retrieve/pii/S0022283605803602>
- 1161 68. Li H, Handsaker B, Wysoker A, Fennell T, Ruan J, Homer N, et al. The Sequence  
1162 Alignment/Map format and SAMtools. *Bioinformatics* [Internet]. 2009 Aug 15 [cited  
1163 2018 Sep 12];25(16):2078–9. Available from:  
1164 [https://academic.oup.com/bioinformatics/article-](https://academic.oup.com/bioinformatics/article-lookup/doi/10.1093/bioinformatics/btp352)  
1165 [lookup/doi/10.1093/bioinformatics/btp352](https://academic.oup.com/bioinformatics/article-lookup/doi/10.1093/bioinformatics/btp352)
- 1166 69. Parks DH, Imelfort M, Skennerton CT, Hugenholtz P, Tyson GW. CheckM: assessing  
1167 the quality of microbial genomes recovered from isolates, single cells, and  
1168 metagenomes. *Genome Res* [Internet]. 2015 Jul 1 [cited 2021 Aug 18];25(7):1043.  
1169 Available from: [/pmc/articles/PMC4484387/](https://pmc/articles/PMC4484387/)
- 1170 70. Jolley KA, Maiden MCJ. BIGSdb: Scalable analysis of bacterial genome variation at  
1171 the population level. *BMC Bioinformatics* [Internet]. 2010 Dec 10 [cited 2020 Apr  
1172 14];11(1):595. Available from:  
1173 <https://bmcbioinformatics.biomedcentral.com/articles/10.1186/1471-2105-11-595>
- 1174 71. Seemann T. GitHub - tseemann/mlst: Scan contig files against PubMLST typing  
1175 schemes [Internet]. 2014 [cited 2021 Aug 18]. Available from:  
1176 <https://github.com/tseemann/mlst>
- 1177 72. Jolley K, Bray J, Maiden M. Open-access bacterial population genomics: BIGSdb  
1178 software, the PubMLST.org website and their applications. *Wellcome open Res*  
1179 [Internet]. 2018 [cited 2021 Aug 26];3. Available from:  
1180 <https://pubmed.ncbi.nlm.nih.gov/30345391/>
- 1181 73. Schwengers O, Barth P, Falgenhauer L, Hain T, Chakraborty T, Goesmann A. Platon:  
1182 identification and characterization of bacterial plasmid contigs in short-read draft  
1183 assemblies exploiting protein sequence-based replicon distribution scores. *Microb*  
1184 *genomics* [Internet]. 2020 [cited 2021 Aug 18];6(10):1–12. Available from:



- 1185 <https://pubmed.ncbi.nlm.nih.gov/32579097/>
- 1186 74. Angelopoulou A, Warda A, O'Connor P, Stockdale S, Shkoporov A, Field D, et al.  
1187 Diverse Bacteriocins Produced by Strains From the Human Milk Microbiota. *Front*  
1188 *Microbiol* [Internet]. 2020 May 19 [cited 2021 Aug 24];11. Available from:  
1189 <https://pubmed.ncbi.nlm.nih.gov/32508758/>
- 1190 75. Ondov BD, Treangen TJ, Melsted P, Mallonee AB, Bergman NH, Koren S, et al.  
1191 Mash: fast genome and metagenome distance estimation using MinHash. *Genome Biol*  
1192 2016 171 [Internet]. 2016 Jun 20 [cited 2021 Aug 18];17(1):1–14. Available from:  
1193 <https://genomebiology.biomedcentral.com/articles/10.1186/s13059-016-0997-x>
- 1194 76. Galata V, Fehlmann T, Backes C, Keller A. PLSDb: a resource of complete bacterial  
1195 plasmids. *Nucleic Acids Res* [Internet]. 2019 [cited 2021 Nov 2];47(D1):D195–202.  
1196 Available from: <https://pubmed.ncbi.nlm.nih.gov/30380090/>
- 1197 77. Seemann T. Prokka: Rapid prokaryotic genome annotation. *Bioinformatics*. 2014 Jul  
1198 15;30(14):2068–9.
- 1199 78. Hyatt D, Chen G-L, LoCascio PF, Land ML, Larimer FW, Hauser LJ. Prodigal:  
1200 prokaryotic gene recognition and translation initiation site identification. *BMC*  
1201 *Bioinforma* 2010 111 [Internet]. 2010 Mar 8 [cited 2021 Aug 18];11(1):1–11.  
1202 Available from: [https://bmcbioinformatics.biomedcentral.com/articles/10.1186/1471-](https://bmcbioinformatics.biomedcentral.com/articles/10.1186/1471-2105-11-119)  
1203 [2105-11-119](https://bmcbioinformatics.biomedcentral.com/articles/10.1186/1471-2105-11-119)
- 1204 79. Laslett D, Canback B. ARAGORN, a program to detect tRNA genes and tmRNA  
1205 genes in nucleotide sequences. *Nucleic Acids Res* [Internet]. 2004 [cited 2021 Aug  
1206 18];32(1):11–6. Available from: <https://pubmed.ncbi.nlm.nih.gov/14704338/>
- 1207 80. Skennerton C. minced: Mining CRISPRs in Environmental Datasets [Internet]. 2013  
1208 [cited 2021 Aug 18]. Available from: <https://github.com/ctSkennerton/minced>
- 1209 81. Petersen TN, Brunak S, von Heijne G, Nielsen H. SignalP 4.0: discriminating signal

- 1210 peptides from transmembrane regions. 2011 Sep 29 [cited 2017 Sep 6];8(10):785–6.
- 1211 Available from: <http://www.nature.com/doifinder/10.1038/nmeth.1701>
- 1212 82. Finn RD, Clements J, Eddy SR. HMMER web server: interactive sequence similarity
- 1213 searching. Nucleic Acids Res [Internet]. 2011 Jul 1 [cited 2021 Aug 18];39(Web
- 1214 Server issue):W29. Available from: [/pmc/articles/PMC3125773/](http://pmc/articles/PMC3125773/)
- 1215 83. Stajich J, Block D, Boulez K, Brenner S, Chervitz S, Dagdigian C, et al. The Bioperl
- 1216 toolkit: Perl modules for the life sciences. Genome Res [Internet]. 2002 Oct 1 [cited
- 1217 2021 Aug 18];12(10):1611–8. Available from:
- 1218 <https://pubmed.ncbi.nlm.nih.gov/12368254/>
- 1219 84. Seemann T. barrnap: Bacterial ribosomal RNA predictor [Internet]. 2013 [cited 2021
- 1220 Aug 18]. Available from: <https://github.com/tseemann/barrnap>
- 1221 85. Jones P, Binns D, Chang H-Y, Fraser M, Li W, Mcanulla C, et al. InterProScan 5:
- 1222 genome-scale protein function classification. 2014;30(9):1236–40.
- 1223 86. Bateman A, Coin L, Durbin R, Finn RD, Hollich V, Griffiths-Jones S, et al. The Pfam
- 1224 protein families database. Nucleic Acids Res [Internet]. 2004 Jan 1 [cited 2019 Sep
- 1225 29];32(90001):138D – 141. Available from:
- 1226 <http://www.ncbi.nlm.nih.gov/pubmed/14681378>
- 1227 87. Ashburner M, Ball CA, Blake JA, Botstein D, Butler H, Cherry JM, et al. Gene
- 1228 ontology: tool for the unification of biology. The Gene Ontology Consortium. Nat
- 1229 Genet [Internet]. 2000 May [cited 2018 Sep 13];25(1):25–9. Available from:
- 1230 <http://www.ncbi.nlm.nih.gov/pubmed/10802651>
- 1231 88. Carroll LM, Larralde M, Fleck JS, Ponnudurai R, Milanese A, Cappio E, et al.
- 1232 Accurate de novo identification of biosynthetic gene clusters with GECCO. bioRxiv
- 1233 [Internet]. 2021 May 4 [cited 2021 Aug 25];2021.05.03.442509. Available from:
- 1234 <https://www.biorxiv.org/content/10.1101/2021.05.03.442509v1>

- 1235 89. Blin K, Shaw S, Steinke K, Villebro R, Ziemert N, Lee SY, et al. antiSMASH 5.0:  
1236 updates to the secondary metabolite genome mining pipeline. *Nucleic Acids Res*  
1237 [Internet]. 2019 Jul 2 [cited 2021 Aug 18];47(W1):W81–7. Available from:  
1238 <https://academic.oup.com/nar/article/47/W1/W81/5481154>
- 1239 90. Johansson MHK, Bortolaia V, Tansirichaiya S, Aarestrup FM, Roberts AP, Petersen  
1240 TN. Detection of mobile genetic elements associated with antibiotic resistance in  
1241 *Salmonella enterica* using a newly developed web tool: MobileElementFinder. *J*  
1242 *Antimicrob Chemother* [Internet]. 2021 Jan 1 [cited 2021 Sep 1];76(1):101–9.  
1243 Available from: <https://academic.oup.com/jac/article/76/1/101/5917579>
- 1244 91. Seemann. T. ABRicate: mass screening of contigs for antimicrobial resistance or  
1245 virulence genes. [Internet]. 2014 [cited 2021 Aug 18]. Available from:  
1246 [https://github.com/tseemann/abricate/commits/master?after=955d402a23371a61bfca48](https://github.com/tseemann/abricate/commits/master?after=955d402a23371a61bfca48f1b9e0d30ac724e6ef+209&branch=master)  
1247 [f1b9e0d30ac724e6ef+209&branch=master](https://github.com/tseemann/abricate/commits/master?after=955d402a23371a61bfca48f1b9e0d30ac724e6ef+209&branch=master)
- 1248 92. Alcock BP, Raphenya AR, Lau TTY, Tsang KK, Bouchard M, Edalatmand A, et al.  
1249 CARD 2020: antibiotic resistome surveillance with the comprehensive antibiotic  
1250 resistance database. *Nucleic Acids Res*. 2020 Jan 8;48(D1):D517–25.
- 1251 93. Zankari E, Allesøe R, Joensen KG, Cavaco LM, Lund O, Aarestrup FM. PointFinder:  
1252 a novel web tool for WGS-based detection of antimicrobial resistance associated with  
1253 chromosomal point mutations in bacterial pathogens. *J Antimicrob Chemother*  
1254 [Internet]. 2017 Oct 1 [cited 2021 Aug 25];72(10):2764–8. Available from:  
1255 <https://academic.oup.com/jac/article/72/10/2764/3979530>
- 1256 94. Chen L, Yang J, Yu J, Yao Z, Sun L, Shen Y, et al. VFDB: a reference database for  
1257 bacterial virulence factors. *Nucleic Acids Res* [Internet]. 2005 Jan 1 [cited 2021 Aug  
1258 18];33(Database issue). Available from: <https://pubmed.ncbi.nlm.nih.gov/15608208/>
- 1259 95. Pal C, Bengtsson-Palme J, Rensing C, Kristiansson E, Larsson DGJ. BacMet:

- 1260           antibacterial biocide and metal resistance genes database [Internet]. Nucleic Acids
- 1261           Research Oxford University Press; Jan 1, 2014 p. D737. Available from:
- 1262           /pmc/articles/PMC3965030/
- 1263   96.   Rice P, Longden L, Bleasby A. EMBOSS: the European Molecular Biology Open
- 1264           Software Suite. Trends Genet [Internet]. 2000 Jun 1 [cited 2021 Nov 22];16(6):276–7.
- 1265           Available from: <https://pubmed.ncbi.nlm.nih.gov/10827456/>
- 1266   97.   Welch BL. The generalization of “Student’s” problem with several different
- 1267           population variances are involved. Biometrika [Internet]. 1947 Jan 1 [cited 2021 Jan
- 1268           16];34(1–2):28–35. Available from: [https://academic.oup.com/biomet/article-](https://academic.oup.com/biomet/article-lookup/doi/10.1093/biomet/34.1-2.28)
- 1269           lookup/doi/10.1093/biomet/34.1-2.28
- 1270   98.   Student. The Probable Error of a Mean. Biometrika. 1908 Mar;6(1):1.
- 1271   99.   Bonferroni C. Teoria statistica delle classi e calcolo delle probabilita. Pubbl del R Ist
- 1272           Super di Sci Econ e Commerciali di Firenze [Internet]. 1936 [cited 2021 Apr 20];8:3–
- 1273           62. Available from: <https://ci.nii.ac.jp/naid/20001561442>
- 1274   100.   Dunn OJ. Multiple Comparisons among Means. J Am Stat Assoc [Internet]. 1961 Mar
- 1275           [cited 2019 Feb 12];56(293):52–64. Available from:
- 1276           <http://www.tandfonline.com/doi/abs/10.1080/01621459.1961.10482090>
- 1277   101.   Benjamin DJ, Berger JO, Johannesson M, Nosek BA, Wagenmakers EJ, Berk R, et al.
- 1278           Redefine statistical significance [Internet]. Vol. 2, Nature Human Behaviour. Nature
- 1279           Publishing Group; 2018 [cited 2021 Apr 27]. p. 6–10. Available from:
- 1280           [www.nature.com/naturehumanbehaviour](http://www.nature.com/naturehumanbehaviour)
- 1281   102.   Kolmogorov AN. Sulla determinazione empirica di una legge di distribuzione –
- 1282           ScienceOpen. Inst Ital Attuari, Giorn [Internet]. 1933 [cited 2021 May 5]; Available
- 1283           from: [https://www.scienceopen.com/document?vid=c3c08573-63b2-4153-a72e-](https://www.scienceopen.com/document?vid=c3c08573-63b2-4153-a72e-97bd1b3663a0)
- 1284           97bd1b3663a0

- 1285 103. Lilliefors HW. On the Kolmogorov-Smirnov Test for Normality with Mean and  
1286 Variance Unknown. J Am Stat Assoc. 1967;62(318):399–402.
- 1287 104. Bastian M, Heymann S, Jacomy M. Gephi: an open source software for exploring and  
1288 manipulating networks. In: International AAAI Conference on Weblogs and Social  
1289 Media. 2009.
- 1290 105. Fruchterman TMJ, Reingold EM. Graph drawing by force-directed placement. Softw  
1291 Pract Exp [Internet]. 1991 Nov 1 [cited 2021 Nov 10];21(11):1129–64. Available  
1292 from: <https://onlinelibrary.wiley.com/doi/full/10.1002/spe.4380211102>
- 1293 106. Page AJ, Cummins CA, Hunt M, Wong VK, Reuter S, Holden MTG, et al. Roary:  
1294 Rapid large-scale prokaryote pan genome analysis. Bioinformatics. 2015 May  
1295 25;31(22):3691–3.
- 1296 107. Löytynoja A. Phylogeny-aware alignment with PRANK. Methods Mol Biol [Internet].  
1297 2014 [cited 2020 Aug 10];1079:155–70. Available from:  
1298 <https://pubmed.ncbi.nlm.nih.gov/24170401/>
- 1299 108. Fisher RA. On the “Probable Error” of a Coefficient of Correlation Deduced from a  
1300 Small Sample. Metron. 1921;1:3–32.
- 1301 109. Klopfenstein D V., Zhang L, Pedersen BS, Ramírez F, Warwick Vesztrocy A, Naldi  
1302 A, et al. GOATOOLS: A Python library for Gene Ontology analyses. Sci Rep  
1303 [Internet]. 2018 Dec 18 [cited 2018 Dec 16];8(1):10872. Available from:  
1304 <http://www.nature.com/articles/s41598-018-28948-z>
- 1305 110. Capella-Gutierrez S, Silla-Martinez JM, Gabaldon T. trimAl: a tool for automated  
1306 alignment trimming in large-scale phylogenetic analyses. Bioinformatics [Internet].  
1307 2009 Aug 1 [cited 2018 Sep 12];25(15):1972–3. Available from:  
1308 [https://academic.oup.com/bioinformatics/article-](https://academic.oup.com/bioinformatics/article-lookup/doi/10.1093/bioinformatics/btp348)  
1309 [lookup/doi/10.1093/bioinformatics/btp348](https://academic.oup.com/bioinformatics/article-lookup/doi/10.1093/bioinformatics/btp348)

- 1310 111. Kück P, Meusemann K. FASconCAT: Convenient handling of data matrices. Mol  
1311 Phylogenet Evol [Internet]. 2010 Sep [cited 2017 Aug 1];56(3):1115–8. Available  
1312 from: <http://linkinghub.elsevier.com/retrieve/pii/S1055790310001909>
- 1313 112. Nguyen L-T, Schmidt HA, von Haeseler A, Minh BQ. IQ-TREE: a fast and effective  
1314 stochastic algorithm for estimating maximum-likelihood phylogenies. Mol Biol Evol  
1315 [Internet]. 2015 Jan [cited 2018 Sep 11];32(1):268–74. Available from:  
1316 <http://www.ncbi.nlm.nih.gov/pubmed/25371430>
- 1317 113. Darriba D, Posada D, Kozlov AM, Stamatakis A, Morel B, Flouri T. ModelTest-NG:  
1318 A New and Scalable Tool for the Selection of DNA and Protein Evolutionary Models.  
1319 Mol Biol Evol [Internet]. 2020 Jan 1 [cited 2021 Aug 18];37(1):291–4. Available  
1320 from: <https://academic.oup.com/mbe/article/37/1/291/5552155>
- 1321 114. Tavaré S. Some probabilistic and statistical problems in the analysis of DNA  
1322 sequences. Lect Math life [Internet]. 1986 [cited 2021 Aug 18]; Available from:  
1323 [https://books.google.com/books?hl=en&lr=&id=8aI1phhOKhgC&oi=fnd&pg=PA57&](https://books.google.com/books?hl=en&lr=&id=8aI1phhOKhgC&oi=fnd&pg=PA57&ots=roMG4RHdKi&sig=csERmeVhWARIEZ2mHiyf3_zHGSA)  
1324 [ots=roMG4RHdKi&sig=csERmeVhWARIEZ2mHiyf3\\_zHGSA](https://books.google.com/books?hl=en&lr=&id=8aI1phhOKhgC&oi=fnd&pg=PA57&ots=roMG4RHdKi&sig=csERmeVhWARIEZ2mHiyf3_zHGSA)
- 1325 115. Lechner M, Findeiß S, Steiner L, Marz M, Stadler PF, Prohaska SJ. Proteinortho:  
1326 Detection of (Co-)orthologs in large-scale analysis. BMC Bioinformatics [Internet].  
1327 2011 Apr 28 [cited 2020 Jun 30];12(1):124. Available from:  
1328 <https://bmcbioinformatics.biomedcentral.com/articles/10.1186/1471-2105-12-124>
- 1329 116. Edgar RC. MUSCLE: multiple sequence alignment with high accuracy and high  
1330 throughput. Nucleic Acids Res [Internet]. 2004 Mar 8 [cited 2018 Sep 13];32(5):1792–  
1331 7. Available from: [https://academic.oup.com/nar/article-](https://academic.oup.com/nar/article-lookup/doi/10.1093/nar/gkh340)  
1332 [lookup/doi/10.1093/nar/gkh340](https://academic.oup.com/nar/article-lookup/doi/10.1093/nar/gkh340)
- 1333 117. Le SQ, Gascuel O. An Improved General Amino Acid Replacement Matrix. Mol Biol  
1334 Evol [Internet]. 2008 Apr 3 [cited 2018 Jan 5];25(7):1307–20. Available from:

- 1335 <http://www.ncbi.nlm.nih.gov/pubmed/18367465>
- 1336 118. Letunic I, Bork P. Interactive Tree Of Life (iTOL) v5: an online tool for phylogenetic  
1337 tree display and annotation. Nucleic Acids Res [Internet]. 2021 Jul 2 [cited 2021 Aug  
1338 27];49(W1):W293–6. Available from:  
1339 <https://academic.oup.com/nar/article/49/W1/W293/6246398>
- 1340 119. Cheng L, Connor T, Sirén J, Aanensen D, Corander J. Hierarchical and spatially  
1341 explicit clustering of DNA sequences with BAPS software. Mol Biol Evol [Internet].  
1342 2013 May [cited 2021 Aug 31];30(5):1224–8. Available from:  
1343 <https://pubmed.ncbi.nlm.nih.gov/23408797/>
- 1344 120. Tonkin-Hill G, Lees JA, Bentley SD, Frost SDW, Corander J. RhierBAPS: An R  
1345 implementation of the population clustering algorithm hierBAPS. Wellcome Open Res  
1346 [Internet]. 2018 [cited 2021 Aug 31];3. Available from: [/pmc/articles/PMC6178908/](https://www.ncbi.nlm.nih.gov/pmc/articles/PMC6178908/)
- 1347 121. Silva M, Machado MP, Silva DN, Rossi M, Moran-Gilad J, Santos S, et al.  
1348 chewBBACA: A complete suite for gene-by-gene schema creation and strain  
1349 identification. Microb Genomics [Internet]. 2018 Mar 1 [cited 2021 Aug 27];4(3).  
1350 Available from: [/pmc/articles/PMC5885018/](https://www.ncbi.nlm.nih.gov/pmc/articles/PMC5885018/)
- 1351 122. Zhou Z, Alikhan N-F, Sergeant MJ, Luhmann N, Vaz C, Francisco AP, et al.  
1352 GrapeTree: visualization of core genomic relationships among 100,000 bacterial  
1353 pathogens. Genome Res [Internet]. 2018 Sep 1 [cited 2021 Aug 27];28(9):1395–404.  
1354 Available from: <https://genome.cshlp.org/content/28/9/1395.full>
- 1355 123. Abudahab K, Prada JM, Yang Z, Bentley SD, Croucher NJ, Corander J, et al. PANINI:  
1356 Pangenome Neighbour Identification for Bacterial Populations. Microb Genomics  
1357 [Internet]. 2018 Nov 22 [cited 2021 Aug 31];5(4):e000220. Available from:  
1358 <https://www.microbiologyresearch.org/content/journal/mgen/10.1099/mgen.0.000220>
- 1359 124. Argimón S, Abudahab K, Goater RJE, Fedosejev A, Bhai J, Glasner C, et al.



- 1360 Microreact: visualizing and sharing data for genomic epidemiology and
- 1361 phylogeography. *Microb Genomics* [Internet]. 2016 Nov 30 [cited 2021 Sep
- 1362 1];2(11):e000093. Available from:
- 1363 <https://www.microbiologyresearch.org/content/journal/mgen/10.1099/mgen.0.000093>
- 1364 125. Croucher NJ, Page AJ, Connor TR, Delaney AJ, Keane JA, Bentley SD, et al. Rapid
- 1365 phylogenetic analysis of large samples of recombinant bacterial whole genome
- 1366 sequences using Gubbins. *Nucleic Acids Res* [Internet]. 2015 Feb 18 [cited 2021 Sep
- 1367 1];43(3):e15–e15. Available from:
- 1368 <https://academic.oup.com/nar/article/43/3/e15/2410982>
- 1369 126. Hadfield J, Croucher NJ, Goater RJ, Abudahab K, Aanensen DM, Harris SR.
- 1370 Phandango: an interactive viewer for bacterial population genomics. *Bioinformatics*
- 1371 [Internet]. 2018 Jan 15 [cited 2021 Sep 1];34(2):292–3. Available from:
- 1372 <https://academic.oup.com/bioinformatics/article/34/2/292/4212949>
- 1373 127. Starikova E V, Tikhonova PO, Prianichnikov NA, Rands CM, Zdobnov EM, Ilina EN,
- 1374 et al. Phigaro: high-throughput prophage sequence annotation. *Bioinformatics*
- 1375 [Internet]. 2020 Jun 1 [cited 2021 Aug 18];36(12):3882–4. Available from:
- 1376 <https://academic.oup.com/bioinformatics/article/36/12/3882/5822875>
- 1377 128. Cury J, Jové T, Touchon M, Néron B, Rocha EP. Identification and analysis of
- 1378 integrons and cassette arrays in bacterial genomes. *Nucleic Acids Res* [Internet]. 2016
- 1379 Jun 2 [cited 2021 Nov 22];44(10):4539–50. Available from:
- 1380 <https://pubmed.ncbi.nlm.nih.gov/27130947/>
- 1381 129. Singh K, Malathum K, Murray B. Disruption of an *Enterococcus faecium* species-
- 1382 specific gene, a homologue of acquired macrolide resistance genes of staphylococci, is
- 1383 associated with an increase in macrolide susceptibility. *Antimicrob Agents Chemother*
- 1384 [Internet]. 2001 [cited 2021 Aug 24];45(1):263–6. Available from:



- 1385 <https://pubmed.ncbi.nlm.nih.gov/11120975/>
- 1386 130. Costa Y, Galimand M, Leclercq R, Duval J, Courvalin P. Characterization of the
- 1387 chromosomal aac(6')-II gene specific for *Enterococcus faecium*. *Antimicrob Agents*
- 1388 *Chemother* [Internet]. 1993 [cited 2021 Aug 24];37(9):1896–903. Available from:
- 1389 <https://pubmed.ncbi.nlm.nih.gov/8239603/>
- 1390 131. Draker K, Northrop D, Wright G. Kinetic mechanism of the GCN5-related
- 1391 chromosomal aminoglycoside acetyltransferase AAC(6')-II from *Enterococcus*
- 1392 *faecium*: evidence of dimer subunit cooperativity. *Biochemistry* [Internet]. 2003 Jun 3
- 1393 [cited 2021 Aug 24];42(21):6565–74. Available from:
- 1394 <https://pubmed.ncbi.nlm.nih.gov/12767240/>
- 1395 132. Wybenga-Groot L, Draker K, Wright G, Berghuis A. Crystal structure of an
- 1396 aminoglycoside 6'-N-acetyltransferase: defining the GCN5-related N-acetyltransferase
- 1397 superfamily fold. *Structure* [Internet]. 1999 [cited 2021 Aug 24];7(5):497–507.
- 1398 Available from: <https://pubmed.ncbi.nlm.nih.gov/10378269/>
- 1399 133. Prieto AMG, Wijngaarden J, Braat JC, Rogers MRC, Majoor E, Brouwer EC, et al.
- 1400 The Two-Component System ChtRS Contributes to Chlorhexidine Tolerance in
- 1401 *Enterococcus faecium*. *Antimicrob Agents Chemother* [Internet]. 2017 May 1 [cited
- 1402 2021 Aug 24];61(5). Available from: [/pmc/articles/PMC5404517/](https://pubmed.ncbi.nlm.nih.gov/2744517/)
- 1403 134. Fujishima K, Kawada-Matsuo M, Oogai Y, Tokuda M, Torii M, Komatsuzawa H. dpr
- 1404 and sod in *Streptococcus mutans* Are Involved in Coexistence with *S. sanguinis*, and
- 1405 PerR Is Associated with Resistance to H<sub>2</sub>O<sub>2</sub>. *Appl Environ Microbiol* [Internet]. 2013
- 1406 Mar [cited 2021 Aug 24];79(5):1436. Available from: [/pmc/articles/PMC3591952/](https://pubmed.ncbi.nlm.nih.gov/23591952/)
- 1407 135. Yamamoto Y, Poole LB, Hantgan RR, Kamio Y. An iron-binding protein, Dpr, from
- 1408 *Streptococcus mutans* prevents iron-dependent hydroxyl radical formation in vitro. *J*
- 1409 *Bacteriol* [Internet]. 2002 [cited 2021 Aug 24];184(11):2931–9. Available from:

- 1410 <http://www.jphilo>
- 1411 136. Hasman H, Kempf I, Chidaine B, Cariolet R, Ersbøll AK, Houe H, et al. Copper  
1412 resistance in *Enterococcus faecium*, mediated by the *tcrB* gene, is selected by  
1413 supplementation of pig feed with copper sulfate. *Appl Environ Microbiol* [Internet].  
1414 2006 Sep [cited 2021 Aug 24];72(9):5784–9. Available from:  
1415 <https://journals.asm.org/journal/aem>
- 1416 137. Mazaheri Nezhad Fard R, Heuzenroeder MW, Barton MD. Antimicrobial and heavy  
1417 metal resistance in commensal enterococci isolated from pigs. *Vet Microbiol*. 2011  
1418 Mar 24;148(2–4):276–82.
- 1419 138. Horsburgh MJ, Clements MO, Crossley H, Ingham E, Foster SJ. PerR Controls  
1420 Oxidative Stress Resistance and Iron Storage Proteins and Is Required for Virulence in  
1421 *Staphylococcus aureus*. *Infect Immun* [Internet]. 2001 [cited 2021 Aug  
1422 24];69(6):3744. Available from: [/pmc/articles/PMC98383/](https://pubmed.ncbi.nlm.nih.gov/11544444/)
- 1423 139. Møller AK, Barkay T, Hansen MA, Norman A, Hansen LH, Sørensen SJ, et al.  
1424 Mercuric reductase genes (*merA*) and mercury resistance plasmids in High Arctic  
1425 snow, freshwater and sea-ice brine. *FEMS Microbiol Ecol* [Internet]. 2014 Jan 1 [cited  
1426 2021 Aug 24];87(1):52–63. Available from:  
1427 <https://academic.oup.com/femsec/article/87/1/52/508980>
- 1428 140. Zaheer R, Cook SR, Barbieri R, Goji N, Cameron A, Petkau A, et al. Surveillance of  
1429 *Enterococcus* spp. reveals distinct species and antimicrobial resistance diversity across  
1430 a One-Health continuum. *Sci Reports* 2020 101 [Internet]. 2020 Mar 3 [cited 2021  
1431 Aug 25];10(1):1–16. Available from: [https://www.nature.com/articles/s41598-020-](https://www.nature.com/articles/s41598-020-61002-5)  
1432 [61002-5](https://www.nature.com/articles/s41598-020-61002-5)
- 1433 141. Creti R, Koch S, Fabretti F, Baldassarri L, Huebner J. Enterococcal colonization of the  
1434 gastro-intestinal tract: role of biofilm and environmental oligosaccharides. *BMC*

- 1435 Microbiol [Internet]. 2006 Jul 11 [cited 2021 Aug 25];6:60. Available from:  
1436 /pmc/articles/PMC1534043/
- 1437 142. Nallapareddy SR, Singh K V., Sillanpää J, Garsin DA, Höök M, Erlandsen SL, et al.  
1438 Endocarditis and biofilm-associated pili of *Enterococcus faecalis*. J Clin Invest  
1439 [Internet]. 2006 Oct 2 [cited 2021 Aug 25];116(10):2799. Available from:  
1440 /pmc/articles/PMC1578622/
- 1441 143. Dahl A, Rasmussen R V., Bundgaard H, Hassager C, Bruun LE, Lauridsen TK, et al.  
1442 *Enterococcus faecalis* Infective Endocarditis. Circulation [Internet]. 2013 Apr 30 [cited  
1443 2021 Aug 17];127(17):1810–7. Available from:  
1444 <https://www.ahajournals.org/doi/abs/10.1161/circulationaha.112.001170>
- 1445 144. Matos RC, Lapaque N, Rigottier-Gois L, Debarbieux L, Meylheuc T, Gonzalez-Zorn  
1446 B, et al. *Enterococcus faecalis* Prophage Dynamics and Contributions to Pathogenic  
1447 Traits. PLoS Genet [Internet]. 2013 Jun [cited 2021 Aug 25];9(6). Available from:  
1448 /pmc/articles/PMC3675006/
- 1449 145. Mayer C, Vocadlo D, Mah M, Rupitz K, Stoll D, Warren R, et al. Characterization of a  
1450 beta-N-acetylhexosaminidase and a beta-N-acetylglucosaminidase/beta-glucosidase  
1451 from *Cellulomonas fimi*. FEBS J [Internet]. 2006 Jul [cited 2021 Sep  
1452 2];273(13):2929–41. Available from: <https://pubmed.ncbi.nlm.nih.gov/16762038/>
- 1453 146. Rivolta C, Soldo B, Lazarevic V, Joris B, Mauël C, Karamat D. A 35.7 kb DNA  
1454 fragment from the *Bacillus subtilis* chromosome containing a putative 12.3 kb operon  
1455 involved in hexuronate catabolism and a perfectly symmetrical hypothetical catabolite-  
1456 responsive element. Microbiology [Internet]. 1998 [cited 2021 Sep 2];144 ( Pt  
1457 4(4):877–84. Available from: <https://pubmed.ncbi.nlm.nih.gov/9579062/>
- 1458 147. Phillips M, Hederstedt L, Hasnain S, Rutberg L, Guest J. Nucleotide sequence  
1459 encoding the flavoprotein and iron-sulfur protein subunits of the *Bacillus subtilis* PY79

- 1460 succinate dehydrogenase complex. J Bacteriol [Internet]. 1987 [cited 2021 Sep
- 1461 2];169(2):864–73. Available from: <https://pubmed.ncbi.nlm.nih.gov/3027051/>
- 1462 148. Wipat A, Carter N, Brignell S, Guy B, Piper K, Sanders J, et al. The dnaB-pheA (256
- 1463 degrees-240 degrees) region of the Bacillus subtilis chromosome containing genes
- 1464 responsible for stress responses, the utilization of plant cell walls and primary
- 1465 metabolism. Microbiology [Internet]. 1996 [cited 2021 Sep 2];142 ( Pt 1(11):3067–78.
- 1466 Available from: <https://pubmed.ncbi.nlm.nih.gov/8969504/>
- 1467 149. Mekjian K, Bryan E, Beall B, Moran C. Regulation of hexuronate utilization in
- 1468 Bacillus subtilis. J Bacteriol [Internet]. 1999 [cited 2021 Sep 2];181(2):426–33.
- 1469 Available from: <https://pubmed.ncbi.nlm.nih.gov/9882655/>
- 1470 150. Setlow B, Cabrera-Hernandez A, Cabrera-Martinez R, Setlow P. Identification of aryl-
- 1471 phospho-beta-D-glucosidases in Bacillus subtilis. Arch Microbiol [Internet]. 2004 Jan
- 1472 [cited 2021 Sep 2];181(1):60–7. Available from:
- 1473 <https://pubmed.ncbi.nlm.nih.gov/14652714/>
- 1474 151. Sadaie Y, Nakadate H, Fukui R, Yee L, Asai K. Glucomannan utilization operon of
- 1475 Bacillus subtilis. FEMS Microbiol Lett [Internet]. 2008 Feb [cited 2021 Sep
- 1476 2];279(1):103–9. Available from: <https://pubmed.ncbi.nlm.nih.gov/18177310/>
- 1477 152. Wong M, Lin Y, Rosen B. The soft metal ion binding sites in the Staphylococcus
- 1478 aureus pI258 CadC Cd(II)/Pb(II)/Zn(II)-responsive repressor are formed between
- 1479 subunits of the homodimer. J Biol Chem [Internet]. 2002 Oct 25 [cited 2021 Sep
- 1480 2];277(43):40930–6. Available from: <https://pubmed.ncbi.nlm.nih.gov/12176999/>
- 1481 153. Msadek T, Kunst F, Rapoport G. MecB of Bacillus subtilis, a member of the ClpC
- 1482 ATPase family, is a pleiotropic regulator controlling competence gene expression and
- 1483 growth at high temperature. Proc Natl Acad Sci U S A [Internet]. 1994 Jun 1 [cited
- 1484 2021 Sep 2];91(13):5788–92. Available from:

- 1485 <https://europepmc.org/articles/PMC44082>
- 1486 154. Krüger E, Völker U, Hecker M. Stress induction of clpC in *Bacillus subtilis* and its  
1487 involvement in stress tolerance. *J Bacteriol* [Internet]. 1994 [cited 2021 Sep  
1488 2];176(11):3360–7. Available from: <https://pubmed.ncbi.nlm.nih.gov/8195092/>
- 1489 155. Leskelä S, Wahlström E, Kontinen V, Sarvas M. Lipid modification of prelipoproteins  
1490 is dispensable for growth but essential for efficient protein secretion in *Bacillus*  
1491 *subtilis*: characterization of the Lgt gene. *Mol Microbiol* [Internet]. 1999 [cited 2021  
1492 Sep 2];31(4):1075–85. Available from: <https://pubmed.ncbi.nlm.nih.gov/10096076/>
- 1493 156. Harvie D, Andreini C, Cavallaro G, Meng W, Connolly B, Yoshida K, et al. Predicting  
1494 metals sensed by ArsR-SmtB repressors: allosteric interference by a non-effector  
1495 metal. *Mol Microbiol* [Internet]. 2006 Feb [cited 2021 Sep 2];59(4):1341–56.  
1496 Available from: <https://pubmed.ncbi.nlm.nih.gov/16430705/>
- 1497 157. Nicolaou S, Fast A, Nakamaru-Ogiso E, Papoutsakis E. Overexpression of fetA (ybbL)  
1498 and fetB (ybbM), Encoding an Iron Exporter, Enhances Resistance to Oxidative Stress  
1499 in *Escherichia coli*. *Appl Environ Microbiol* [Internet]. 2013 Dec [cited 2021 Sep  
1500 2];79(23):7210–9. Available from: <https://pubmed.ncbi.nlm.nih.gov/24038693/>
- 1501 158. Zheng R, Blanchard J. Kinetic and mechanistic analysis of the *E. coli* panE-encoded  
1502 ketopantoate reductase. *Biochemistry* [Internet]. 2000 Apr 4 [cited 2021 Sep  
1503 2];39(13):3708–17. Available from: <https://pubmed.ncbi.nlm.nih.gov/10736170/>
- 1504 159. Fraser K, Harvie D, Coote P, O’Byrne C. Identification and characterization of an ATP  
1505 binding cassette L-carnitine transporter in *Listeria monocytogenes*. *Appl Environ*  
1506 *Microbiol* [Internet]. 2000 [cited 2021 Sep 2];66(11):4696–704. Available from:  
1507 <https://pubmed.ncbi.nlm.nih.gov/11055912/>
- 1508 160. Huynh T, Choi P, Sureka K, Ledvina H, Campillo J, Tong L, et al. Cyclic di-AMP  
1509 targets the cystathionine beta-synthase domain of the osmolyte transporter OpuC. *Mol*

- 1510 Microbiol [Internet]. 2016 Oct 1 [cited 2021 Sep 2];102(2):233–43. Available from:  
1511 <https://pubmed.ncbi.nlm.nih.gov/27378384/>
- 1512 161. Pruteanu M, Baker T. Controlled degradation by ClpXP protease tunes the levels of  
1513 the excision repair protein UvrA to the extent of DNA damage. Mol Microbiol  
1514 [Internet]. 2009 Feb [cited 2021 Sep 2];71(4):912–24. Available from:  
1515 <https://pubmed.ncbi.nlm.nih.gov/19183285/>
- 1516 162. Myles G, Sancar A. Isolation and characterization of functional domains of UvrA.  
1517 Biochemistry [Internet]. 1991 Apr 1 [cited 2021 Sep 2];30(16):3834–40. Available  
1518 from: <https://pubmed.ncbi.nlm.nih.gov/1826851/>
- 1519 163. Cooper R. The utilisation of D-galactonate and D-2-oxo-3-deoxygalactonate by  
1520 Escherichia coli K-12. Biochemical and genetical studies. Arch Microbiol [Internet].  
1521 1978 Aug [cited 2021 Sep 2];118(2):199–206. Available from:  
1522 <https://pubmed.ncbi.nlm.nih.gov/211976/>
- 1523 164. LowKam C, Liotard B, Sygusch J. Structure of a class I tagatose-1,6-bisphosphate  
1524 aldolase: investigation into an apparent loss of stereospecificity. J Biol Chem  
1525 [Internet]. 2010 Jul 2 [cited 2021 Sep 2];285(27):21143–52. Available from:  
1526 <https://pubmed.ncbi.nlm.nih.gov/20427286/>
- 1527 165. Erni B, Zanolari B, Kocher H. The mannose permease of Escherichia coli consists of  
1528 three different proteins. Amino acid sequence and function in sugar transport, sugar  
1529 phosphorylation, and penetration of phage lambda DNA. J Biol Chem [Internet]. 1987  
1530 Apr 1 [cited 2021 Sep 2];262(11):5238–47. Available from:  
1531 <https://europepmc.org/article/MED/2951378>
- 1532 166. Stolz B, Huber M, Marković-Housley Z, Erni B. The mannose transporter of  
1533 Escherichia coli. Structure and function of the IIABMan subunit. J Biol Chem  
1534 [Internet]. 1993 Dec 1 [cited 2021 Sep 2];268(36):27094–9. Available from:

- 1535 <https://europepmc.org/article/MED/8262947>
- 1536 167. Newton G, Koledin T, Gorovitz B, Rawat M, Fahey R, Av-Gay Y. The
- 1537 glycosyltransferase gene encoding the enzyme catalyzing the first step of mycothiol
- 1538 biosynthesis (mshA). J Bacteriol [Internet]. 2003 Jun [cited 2021 Sep
- 1539 2];185(11):3476–9. Available from: <https://pubmed.ncbi.nlm.nih.gov/12754249/>
- 1540 168. Schöck F, Dahl M. Analysis of DNA flanking the treA gene of Bacillus subtilis reveals
- 1541 genes encoding a putative specific enzyme IITre and a potential regulator of the
- 1542 trehalose operon. Gene [Internet]. 1996 Oct 1 [cited 2021 Sep 2];175(1–2):59–63.
- 1543 Available from: <https://europepmc.org/article/MED/8917076>
- 1544 169. Kearns D, Chu F, Branda S, Kolter R, Losick R. A master regulator for biofilm
- 1545 formation by Bacillus subtilis. Mol Microbiol [Internet]. 2005 Feb 1 [cited 2021 Sep
- 1546 2];55(3):739–49. Available from: <https://europepmc.org/article/MED/15661000>
- 1547 170. Nogueira I, Nogueira T, Soares S, de Lencastre H. The Bacillus subtilis L-arabinose
- 1548 (ara) operon: nucleotide sequence, genetic organization and expression. Microbiology
- 1549 [Internet]. 1997 [cited 2021 Sep 2];143 ( Pt 3(3):957–69. Available from:
- 1550 <https://pubmed.ncbi.nlm.nih.gov/9084180/>
- 1551 171. Sirko A, Hryniewicz M, Hulanicka D, Böck A. Sulfate and thiosulfate transport in
- 1552 Escherichia coli K-12: nucleotide sequence and expression of the cysTWAM gene
- 1553 cluster. J Bacteriol [Internet]. 1990 [cited 2021 Sep 2];172(6):3351–7. Available from:
- 1554 <https://pubmed.ncbi.nlm.nih.gov/2188958/>
- 1555 172. Chowdhury N, Norris J, McAlister E, Lau S, Thomas G, Boyd E. The VC1777-
- 1556 VC1779 proteins are members of a sialic acid-specific subfamily of TRAP transporters
- 1557 (SiaPQM) and constitute the sole route of sialic acid uptake in the human pathogen
- 1558 Vibrio cholerae. Microbiology [Internet]. 2012 May 3 [cited 2021 Sep 2];158(Pt
- 1559 8):2158–67. Available from: <https://europepmc.org/article/MED/22556361>



173. Mathiopoulos C, Mueller J, Slack F, Murphy C, Patankar S, Bukusoglu G, et al. A *Bacillus subtilis* dipeptide transport system expressed early during sporulation. *Mol Microbiol* [Internet]. 1991 Aug 1 [cited 2021 Sep 2];5(8):1903–13. Available from: <https://europepmc.org/article/MED/1766370>
174. Perego M, Higgins C, Pearce S, Gallagher M, Hoch J. The oligopeptide transport system of *Bacillus subtilis* plays a role in the initiation of sporulation. *Mol Microbiol* [Internet]. 1991 [cited 2021 Sep 2];5(1):173–85. Available from: <https://pubmed.ncbi.nlm.nih.gov/1901616/>
175. Koide A, Hoch JA. Identification of a second oligopeptide transport system in *Bacillus subtilis* and determination of its role in sporulation. *Mol Microbiol*. 1994;13(3):417–26.
176. Parra-Lopez C, Baer MT, Groisman EA. Molecular genetic analysis of a locus required for resistance to antimicrobial peptides in *Salmonella typhimurium*. *EMBO J* [Internet]. 1993 Nov 1 [cited 2020 May 18];12(11):4053–62. Available from: <http://doi.wiley.com/10.1002/j.1460-2075.1993.tb06089.x>
177. Breazeale SD, Ribeiro AA, Raetz CRH. Origin of Lipid A Species Modified with 4-Amino-4-deoxy-l-arabinose in Polymyxin-resistant Mutants of *Escherichia coli*: AN AMINOTRANSFERASE (ArnB) THAT GENERATES UDP-4-AMINO-4-DEOXY-l-ARABINOSE. *J Biol Chem*. 2003 Jul 4;278(27):24731–9.
178. Yan A, Guan Z, Raetz CRH. An Undecaprenyl Phosphate-Aminoarabinose Flippase Required for Polymyxin Resistance in *Escherichia coli*. *J Biol Chem*. 2007 Dec 7;282(49):36077–89.
179. Liu YY, Wang Y, Walsh TR, Yi LX, Zhang R, Spencer J, et al. Emergence of plasmid-mediated colistin resistance mechanism MCR-1 in animals and human beings in China: A microbiological and molecular biological study. *Lancet Infect Dis*. 2016



- 1585 Feb 1;16(2):161–8.
- 1586 180. Alonso A, Sanchez P, Martínez JL. *Stenotrophomonas maltophilia* D457R Contains a
- 1587 Cluster of Genes from Gram-Positive Bacteria Involved in Antibiotic and Heavy
- 1588 Metal Resistance. *Antimicrob Agents Chemother* [Internet]. 2000 Jul [cited 2021 Nov
- 1589 9];44(7):1778. Available from: [/pmc/articles/PMC89961/](#)
- 1590 181. Humphrey S, Fillol-Salom A, Quiles-Puchalt N, Ibarra-Chávez R, Haag AF, Chen J, et
- 1591 al. Bacterial chromosomal mobility via lateral transduction exceeds that of classical
- 1592 mobile genetic elements. *Nat Commun* 2021 121 [Internet]. 2021 Nov 8 [cited 2021
- 1593 Nov 9];12(1):1–13. Available from: [https://www.nature.com/articles/s41467-021-](https://www.nature.com/articles/s41467-021-26004-5)
- 1594 [26004-5](https://www.nature.com/articles/s41467-021-26004-5)
- 1595 182. Chiang YN, Penadés JR, Chen J. Genetic transduction by phages and chromosomal
- 1596 islands: The new and noncanonical. *PLoS Pathog* [Internet]. 2019 [cited 2021 Nov
- 1597 9];15(8). Available from: [/pmc/articles/PMC6687093/](#)
- 1598 183. Royal College of Physicians I, Health Service Executive I. Guidelines for the
- 1599 Prevention and Control of MDRO excluding MRSA in the healthcare setting. 2012;
- 1600 184. Wein T, Wang Y, Barz M, Stücker FT, Hammerschmidt K, Dagan T. Essential gene
- 1601 acquisition destabilizes plasmid inheritance. *PLOS Genet* [Internet]. 2021 Jul 12 [cited
- 1602 2021 Aug 19];17(7):e1009656. Available from:
- 1603 <https://journals.plos.org/plosgenetics/article?id=10.1371/journal.pgen.1009656>
- 1604 185. Alice AF, López CS, Crosa JH. Plasmid- and Chromosome-Encoded Redundant and
- 1605 Specific Functions Are Involved in Biosynthesis of the Siderophore Anguibactin in
- 1606 *Vibrio anguillarum* 775: a Case of Chance and Necessity? *J Bacteriol* [Internet]. 2005
- 1607 Mar [cited 2021 Aug 19];187(6):2209. Available from: [/pmc/articles/PMC1064064/](#)
- 1608 186. Zheng J, Guan Z, Cao S, Peng D, Ruan L, Jiang D, et al. Plasmids are vectors for
- 1609 redundant chromosomal genes in the *Bacillus cereus* group. *BMC Genomics* 2015 161

- 1610 [Internet]. 2015 Jan 22 [cited 2021 Aug 19];16(1):1–10. Available from:  
1611 <https://bmcmgenomics.biomedcentral.com/articles/10.1186/s12864-014-1206-5>
- 1612 187. Baker-Austin C, Wright MS, Stepanauskas R, McArthur J V. Co-selection of antibiotic  
1613 and metal resistance. *Trends Microbiol.* 2006 Apr;14(4):176–82.
- 1614 188. Pal C, Asiani K, Arya S, Rensing C, Stekel D, Larsson D, et al. Metal Resistance and  
1615 Its Association With Antibiotic Resistance. *Adv Microb Physiol* [Internet]. 2017 Jan 1  
1616 [cited 2021 Aug 18];70:261–313. Available from:  
1617 <https://pubmed.ncbi.nlm.nih.gov/28528649/>
- 1618 189. Bae T, Baba T, Hiramatsu K, Schneewind O. Prophages of *Staphylococcus aureus*  
1619 Newman and their contribution to virulence. *Mol Microbiol.* 2006 Nov;62(4):1035–47.
- 1620 190. Xia G, Wolz C. Phages of *Staphylococcus aureus* and their impact on host evolution.  
1621 *Infect Genet Evol.* 2014 Jan 1;21:593–601.
- 1622 191. Pasek S, Risler J-L, Brezellec P. Gene fusion/fission is a major contributor to  
1623 evolution of multi-domain bacterial proteins. *Bioinformatics.* 2006 Jun;22(12):1418–  
1624 23.
- 1625 192. Des Marais DL, Rausher MD. Escape from adaptive conflict after duplication in an  
1626 anthocyanin pathway gene. *Nature* [Internet]. 2008 Aug 7 [cited 2019 Feb  
1627 11];454(7205):762–5. Available from:  
1628 <http://www.ncbi.nlm.nih.gov/pubmed/18594508>
- 1629 193. Rastogi S, Liberles DA. Subfunctionalization of duplicated genes as a transition state  
1630 to neofunctionalization. *BMC Evol Biol* [Internet]. 2005 Apr [cited 2019 Feb  
1631 19];5(1):28. Available from:  
1632 <http://bmcevolbiol.biomedcentral.com/articles/10.1186/1471-2148-5-28>
- 1633 194. Leonard G, Richards TA. Genome-scale comparative analysis of gene fusions, gene  
1634 fissions, and the fungal tree of life. *Proc Natl Acad Sci* [Internet]. 2012 Dec 26 [cited

1635 2017 Mar 7];109(52):21402–7. Available from:  
1636 <http://www.ncbi.nlm.nih.gov/pubmed/23236161>

1637 195. Conant GC, Birchler JA, Pires JC. Dosage, duplication, and diploidization: clarifying  
1638 the interplay of multiple models for duplicate gene evolution over time. *Curr Opin*  
1639 *Plant Biol.* 2014 Jun;19:91–8.

1640 196. Wang W, Yu H, Long M. Duplication-degeneration as a mechanism of gene fission  
1641 and the origin of new genes in *Drosophila* species. *Nat Genet* [Internet]. 2004 May 4  
1642 [cited 2017 Jul 18];36(5):523–7. Available from:  
1643 <http://www.nature.com/doifinder/10.1038/ng1338>

1644 197. Snel B, Bork P, Huynen M. Genome evolution. Gene fusion versus gene fission.  
1645 *Trends Genet* [Internet]. 2000 Jan [cited 2017 Jul 18];16(1):9–11. Available from:  
1646 <http://www.ncbi.nlm.nih.gov/pubmed/10637623>

1647 198. De Been M, Van Schaik W, Cheng L, Corander J, Willems RJ. Recent recombination  
1648 events in the core genome are associated with adaptive evolution in *Enterococcus*  
1649 *faecium*. *Genome Biol Evol* [Internet]. 2013 Aug 1 [cited 2021 Nov 12];5(8):1524–35.  
1650 Available from: <https://pubmed.ncbi.nlm.nih.gov/23882129/>

1651 199. Leavis HL, Willems RJL, Van Wamel WJB, Schuren FH, Caspers MPM, Bonten  
1652 MJM. Insertion sequence-driven diversification creates a globally dispersed emerging  
1653 multiresistant subspecies of *E. faecium*. *PLoS Pathog.* 2007 Jan;3(1):0075–96.

1654 200. Arenas M, Araujo NM, Branco C, Castelhana N, Castro-Nallar E, Pérez-Losada M.  
1655 Mutation and recombination in pathogen evolution: Relevance, methods and  
1656 controversies. *Infect Genet Evol* [Internet]. 2018 Sep 1 [cited 2021 Nov 12];63:295–  
1657 306. Available from: <https://pubmed.ncbi.nlm.nih.gov/28951202/>

1658

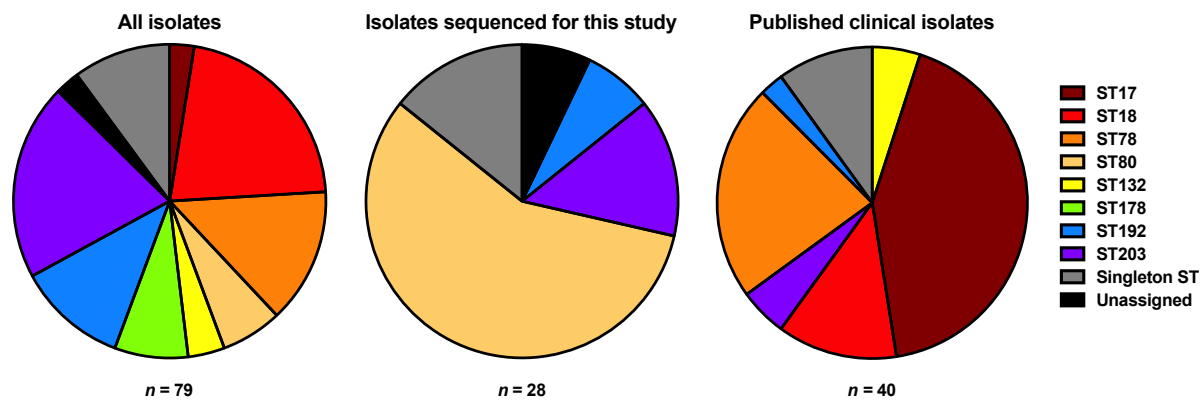

**Figure 1:** Distribution of sequence types between different studies

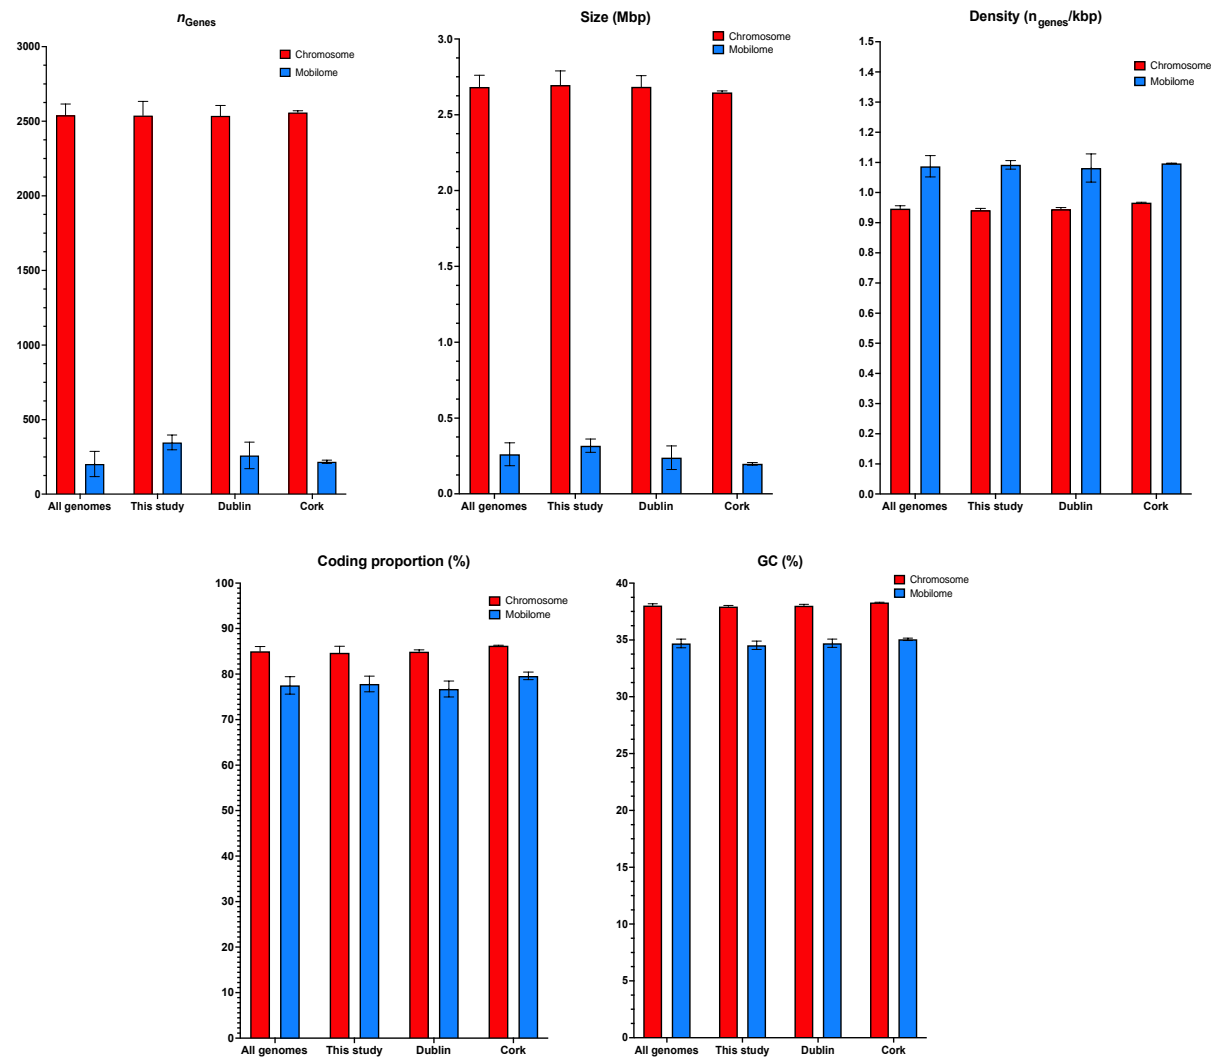

**Figure 2:** Comparison of different genome characteristics between chromosomes and plasmids across different studies.

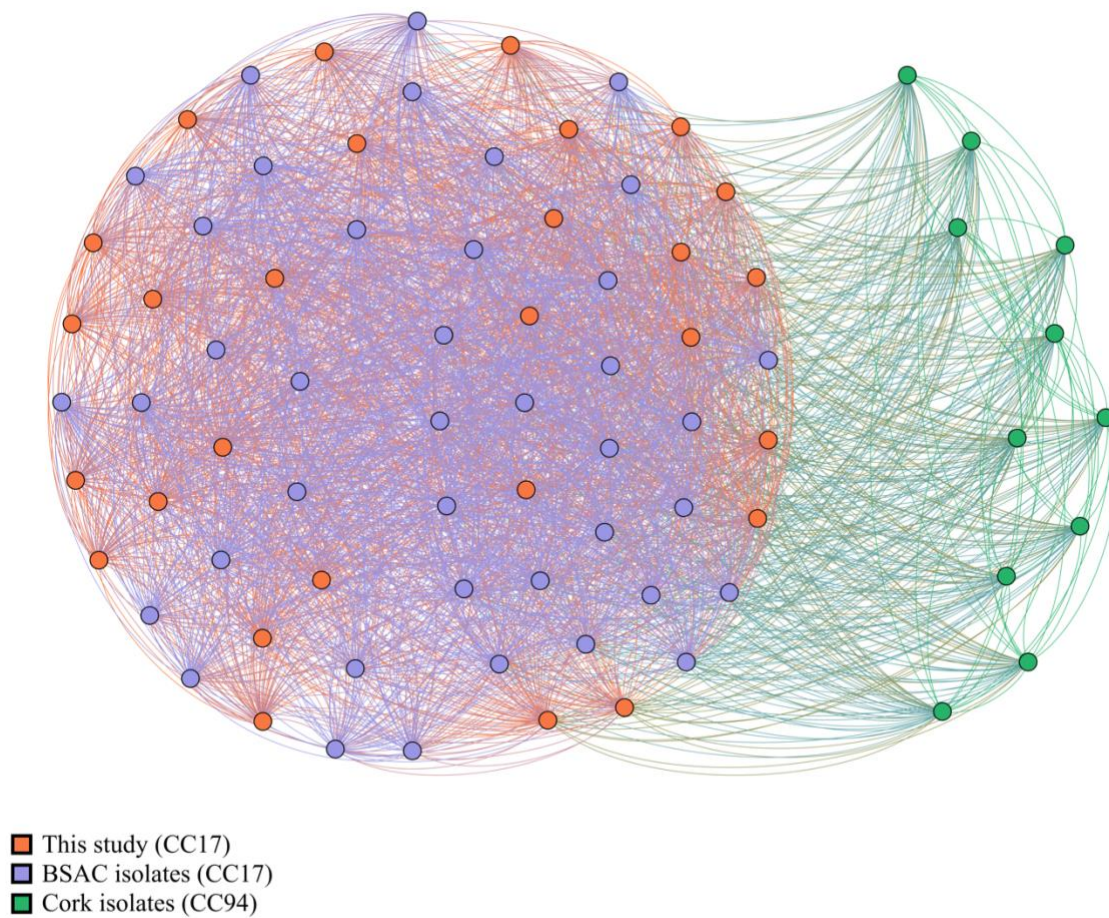

**Figure 3:** Genomic distance cluster analysis of chromosomal sequences from all isolates. All CC17 isolates cluster together and all CC94 isolates cluster together (whereby all isolates share an edge). Approximately half of CC17 cluster with CC94.



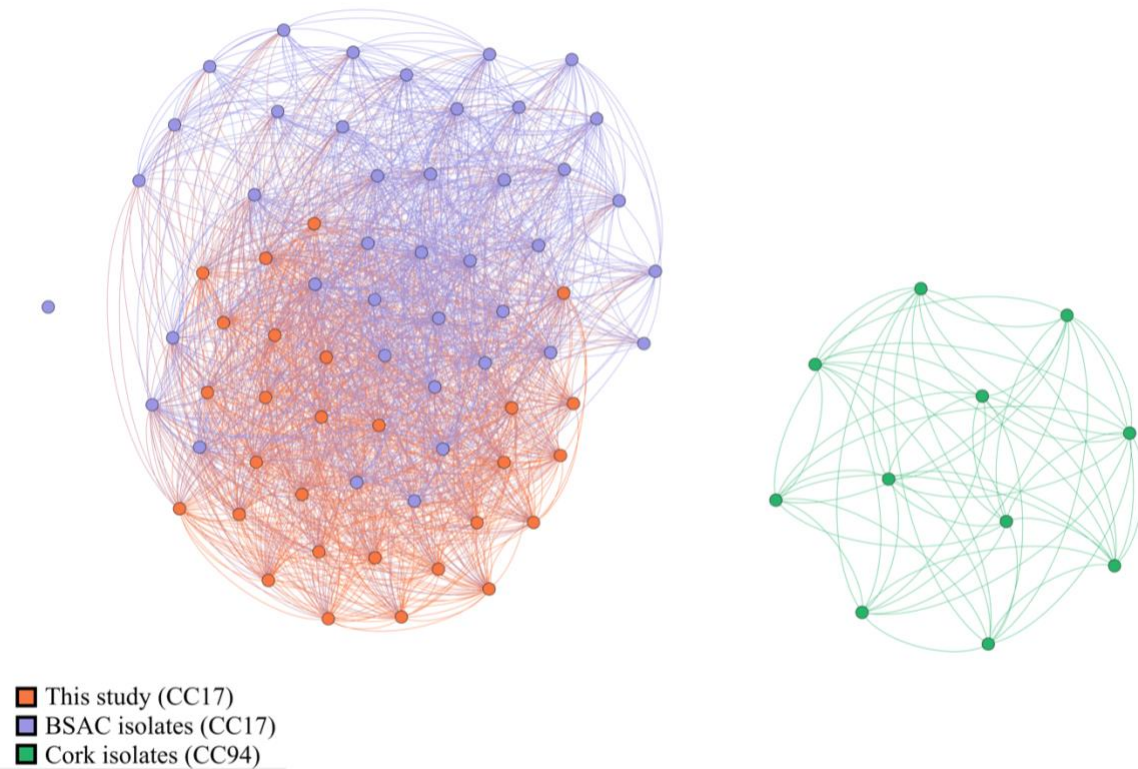

**Figure 4:** Genomic distance cluster analysis of mobilomal sequences from all isolates. While some mixing occurs with BSAC isolates and isolates sequenced for this study, divergence between communities is observed. One BSAC isolate (ERR374724) is completely disconnected from the other connected components, which is unusual due to the shared presence of a *vanA*+ genotype between ERR374724 and many other isolates. All CC94 isolates cluster together in a separate connected component from CC17 mobilomes.







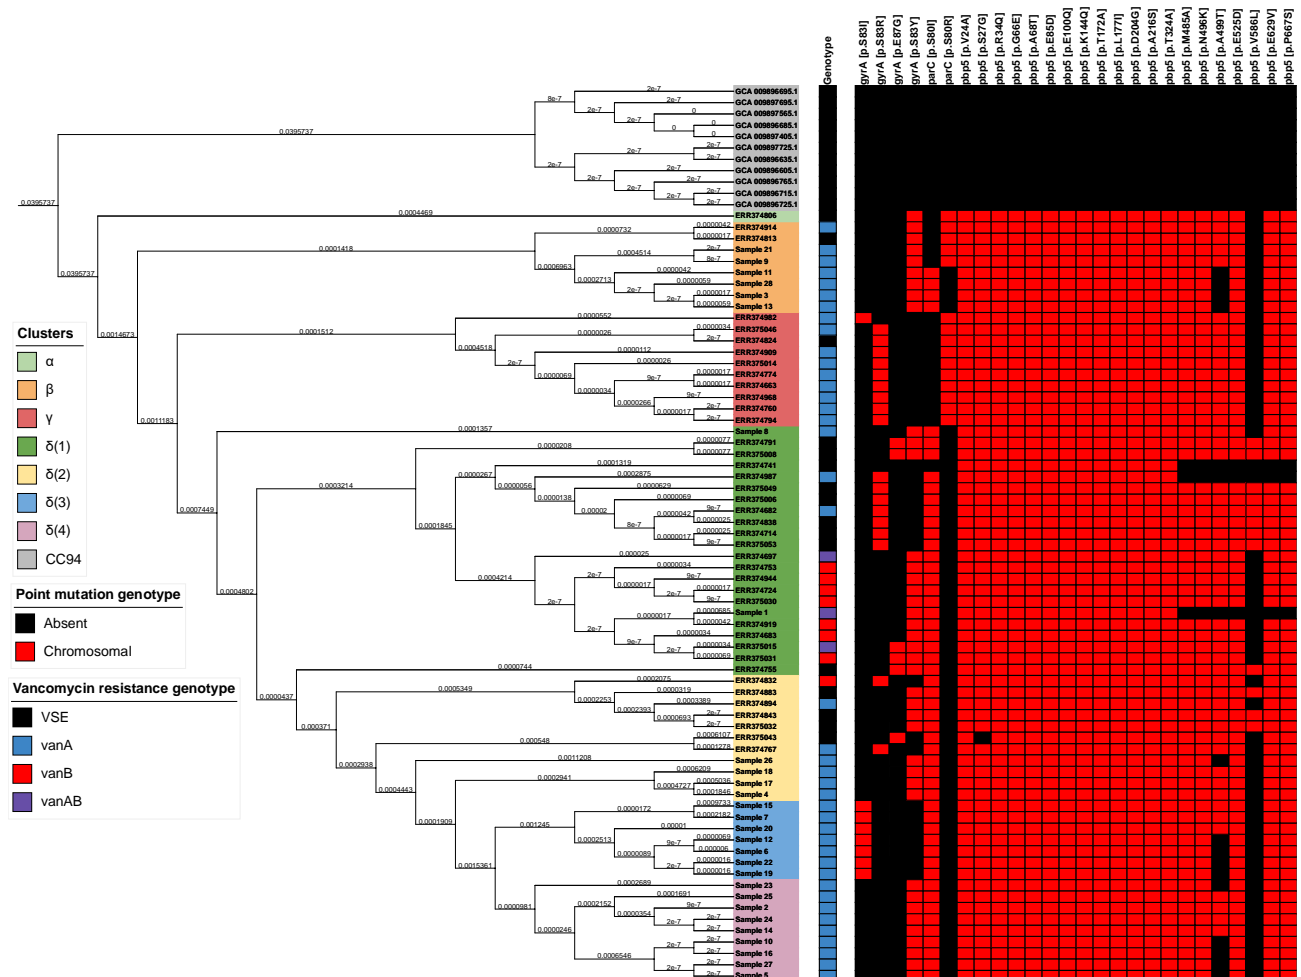

**Figure 7.** A phylogeny of isolates illustrating point mutation mediated drug resistance genotype distributions as a categorical heatmap. Again, taxa are shaded based on their associated RhesusBAPS cluster and a vancomycin resistance genotype is given as a separate bar for each taxon.

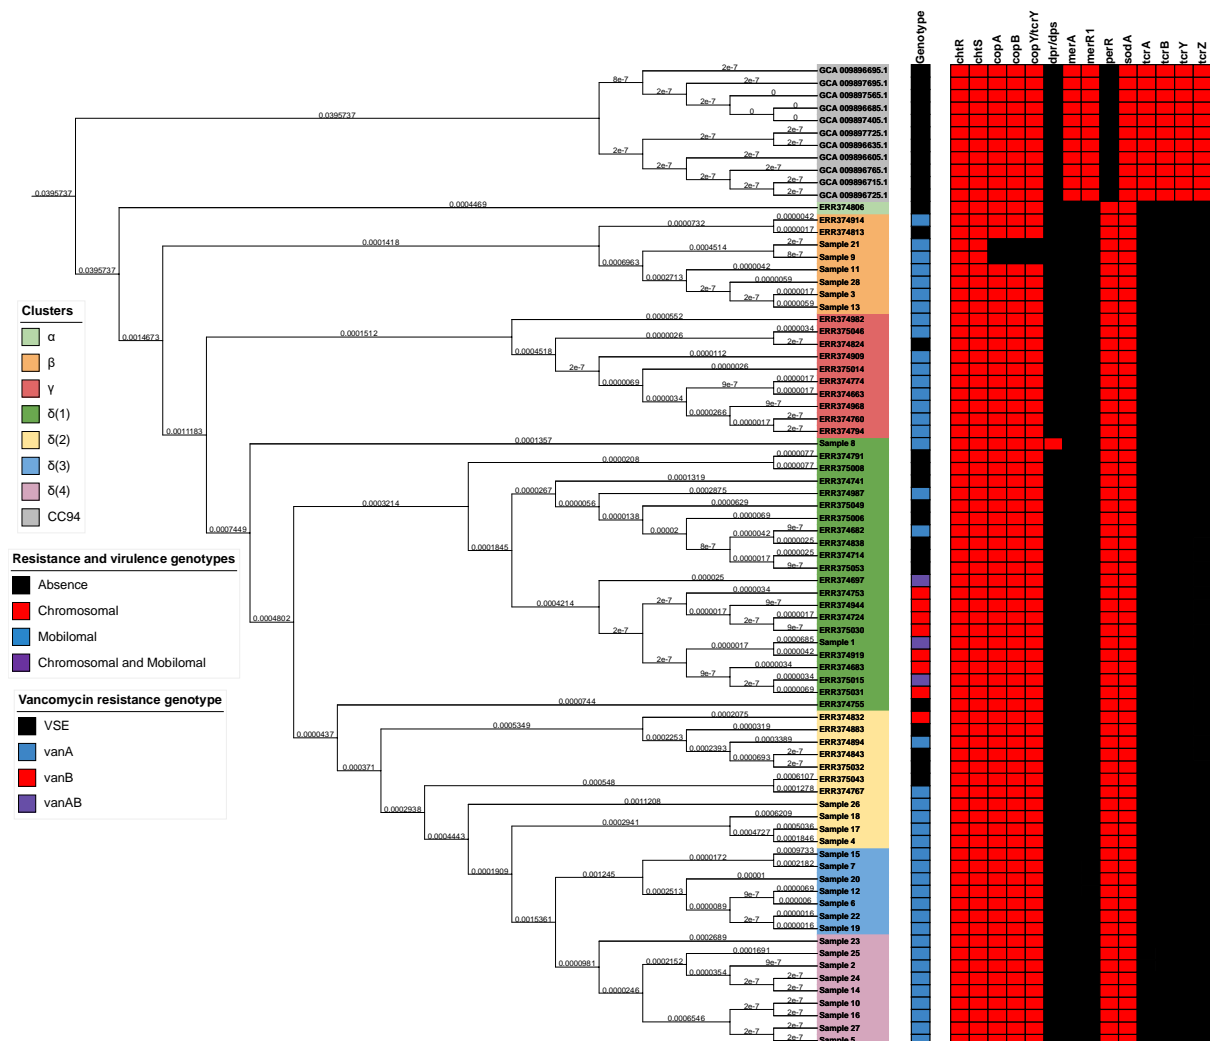

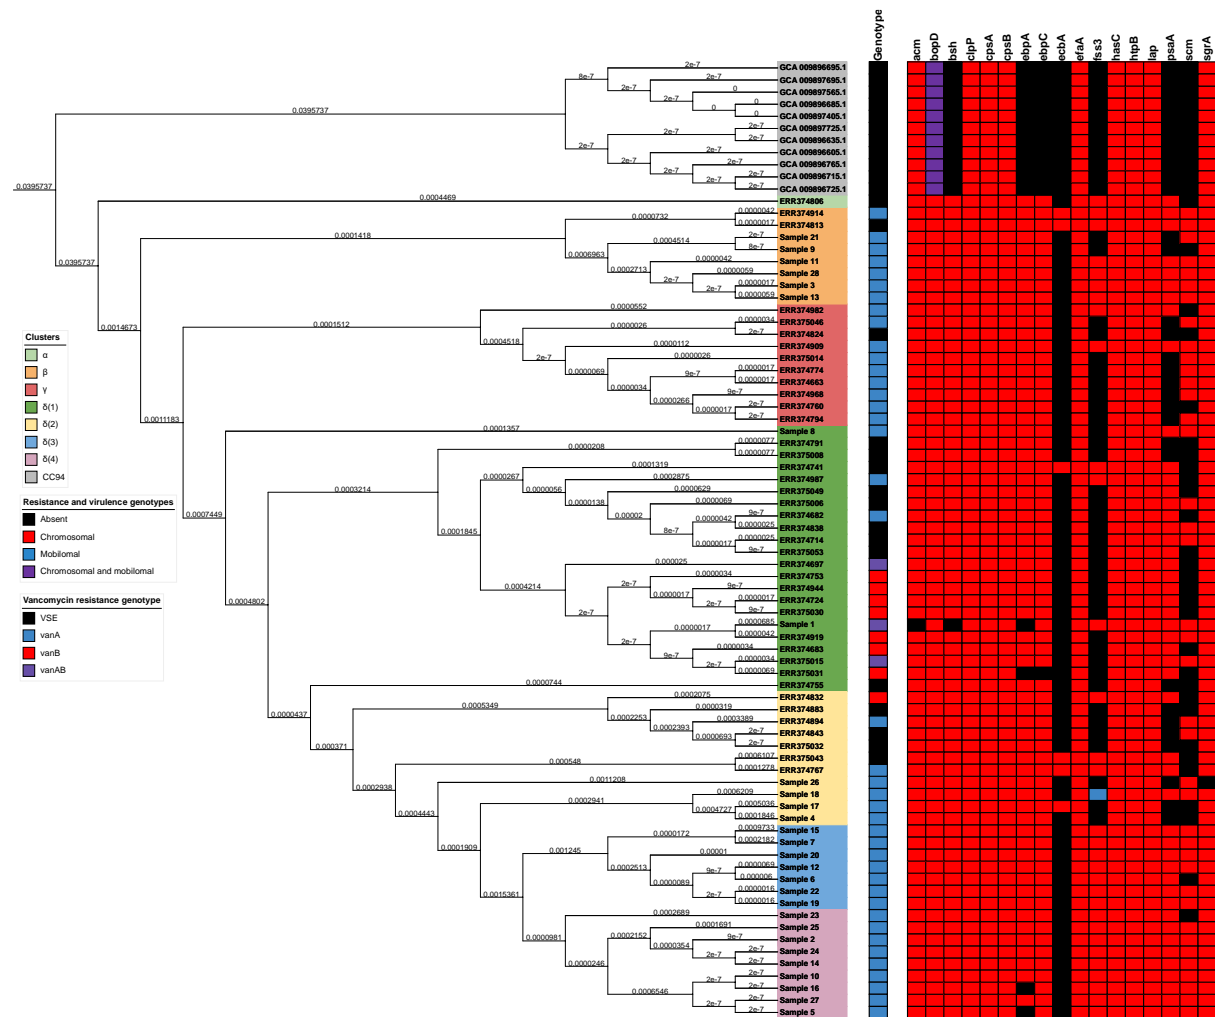

**Figure 9.** A phylogeny of isolates illustrating virulence factor genotype distributions as a categorical heatmap. Again, taxa are shaded based on their associated RheirBAPS cluster and a vancomycin resistance genotype is given as a separate bar for each taxon.

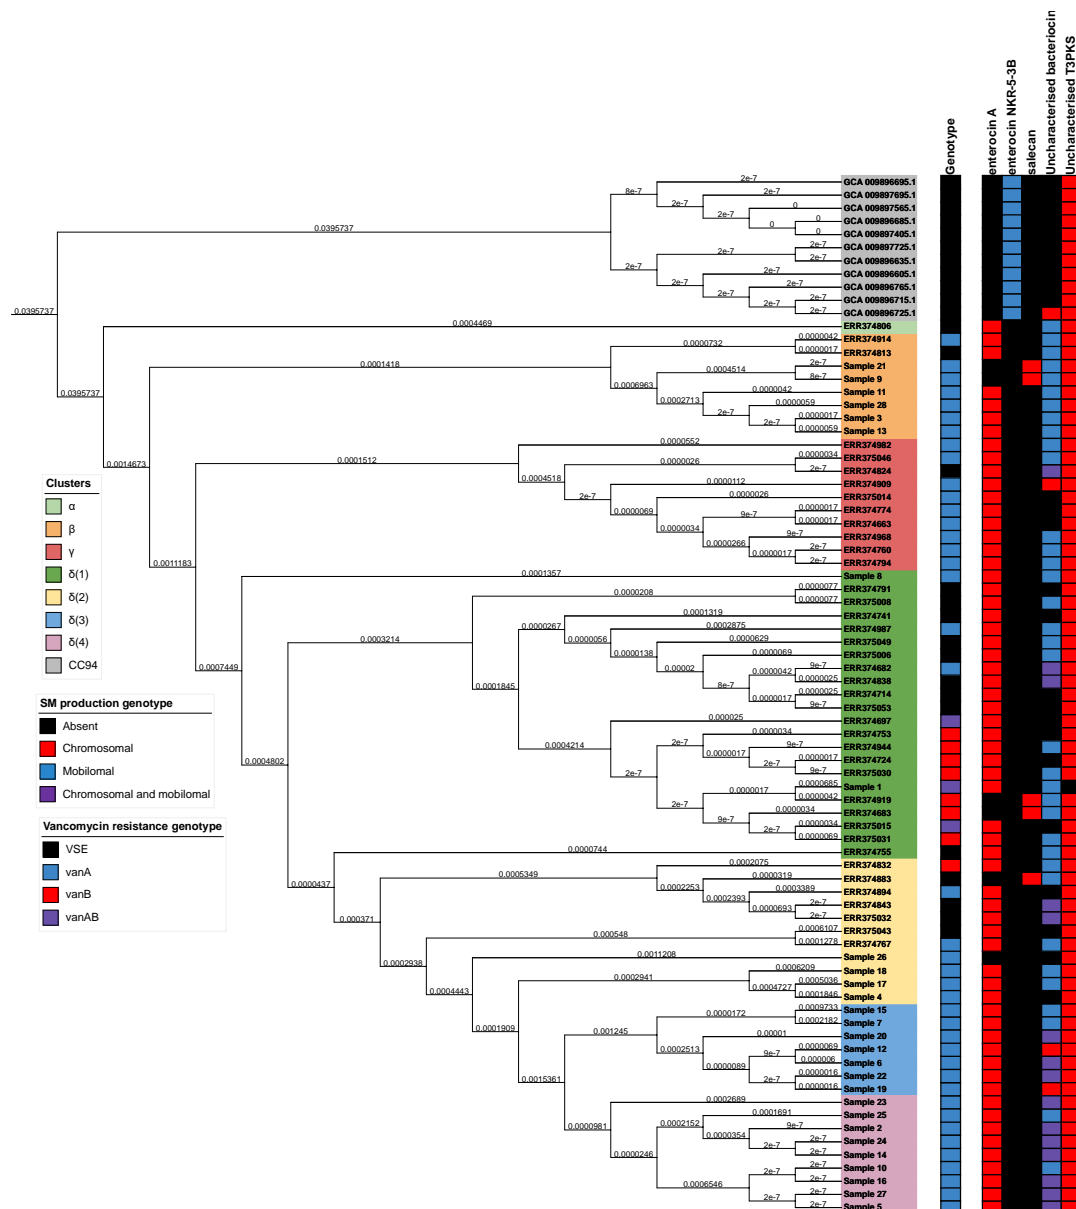

**Figure 10.** A phylogeny of isolates illustrating secondary metabolite production genotype distributions as a categorical heatmap. Again, taxa are shaded based on their associated RheirBAPS cluster and a vancomycin resistance genotype is given as a separate bar for each taxon.

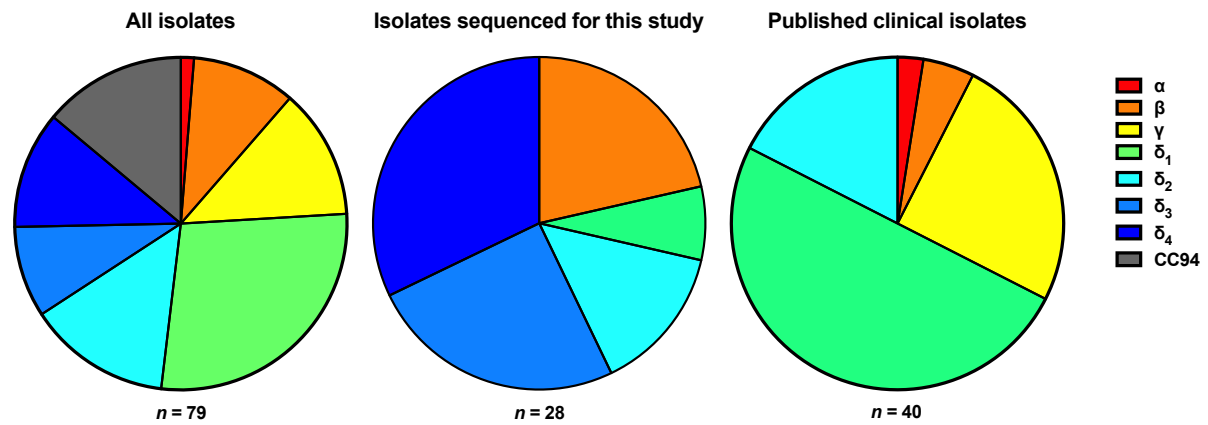

**Figure 11:** Distribution of RheirBAPS clusters between studies

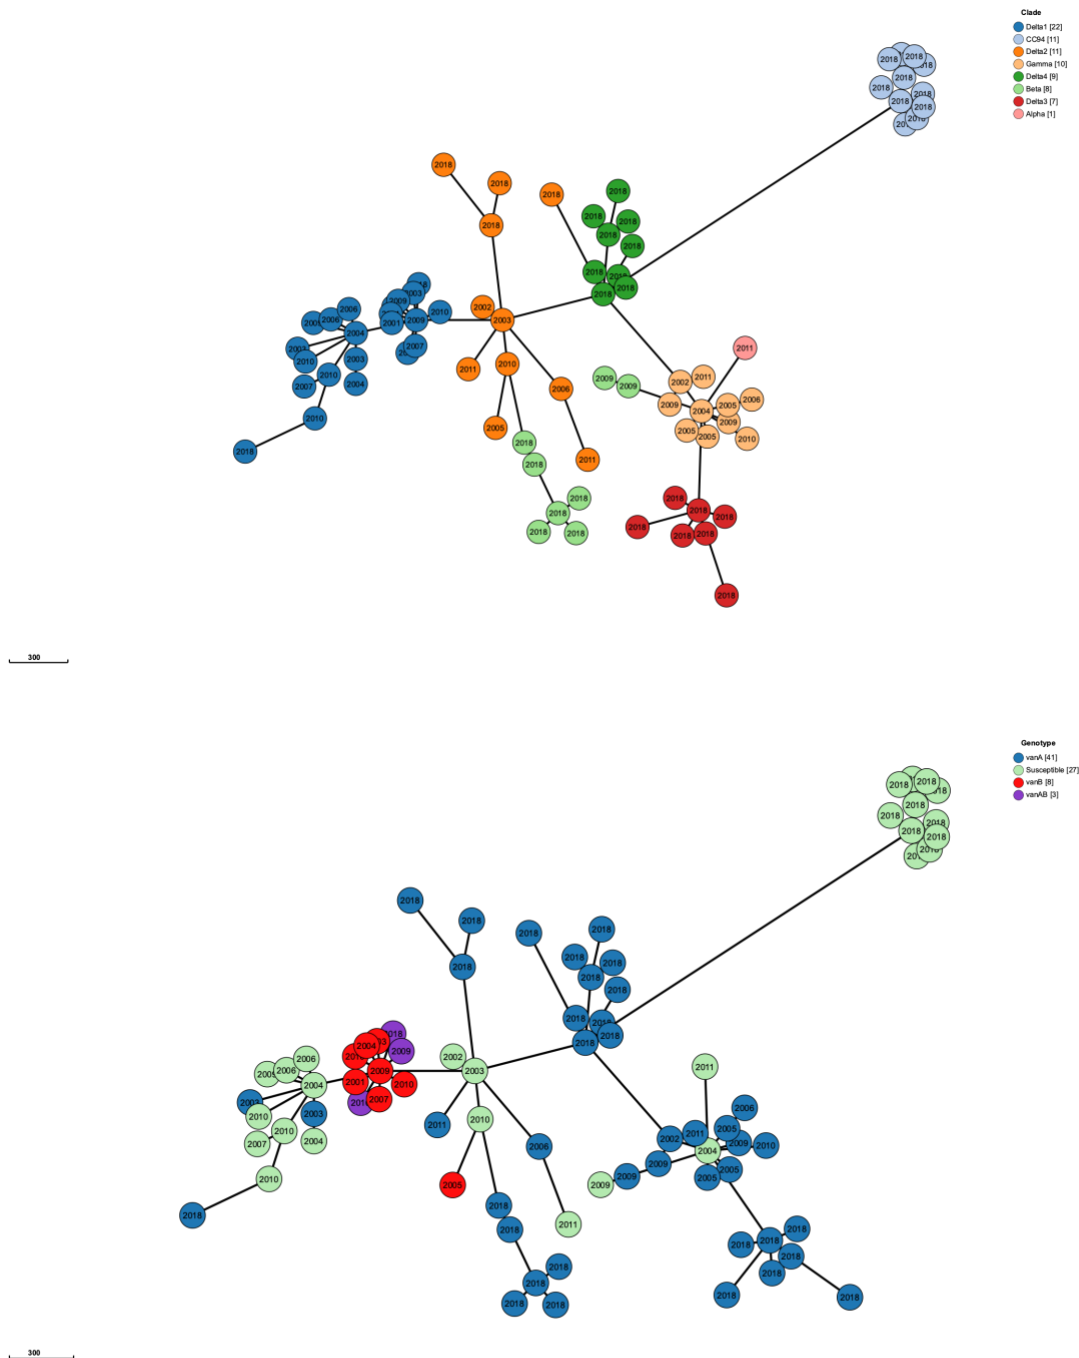

**Figure 12:** Core genome MLST (cgMLST) for all isolates included in this study. The upper image is shaded based on RheirBAPS clustering and the lower is shaded based on vancomycin resistance genotypes. The year of isolation is presented in the centre of each circle, where each circle represents an isolate.

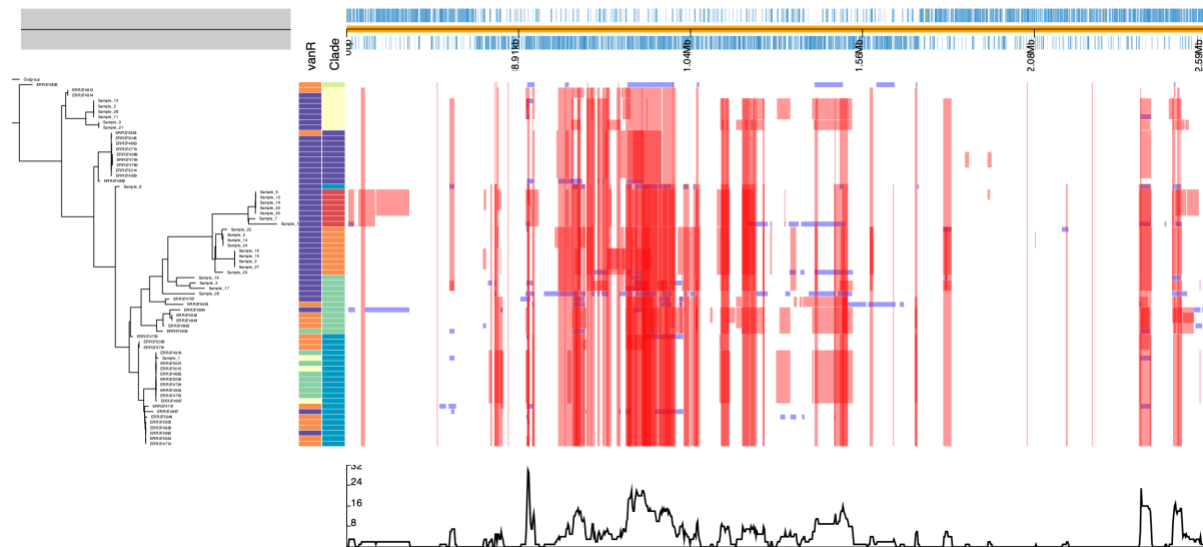

**Figure 13:** Red bars illustrate hot spots compared to a reference, where a hotspot is defined as a site where more than one species reports a  $\geq 50\%$  likelihood for the same recombination event. Blue boxes illustrate a recombination event for a single species. Multiple different recombination events can occur at the same site (appearing as overlap in this image). The plot at the bottom shows the maximal amount of species affected by a detected recombination event in a given hotspot



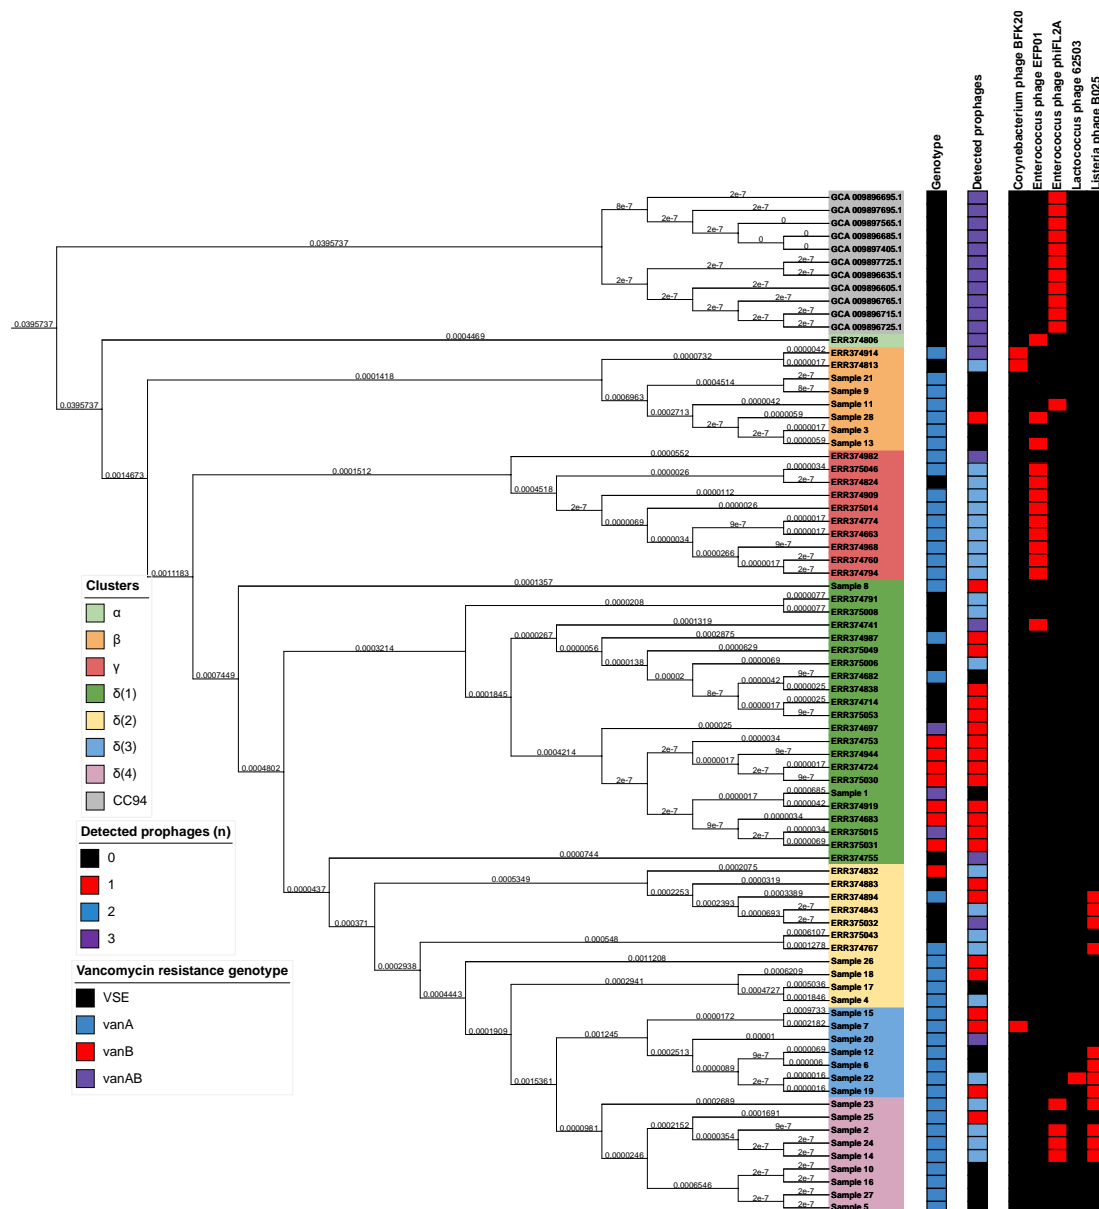

**Figure 14.** A phylogeny of isolates illustrating detected prophage distributions as a categorical heatmap. Again, taxa are shaded based on their associated RheirBAPS cluster and a vancomycin resistance genotype is given as a separate bar for each taxon.

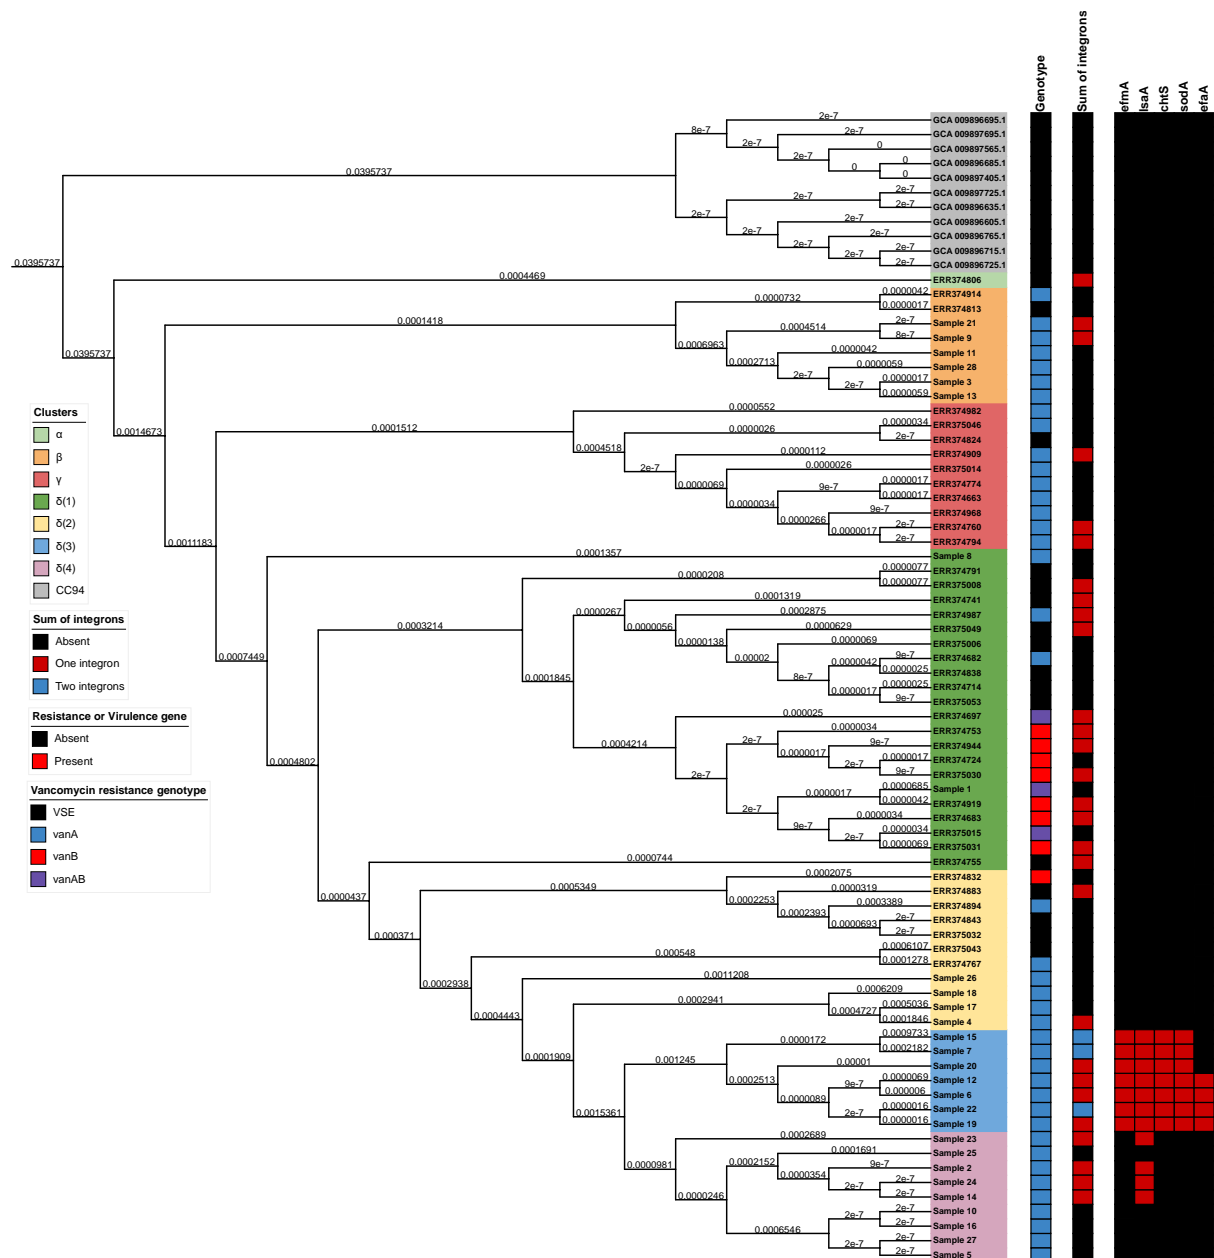

**Figure 15.** A phylogeny of isolates illustrating detected integron distributions as a categorical heatmap. Again, taxa are shaded based on their associated RheirBAPS cluster and a vancomycin resistance genotype is given as a separate bar for each taxon. Gene distributions (presence or absence) are given for *efmA* and *lsaA* (drug resistance), *chtS* and *soda* (metal and biocide resistance), and *efaA* (virulence factor).

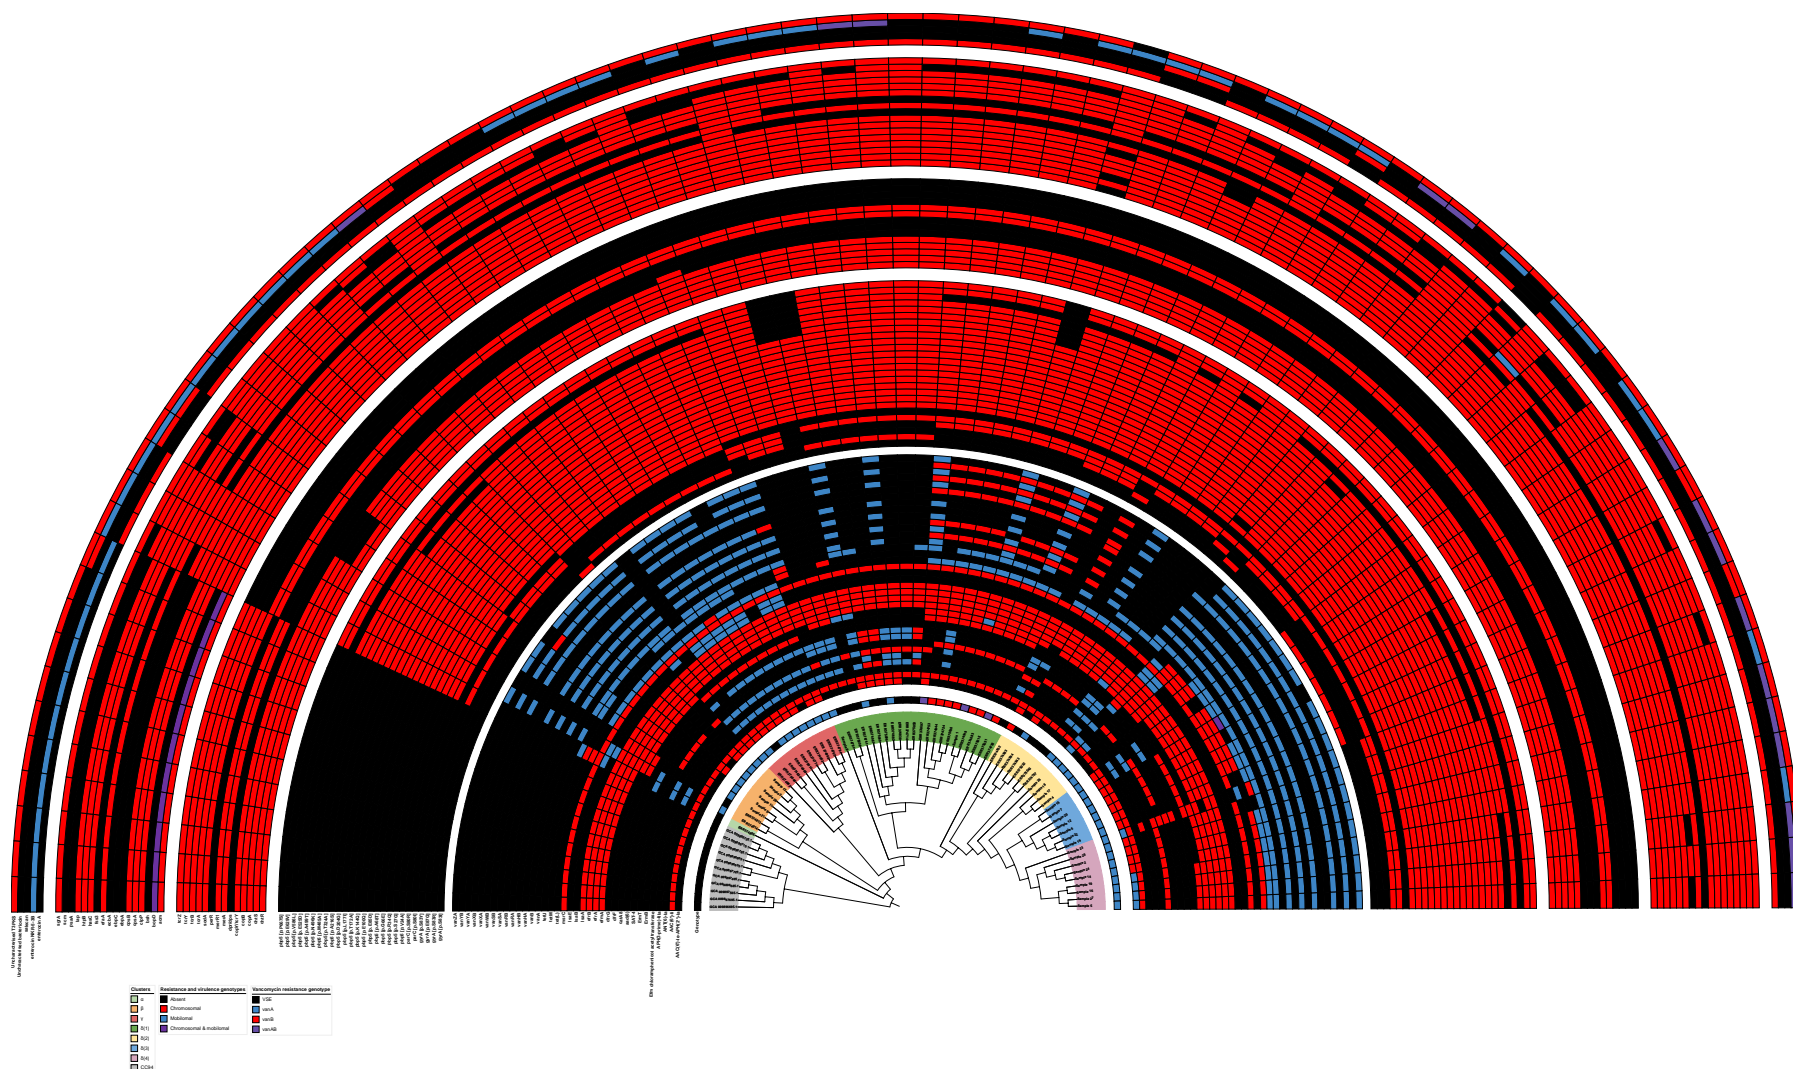

**SI Figure 1:** A 10,000 bootstrap phylogeny with all clinically relevant genes arranged as semi-circular categorical heatmaps. Annotation semi-circles are arranged as follows (innermost to outermost): drug resistance genotype, point mutation drug resistance genotype, metal (biocide) resistance genotype, virulence factor genotype, secondary metabolism production genotype

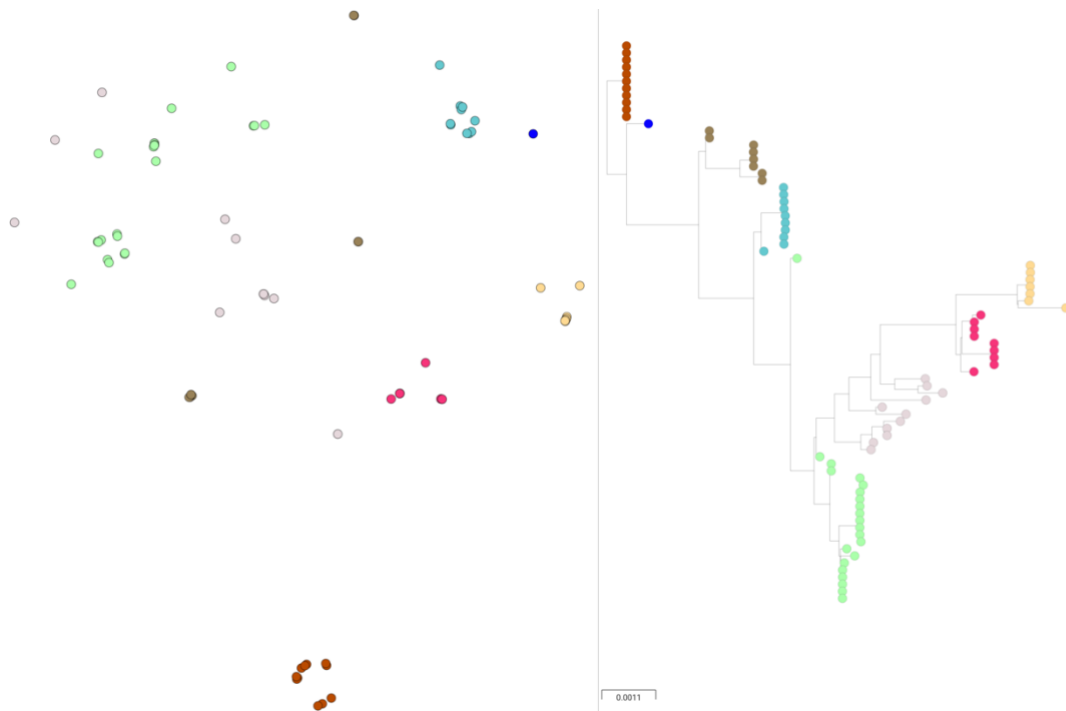

**SI Figure 2:** Core genome clustering. These clusters were produced using PANINI to corroborate cgMLST data, the phylogeny on the right is the same phylogeny used in all other images, colours are RheirBAPS clusters

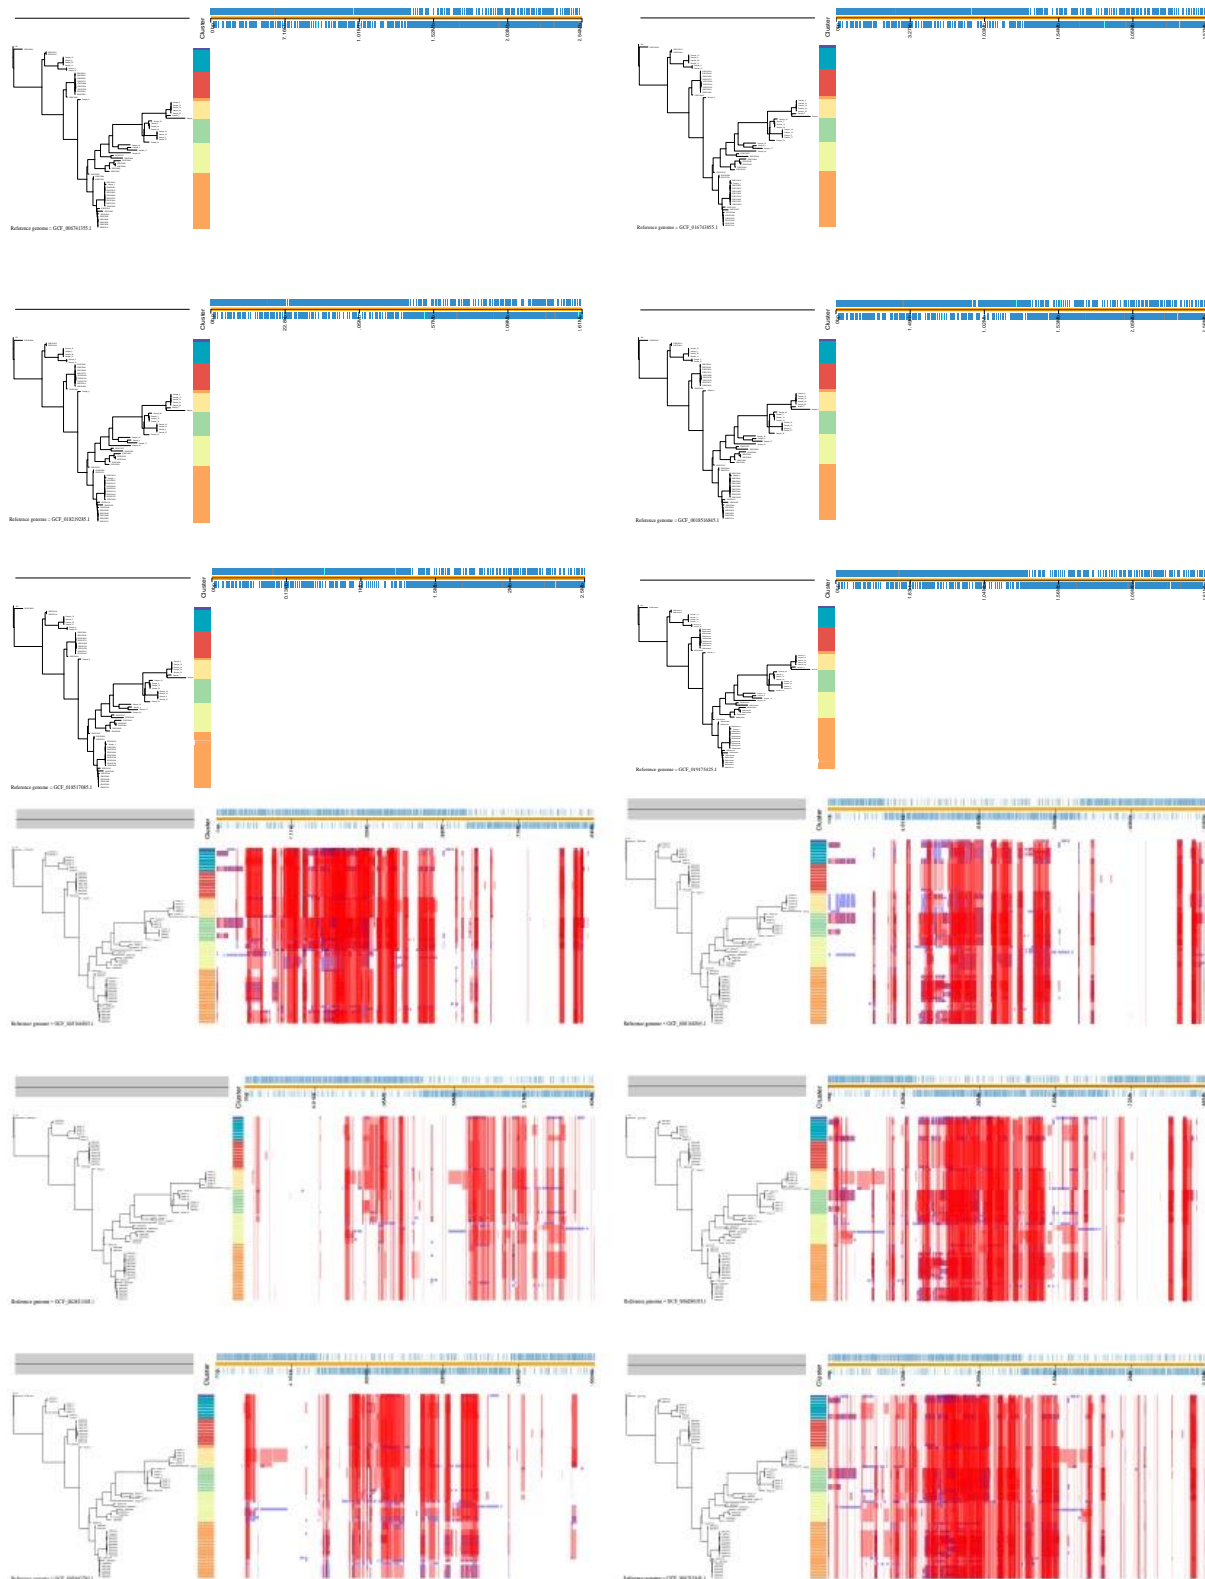

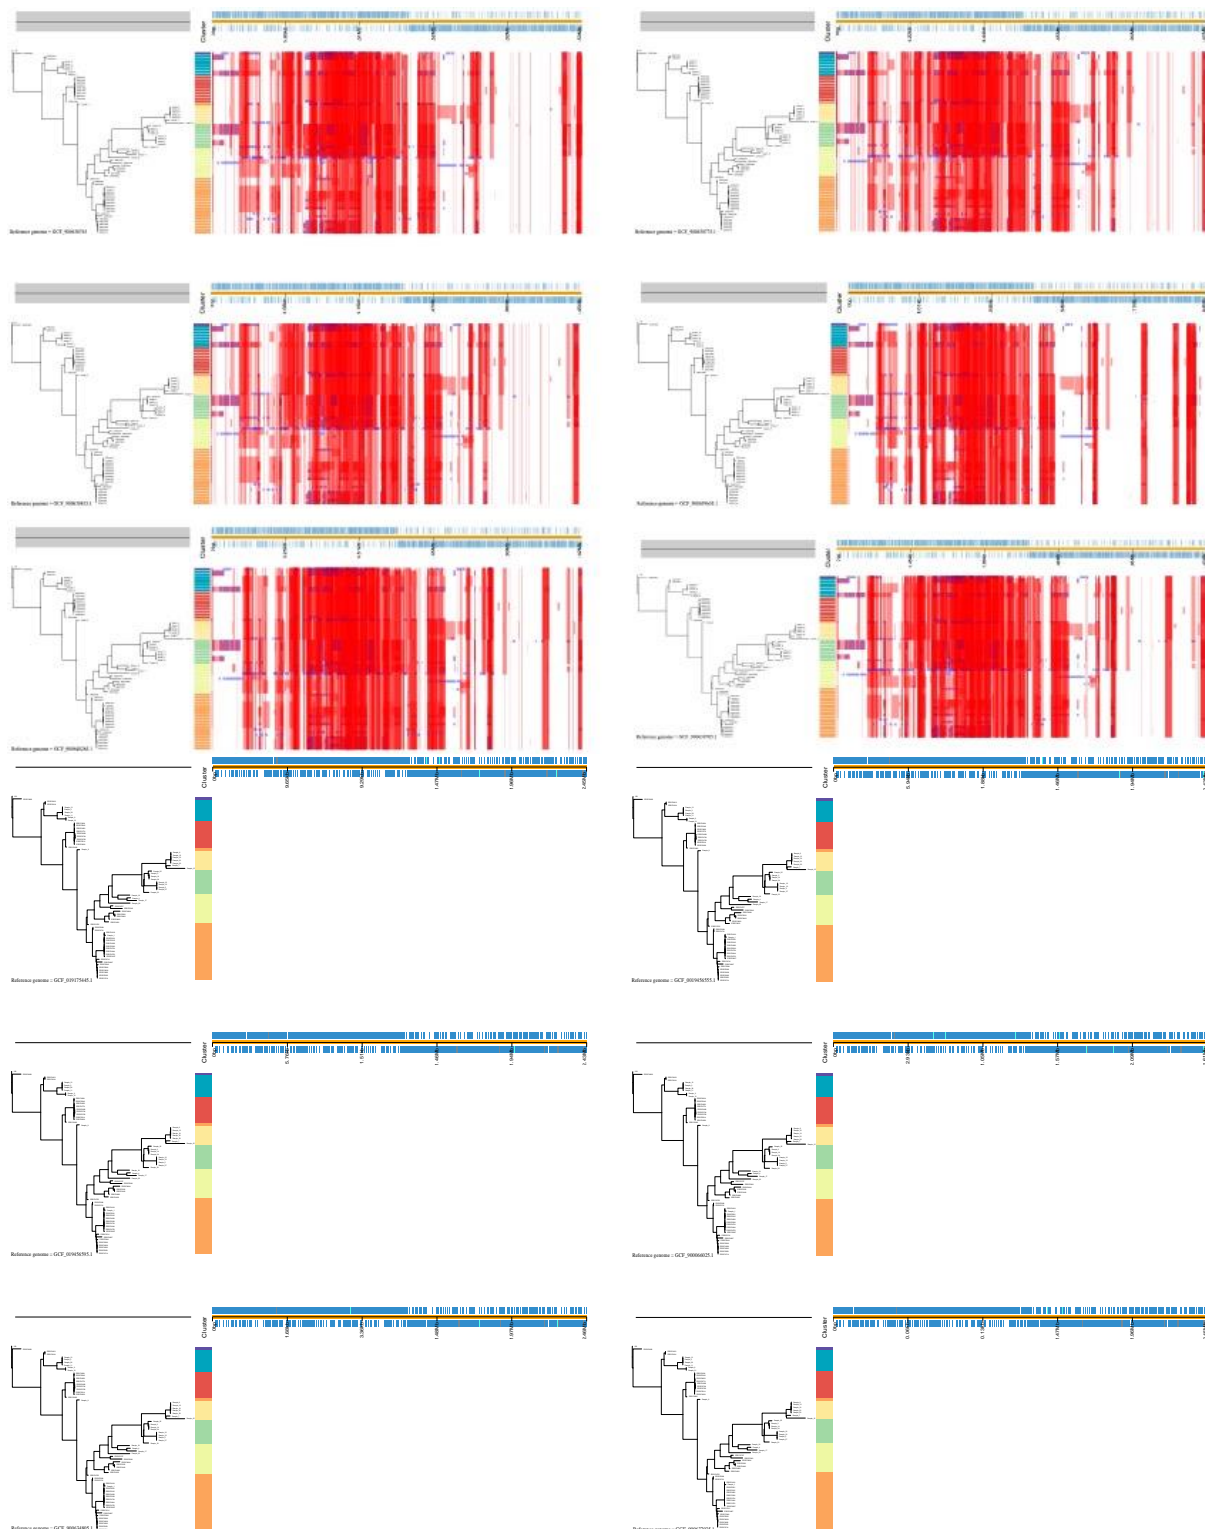

**SI Figure 3:** Genome recombination between 24 different reference genomes. Each reference genome diverged prior to CC17. Red bars illustrate hot spots compared to a reference, where a hotspot is defined as a site where more than one species reports a  $\geq 50\%$  likelihood for the same recombination event. Blue boxes illustrate a recombination event for a single species. Multiple different recombination events can occur at the same site (appearing as overlap in this image). The plot at the bottom shows the maximal amount of species affected by a detected recombination event in a given hotspot. Each reference genome is given in the bottom left.

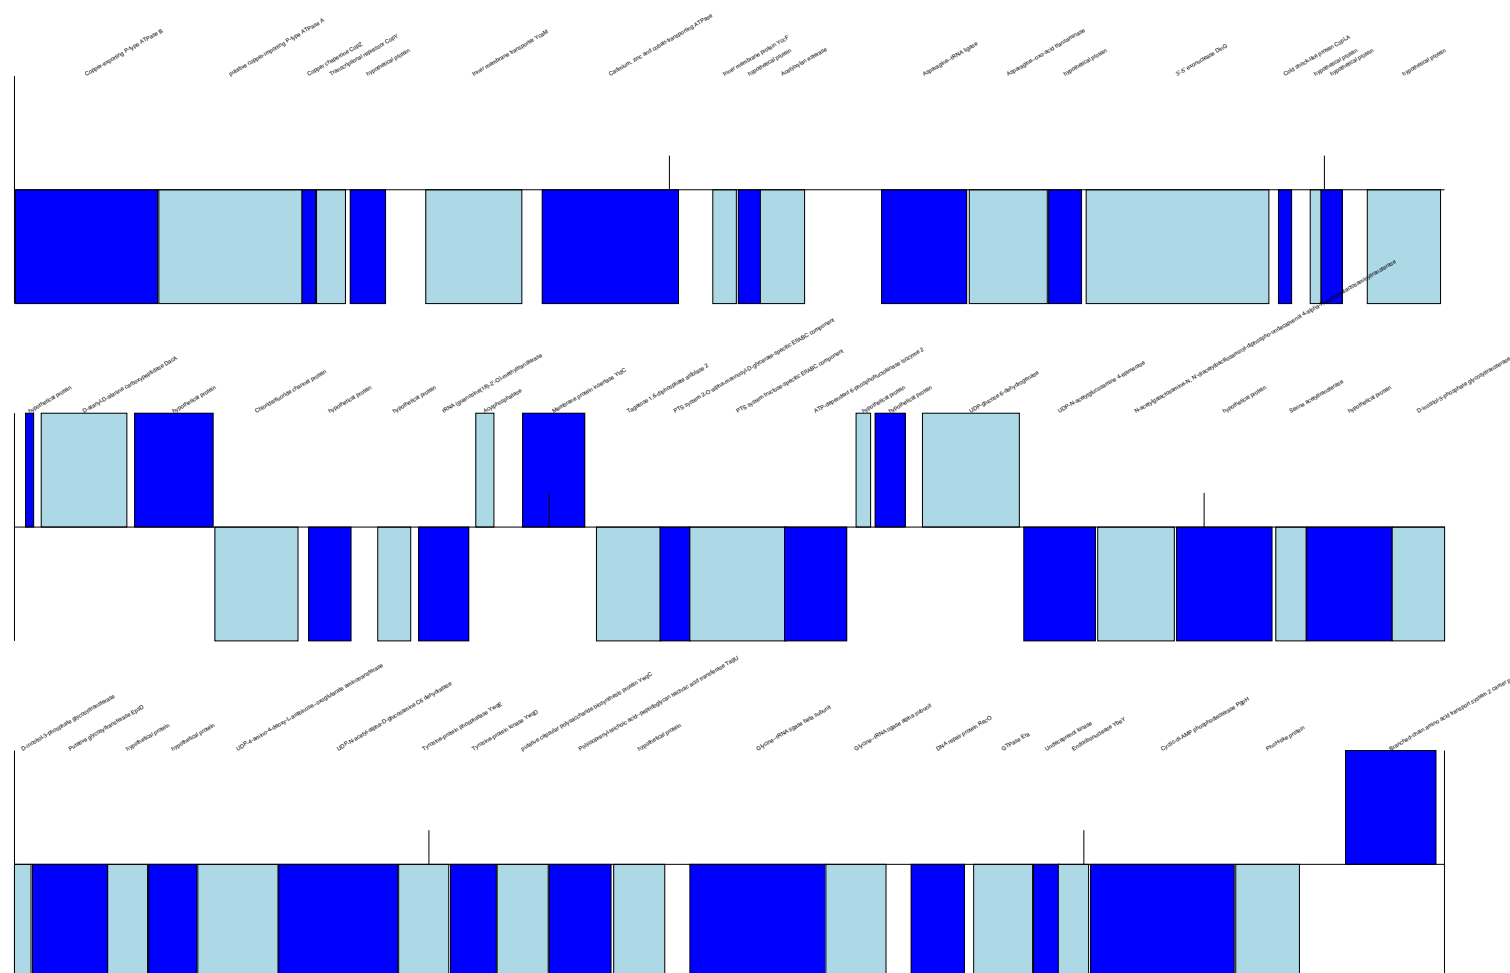

**Figure 4(a):** *arnB* contig in Sample 2. Positive sense genes are given above the line and negative sense are below the line. Genes are coloured in alternating blue for ease of visualisation



**Figure 4(b):** *arnB* contig in Sample 14. Positive sense genes are given above the line and negative sense are below the line. Genes are coloured in alternating blue for ease of visualisation





**Figure 4(c):** *arnB* contig in Sample 24. Positive sense genes are given above the line and negative sense are below the line. Genes are coloured in alternating blue for ease of visualisation
